# Supplementary material for: Observational evidence that urbanisation and neighbourhood deprivation are associated with escalation in chronic pharmacological pain treatment: a longitudinal population-based study in the Netherlands
Source: PubMed Central journal article supplement — BMJ Open. 2012 Jul 19;2(4):e000731. doi: 10.1136/bmjopen-2011-000731 (PMC3401953; doi:10.1136/bmjopen-2011-000731), 2012-07-19
Supplement: bmjopen-2011-000731.draft_revisions.pdf [file bmjopen-2011-000731.draft_revisions.pdf]

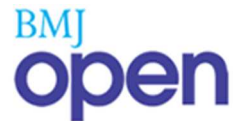

**Urbanisation and neighbourhood deprivation impact chronic pharmacological pain treatment - a large scale longitudinal cohort study in the Netherlands**

|                                 |                                                                                                                                                                                                                                                                                                                                                                                                                                                                                                                                  |
|---------------------------------|----------------------------------------------------------------------------------------------------------------------------------------------------------------------------------------------------------------------------------------------------------------------------------------------------------------------------------------------------------------------------------------------------------------------------------------------------------------------------------------------------------------------------------|
| Journal:                        | <i>BMJ Open</i>                                                                                                                                                                                                                                                                                                                                                                                                                                                                                                                  |
| Manuscript ID:                  | bmjopen-2011-000731                                                                                                                                                                                                                                                                                                                                                                                                                                                                                                              |
| Article Type:                   | Research                                                                                                                                                                                                                                                                                                                                                                                                                                                                                                                         |
| Date Submitted by the Author:   | 13-Dec-2011                                                                                                                                                                                                                                                                                                                                                                                                                                                                                                                      |
| Complete List of Authors:       | Leue, Carsten; Maastricht University Medical Centre, Department of Psychiatry and Medical Psychology<br>Buijs, Servaas; IMS Helath,<br>Strik, Jacqueline; Maastricht University Medical Centre, Psychiatry and Medical Psychology<br>Lousberg, Richel; Maastricht University Medical Centre, Psychiatry and Medical Psychology<br>Smit, Jasper; IMS Health,<br>van Kleef, Maarten; Maastricht University Medical Centre, Anaesthesiology<br>van Os, Jim; Maastricht University Medical Centre, Psychiatry and Medical Psychology |
| <b>Primary Subject Heading</b>: | General practice / Family practice                                                                                                                                                                                                                                                                                                                                                                                                                                                                                               |
| Secondary Subject Heading:      | Mental health, Health services research, Medical management, Anaesthesia                                                                                                                                                                                                                                                                                                                                                                                                                                                         |
| Keywords:                       | Pain management < ANAESTHETICS, MENTAL HEALTH, PAIN MANAGEMENT, PRIMARY CARE, Substance misuse < PSYCHIATRY                                                                                                                                                                                                                                                                                                                                                                                                                      |
|                                 |                                                                                                                                                                                                                                                                                                                                                                                                                                                                                                                                  |

SCHOLARONE™  
Manuscripts

## Original article

## Pain and the City:

## Observational evidence supporting contextual effects on persistent pain

Carsten Leue, consultant<sup>\*1</sup>, Servaas Buijs, statistician<sup>2</sup>, Jacqueline Strik, consultant<sup>1</sup>, Richel Lousberg, lecturer<sup>1</sup>, Jasper Smit, statistician<sup>2</sup>, Maarten van Kleef, professor<sup>3</sup>, Jim van Os, professor<sup>1,4</sup>

<sup>1</sup> Department of Psychiatry and Psychology, South Limburg Mental Health Research and Teaching Network, EURON, Maastricht University Medical Centre, Maastricht, The Netherlands.

<sup>2</sup> IMS Health BV, Capelle aan den IJssel, The Netherlands.

<sup>3</sup> Department of Anaesthesiology, Maastricht University Medical Centre, Maastricht, The Netherlands.

<sup>4</sup> King's College London, King's Health Partners, Department of Psychosis Studies, Institute of Psychiatry, London, United Kingdom.

\* Correspondence:

C. Leue, Department of Psychiatry and Medical Psychology, Maastricht University Medical Centre, PO BOX 616 (DRT 10), NL 6200 MD Maastricht, The Netherlands. Tel: ++31-43-3877444. Fax: ++31-43-3875444. E-mail: [c.leue@mumc.nl](mailto:c.leue@mumc.nl)

**Abstract:**

*Objective:* To examine whether urbanization and neighbourhood deprivation would impact chronic pharmacological pain treatment in terms of greater probability of analgesic escalation, accompanied by increased prescription of psychotropic medication.

*Design:* Longitudinal analysis of a population-based routine prescription database in the Netherlands.

*Setting:* Representative sample of pharmacies and dispensing general practitioners, covering 73% of the Dutch nationwide medication consumption in primary care and outpatients.

*Participants:* 449,410 patients aged 15-85 years were included, of whom 166,374 were in the *Starter group* and 283,036 in the *Continuation group* of chronic analgesic treatment.

*Main outcome measure:* Escalation of analgesics (i.e. change to a higher level of analgesic potency, classified in five levels) in association with urbanization and dichotomous neighbourhood deprivation was analysed over a six-month observation period.

*Results:* In both *Starter* and *Continuation* groups, escalation was positively associated with urbanization in a dose response fashion (*Starter group*: OR (urbanization level 1 compared to level 5): 1.24; 95% CI 1.18 to 1.30; *Continuation group*: OR 1.19; 95% CI 1.14 to 1.23). A weak but independent association was apparent with neighbourhood deprivation (*Starter group*: OR 1.06; 95% CI 1.02 to 1.11; *Continuation group*: OR 1.04; 95% CI 1.01 to 1.08). Use of somatic and particularly psychotropic co-medication was independently associated with escalation in both groups.

*Conclusion:* Escalation of chronic analgesic treatment is associated with urban and deprived environments, and occurs in a context of an increased rate of psychotropic medication

1  
2  
3  
4  
5  
6  
7  
8  
9  
10  
11  
12  
13  
14  
15  
16  
17  
18  
19  
20  
21  
22  
23  
24  
25  
26  
27  
28  
29  
30  
31  
32  
33  
34  
35  
36  
37  
38  
39  
40  
41  
42  
43  
44  
45  
46  
47  
48  
49  
50  
51  
52  
53  
54  
55  
56  
57  
58  
59  
60

prescriptions, suggesting pain outcomes are influenced by area influences affecting mental health.

For peer review only

## Introduction

The validity of the well-known epidemiological association between urban environment and mental health<sup>1-3</sup> is supported by work showing that urban living is associated with increased amygdala activity<sup>4</sup>, a key region in the regulation of stress, affective experience and pain<sup>5,6</sup>. Pain is the natural comorbid mental experience of somatic conditions<sup>7,8</sup>. In turn, pain is strongly influenced by comorbid mental disorders<sup>9,10</sup>. Given evidence of urban impact on risk for mental disorders, including psychiatric medication prescriptions<sup>11</sup>, we hypothesized that pain outcomes, indexed through prescriptions, would be poorer in urban environments and disadvantaged urban neighbourhoods. Pain outcomes were examined at the level of primary care and specialist outpatient care and defined in two ways: (i) escalation of analgesic treatment (i.e. prescription of more potent analgesics) and (ii) co-prescription of psychotropic medication in addition to analgesic treatment.

## Objective

We examined the hypothesis that chronic pharmacological pain treatment of outpatients and patients in primary care would show escalation of analgesics in association with the level of urbanization and neighbourhood index of deprivation. It was predicted that the highest levels of urbanization and neighbourhood deprivation would be associated with escalation of analgesic treatment to more potent pain medication (e.g. tramadol, morphine, methadone, etc.), while lower levels of urbanization and neighbourhood deprivation would be associated with less potent analgesics (e.g. paracetamol, aspirin, ibuprofen, etc.). Furthermore, we examined the hypothesis that escalation of analgesics would predict prescriptions of psychotropic medication (e.g. antidepressants, antipsychotics, mood

1  
2  
3 stabilizers, etc.) in patients prescribed chronic analgesic treatment. Study hypotheses were  
4  
5 specified before inspection of the data.  
6  
7  
8  
9

## 10 11 **Method**

### 12 13 *Data collection*

14  
15  
16  
17 The investigation was carried out by analysing records pertaining to Dutch routine general  
18  
19 practice and hospital outpatient treatment settings. Data were obtained from the IMS  
20  
21 Health's longitudinal prescription database (Lifelink, affiliate Capelle ad IJssel, The  
22  
23 Netherlands)<sup>12</sup>. This data source consists of anonymous longitudinal prescription records  
24  
25 from a representative sample of pharmacies and dispensing GPs, covering 73% of the Dutch  
26  
27 nationwide medication consumption of outpatients and primary care patients. The  
28  
29 computerized medication-dispensing histories contain data regarding dispensed  
30  
31 medications, type of prescriber, dispensing date, dispensed amount of medication,  
32  
33 prescribed dosage, and length of prescription. Data for each patient were anonymously and  
34  
35 independently sampled without linkage of prescriptions to the same patient across  
36  
37 pharmacies, because patients in the Netherlands are usually loyal to a single pharmacy<sup>13</sup>.  
38  
39 Potential bias caused by patients getting hospitalized, moving to another address or dying  
40  
41 was minimized by studying chronic pharmacological pain treatment.  
42  
43  
44  
45  
46  
47  
48  
49  
50  
51

### 52 53 *Patient groups*

54  
55 Patient selection started with the identification of chronic users of analgesic medication  
56  
57 during a six-month prescription period (hereafter: observation period). Chronic use was  
58  
59  
60

defined as in receipt of analgesic pharmacotherapy during at least two distinct moments covering an interval of at least two months. In order to track medication for other therapeutic indications (i.e. psychotropic medication and pharmaco-treatment for somatic disorders), patients were observed for a period of six months prior to initiation of analgesic treatment. Next, the cohort with chronic use of analgesics was divided into two groups. *Starters* were defined as patients who had not received any analgesics during the six-month period prior to the observation period (hereafter: *Starter group*). Patients who *continued* with pain medication that was already prescribed in the six month before the observation period formed the second group (hereafter: *Continuation group*). The latter group consisted of all patients who had already received analgesics in the first month of the six-month period prior to the observation period, in order to define chronic analgesic treatment before observation (Figure 1).

**Figure 1: Starter group and Continuation Group of chronic analgesic treatment**

|                            | Time (months)               |   |   |   |   |   |                    |             |         |    |    |    |
|----------------------------|-----------------------------|---|---|---|---|---|--------------------|-------------|---------|----|----|----|
|                            | period prior to observation |   |   |   |   |   | observation period |             |         |    |    |    |
|                            | 1                           | 2 | 3 | 4 | 5 | 6 | 7                  | 8           | 9       | 10 | 11 | 12 |
| <b>starting patients</b>   | no Rx for analgesics        |   |   |   |   |   | first Rx           | Rx - Rx ... | last Rx |    |    |    |
| <b>continuing patients</b> | first Rx                    |   |   |   |   |   | Rx - Rx - Rx ...   | last Rx     |         |    |    |    |

Legend: Schedule of prescriptions (Rx) in Starter group (top) and Continuation group (bottom) of chronic analgesic treatment covering a 12 month period. Months 7 to 12 are the observation period, months 1 to 6 and the pre-observation period.

Data were obtained from the LRx database from month one to twelve as depicted in Figure 1. Statistics were executed at sample level and no projection was applied. Use of other medications (e.g. psychotropic medication and medication for a broad spectrum of somatic conditions) was collected for all patients as well, covering the period of twelve

1  
2  
3 months, consisting of (i) the pre-observation period (month one to six) and (ii) the  
4  
5 observation period (month seven to twelve)).  
6  
7

8  
9  
10  
11 *Escalation of pharmacological pain treatment*  
12

13  
14 All individual prescriptions of analgesics were observed for each patient in both the Starter  
15 and Continuation groups during the observation period and during the six months prior to  
16 the observation period. At each dispensing date, analgesics were classified *a priori* in five  
17 levels, in order of analgesic potency (Figure 2).  
18  
19  
20  
21  
22  
23  
24  
25  
26  
27

28 **Figure 2: Level of analgesic potency\***  
29

| Level   | Medication                |
|---------|---------------------------|
| Level 1 | Paracetamol               |
| Level 2 | Prostaglandine inhibitors |
| Level 3 | Anti-epileptics (a,b)     |
| Level 4 | Weak opiates (c)          |
| Level 5 | Strong opiates (d)        |

30  
31  
32  
33  
34  
35  
36  
37  
38  
39  
40  
41  
42  
43 Legend:

- 44 \* Level 1 (i.e. lowest potency) to level 5 (i.e. highest potency)  
45 (a) Gabapentine, pregabalin and no other anti-epileptic drugs  
46 (b) Carbamazepine, valproic acid, lamotrigine and medication of level 1 or 2  
47 (c) Tramadol, codeine  
48 (d) Methadone, oxycodone, hydromorphone, morphine, buprenorphine, fentanyl, sufentanil,  
49 pethidine  
50  
51  
52  
53  
54  
55  
56  
57  
58  
59  
60

Confirmation of escalation during the observation period was based on the  
comparison of analgesic potency at the first dispensing day and the last day of prescription.



1  
2  
3 The comparison of first and last prescription of analgesics resulted in the following  
4  
5 categories of analgesic escalation: neutral (i.e. no change of analgesic potency), escalation in  
6  
7 analgesic treatment (i.e. change to a higher level of analgesic potency), or de-escalation in  
8  
9 pharmacological pain treatment (i.e. change to a lower analgesic potency) (Table 1).  
10  
11

12  
13 If patients received several analgesics on the same day, both the highest and the  
14  
15 second highest level of analgesic potency were included in the analyses, in order to define  
16  
17 escalation categories (e.g. a change from level 5 plus level 2 to level 5 plus level 3 indicating  
18  
19 that escalation had occurred).  
20  
21

#### 22 23 24 25 26 *Determinants of escalation in analgesic treatment* 27

28  
29 Three groups of variables hypothesized to act as mediators or confounders were included in  
30  
31 the analyses. The first group were patient characteristics such as sex (0=men, 1=women),  
32  
33 age (in years) and the location of patient's pharmacy (defined by postal code). The latter  
34  
35 variable defined the level of urbanization following the definition of the Dutch Central  
36  
37 Bureau of Statistics (level 1 = highest level of urbanisation, to level 5 = rural environment;  
38  
39 described in more detail elsewhere<sup>14 15</sup>) and dichotomously defined neighbourhood  
40  
41 deprivation (0=no, 1=yes). The dichotomous measure of neighbourhood deprivation was  
42  
43 developed by the Netherlands Institute of Research in Healthcare (NIVEL), using socio-  
44  
45 economic indicators such as unemployment rate, average income, population density and  
46  
47 ethnic variation<sup>16</sup>. Healthcare professionals receive higher levels of funding for their services  
48  
49 in these deprived areas<sup>17</sup>. Neighbourhood deprivation was associated with level of  
50  
51 urbanization: 86% of the sample living in deprived neighbourhoods lived in an area with the  
52  
53  
54  
55  
56  
57  
58  
59  
60

1  
2  
3 highest level of urbanization. Moreover, the other patients (14%) living in deprived  
4  
5 neighbourhoods lived in an area with the second highest level of urbanization.  
6  
7

8  
9 Furthermore, psychotropic co-medication was classified into its different classes, and  
10  
11 somatic co-medication was similarly grouped in 10 classes (ACE inhibitors, angiotensine II  
12  
13 inhibitors; antidiabetics; beta-blockers; calcium antagonists; functional bowel drugs;  
14  
15 laxatives; migraine medication; respiratory medication; steroid-antiphlogistics; stomach  
16  
17 protectors) (Table 1 to 3). In the Starting group, occurrence of co-medication was time-  
18  
19 coded at three levels according to day of first occurrence (i.e. co-medication prescription  
20  
21 before start with analgesics, at the same day or after start of analgesic treatment) (Table 2).  
22  
23 In the Continuation group, occurrence of co-medication was recorded dichotomously  
24  
25 (presence/absence), since it was impossible to distinguish occurrence of co-medication as  
26  
27 before or at start of analgesic treatment (Table 3).  
28  
29  
30  
31  
32  
33  
34  
35

### 36 *Statistical analysis*

37  
38  
39 First, we analysed the pattern of (de-) escalation in analgesic treatment by means of an  
40  
41 ordered logistic multivariable regression model with adjusted odds ratios (and 95%  
42  
43 confidence interval) using SAS version 9.1<sup>18</sup>. Statistical significance for the model was  
44  
45 defined at conventional alpha of 0.05. The dependent variable in this model was the  
46  
47 development of a patient's analgesic treatment (de-escalation, neutral, escalation).  
48  
49 Independent variables, entered simultaneously in the model, were demographic  
50  
51 characteristics, neighbourhood deprivation, and urbanization, use of psychotropic  
52  
53 medication and use of somatic medication. In the Starting group, we also included first  
54  
55 occurrence of co-medication. The significance of the model and the adjusted R-square value  
56  
57  
58  
59  
60

|  |               |                    |
|--|---------------|--------------------|
|  | Starter group | Continuation Group |
|--|---------------|--------------------|

were used to assess model reliability. Models for Starter and Continuation groups were run separately, given different sample selection criteria. Proportional odds were assumed in the models of escalation and de-escalation of analgesic treatment, and analyses inspected for violation of this assumption. If a determinant was positively associated with escalation of analgesics, absence of this variable was associated negatively with escalation or positively with de-escalation in analgesic treatment (and vice versa). This offered advantage compared to separate models for escalation and de-escalation (such as consistency of model estimates) and avoided double use of patients with a neutral development of analgesic treatment.

## Results

Overall, 449,410 patients were included, of which 166,374 were in the Starter group and 283,036 in the Continuation group. The baseline characteristics of both groups are shown in table 1.

**Table 1: Baseline characteristics of the patient population with chronic analgesic treatment**

|             |                                        | Deprived<br>nb.hoods | Urbanicity <sup>1</sup><br>1 | Urbanicity<br>2-5 | Deprived<br>nb. hoods | Urbanicity<br>1 | Urbanicity<br>2-5 |
|-------------|----------------------------------------|----------------------|------------------------------|-------------------|-----------------------|-----------------|-------------------|
| Patients    | (Absolute)                             | 12,485               | 45,458                       | 120,916           | 21,799                | 78,358          | 204,678           |
| Change in   | Analgesics <sup>2</sup>                |                      |                              |                   |                       |                 |                   |
|             | De-escalation                          | 13.3%                | 12.1%                        | 10.4%             | 13.2%                 | 12.5%           | 11.2%             |
|             | Neutral                                | 70.1%                | 71.6%                        | 74.5%             | 70.0%                 | 71.4%           | 73.7%             |
|             | Escalation                             | 16.5%                | 16.3%                        | 15.1%             | 16.8%                 | 16.1%           | 15.1%             |
| Gender      | Male                                   | 39.8%                | 39.3%                        | 40.3%             | 36.7%                 | 35.2%           | 34.6%             |
|             | Female                                 | 60.2%                | 60.7%                        | 59.7%             | 63.3%                 | 64.8%           | 65.4%             |
| Age (years) | 15-25                                  | 6.3%                 | 6.1%                         | 6.5%              | 1.8%                  | 1.6%            | 1.8%              |
|             | 26-40                                  | 23.8%                | 19.2%                        | 16.3%             | 14.0%                 | 10.8%           | 9.7%              |
|             | 41-65                                  | 50.0%                | 49.6%                        | 50.9%             | 56.9%                 | 53.4%           | 51.8%             |
|             | 65-85                                  | 19.8%                | 25.2%                        | 26.2%             | 27.3%                 | 34.2%           | 36.7%             |
| First       | Analgesics                             |                      |                              |                   |                       |                 |                   |
|             | Level 1                                | 3.2%                 | 3.9%                         | 4.0%              | 3.0%                  | 3.8%            | 4.1%              |
|             | Level 2                                | 64.8%                | 66.6%                        | 72.6%             | 47.8%                 | 47.1%           | 53.6%             |
|             | Level 3                                | 2.2%                 | 2.5%                         | 2.6%              | 6.4%                  | 8.1%            | 8.9%              |
|             | Level 4                                | 27.4%                | 24.2%                        | 18.3%             | 36.1%                 | 33.9%           | 27.6%             |
|             | Level 5                                | 2.4%                 | 2.9%                         | 2.6%              | 6.8%                  | 7.2%            | 5.9%              |
|             | level 4/5                              | 29.8%                | 27.0%                        | 20.8%             | 42.8%                 | 41.1%           | 33.5%             |
| Last        | Analgesics                             |                      |                              |                   |                       |                 |                   |
|             | Level 1                                | 3.4%                 | 3.9%                         | 4.0%              | 3.4%                  | 4.1%            | 4.3%              |
|             | Level 2                                | 61.9%                | 63.0%                        | 68.4%             | 44.5%                 | 44.1%           | 50.1%             |
|             | Level 3                                | 3.0%                 | 3.3%                         | 3.4%              | 7.0%                  | 8.4%            | 9.2%              |
|             | Level 4                                | 27.6%                | 24.6%                        | 18.9%             | 36.8%                 | 34.5%           | 28.4%             |
|             | Level 5                                | 4.1%                 | 5.2%                         | 5.3%              | 8.3%                  | 9.0%            | 7.9%              |
|             | Level 4/5                              | 31.7%                | 29.8%                        | 24.2%             | 45.1%                 | 43.4%           | 36.3%             |
| Concomitant | Medication <sup>3</sup>                |                      |                              |                   |                       |                 |                   |
|             | Any concomitant drug                   | 78.8%                | 79.0%                        | 77.3%             | 89.3%                 | 89.6%           | 88.0%             |
|             | Migraine medication                    | 3.9%                 | 3.6%                         | 3.8%              | 5.9%                  | 5.2%            | 5.1%              |
|             | Any psychotropic medication            | 35.1%                | 36.6%                        | 34.8%             | 51.6%                 | 53.2%           | 50.2%             |
|             | TCA                                    | 5.2%                 | 5.0%                         | 5.0%              | 9.5%                  | 9.4%            | 9.6%              |
|             | Other AD                               | 2.4%                 | 2.0%                         | 1.6%              | 4.0%                  | 3.3%            | 2.7%              |
|             | Antipsychotics total                   | 4.1%                 | 3.9%                         | 3.1%              | 6.7%                  | 6.1%            | 4.9%              |
|             | Antipsychotics atypical                | 2.4%                 | 2.2%                         | 1.5%              | 4.1%                  | 3.5%            | 2.5%              |
|             | Antipsychotics classic                 | 2.0%                 | 2.1%                         | 1.8%              | 3.2%                  | 3.2%            | 2.7%              |
|             | Burpropion                             | 0.1%                 | 0.1%                         | 0.1%              | 0.2%                  | 0.2%            | 0.1%              |
|             | MAO inhibitors                         | 0.0%                 | 0.0%                         | 0.1%              | 0.1%                  | 0.1%            | 0.1%              |
|             | Mood stabilizers                       | 0.2%                 | 0.3%                         | 0.2%              | 0.3%                  | 0.4%            | 0.4%              |
|             | Sedatives                              | 27.0%                | 29.0%                        | 27.4%             | 41.5%                 | 43.4%           | 40.6%             |
|             | SNRI                                   | 2.6%                 | 2.4%                         | 2.2%              | 4.5%                  | 4.0%            | 3.5%              |
|             | SSRI                                   | 7.5%                 | 7.0%                         | 6.4%              | 10.3%                 | 10.0%           | 9.0%              |
|             | Psycho-stimulants                      | 0.4%                 | 0.5%                         | 0.5%              | 0.3%                  | 0.5%            | 0.4%              |
|             | Any somatic medication                 | 72.3%                | 72.6%                        | 71.0%             | 83.0%                 | 82.9%           | 81.7%             |
|             | Cardiovascular medication <sup>4</sup> | 30.9%                | 31.4%                        | 30.8%             | 35.2%                 | 34.9%           | 34.9%             |
|             | Other Somatic medication <sup>5</sup>  | 65.2%                | 65.5%                        | 64.0%             | 76.9%                 | 76.7%           | 75.4%             |

Legend: Patient characteristics are presented as percentages (e.g. age, gender, level of analgesic treatment, change in analgesic treatment (e.g. escalation, de-escalation, and neutral development of prescriptions), and concomitant medication). Absolute patient numbers are presented for the Starter and the Continuation group of chronic analgesic treatment concerning level of urbanicity and for neighbourhood deprivation.

(1) Urbanicity = Urbanization (level 1 = highest level of urbanization; level 5 = rural environment)

(2) Change in pain medication from first to last prescription (neutral = no change in level of potency, escalation = change to a higher level of analgesic potency, de-escalation = change to lower analgesic potency)

- 1
- 2
- 3 (3) Concomitant drug use, observed during a period of 12 month
- 4
- 5 (4) Cardiovascular medication: beta-blocker, calcium antagonist, ACE inhibitor, angiotensine II
- 6 inhibitor
- 7
- 8 (5) Gastro-intestinal medication: anti-diabetics, steroid-antiphogistics, respiratory medication
- 9
- 10
- 11
- 12

13 About 7.6% of all escalating patients were residing in a deprived neighbourhood, and  
14 approximately 27.6% were living in the most densely populated areas (urbanization level 1)  
15 (Table 1). The majority was female, and there were more patients showing escalation  
16 (15.4%) than de-escalation (11.3%) of analgesic treatment. The majority of patients  
17 continued a neutral analgesic treatment regime (73.3%) (Table 1). Most of the patients were  
18 treated at level 2 or level 4 of analgesic potency. Almost all patients were using other  
19 medications, regardless of the different categories in table 1 (84.5%). Around half were using  
20 psychotropic medication (45.2%), most were using somatic co-medication (78.1%), and more  
21 than a third were using both (38.8%) (Table 1).  
22  
23  
24  
25  
26  
27  
28  
29  
30  
31  
32  
33  
34

35 The Starter group mainly initiated an analgesic at level 2 (70.9%) and level 4 (19.9),  
36 whereas only 2.6% directly initiated at level 5. However, analgesic potency level 4 and 5  
37 increased up to 20.5% respectively 5.2% by the time of the last prescription in the Starter  
38 group (Table 1).  
39  
40  
41  
42  
43  
44

45 In the Continuation group, patients already received analgesics at a higher level of  
46 potency at inclusion compared to the last observed level of medication potency in the  
47 Starter group. Level 4 and 5 was observed in 35.6% at the start of the observation period,  
48 increasing to 38.3% at the end of observation period (Table 1).  
49  
50  
51  
52  
53  
54

55 Escalation of analgesic treatment was observed more often in deprived  
56 neighbourhoods and the most densely populated areas (16.8% and 16.1% in the  
57  
58  
59  
60

1  
2  
3 Continuation group, respectively 16.5% and 16.3% in the Starting group) compared to lower  
4  
5 densely populated areas (15.1%) and non-deprived neighbourhoods (15.3.%) (Table 1). The  
6  
7 proportion of patients with neutral development of analgesic treatment was lower in  
8  
9 deprived neighbourhoods and areas with the highest degree of urbanization compared to  
10  
11 less densely populated areas (Table 1).  
12  
13

14  
15 In the Starter group, escalation was positively associated with lower level of first  
16  
17 observed pain medication. Escalation was furthermore associated, in a dose-response  
18  
19 fashion, with level of urbanization (highest adjusted Odds Ratio (OR) 1.24 at level 1; 95%  
20  
21 Confidence Interval (CI) 1.18 to 1.30; compared to reference level 5) (Table 2). Furthermore,  
22  
23 a weak but independent association existed between escalation and neighbourhood  
24  
25 deprivation (OR 1.06; 95% CI 1.02 to 1.11) (Table 2). Use of tricyclic antidepressants (TCA),  
26  
27 mood stabilizers (OR 1.36; 95% CI 1.07 to 1.42), sedatives, cardiovascular medication (OR  
28  
29 1.16; 95% CI 1.13 to 1.19) and medications for other somatic conditions was associated with  
30  
31 analgesics escalation, when prescribed *before* start of analgesics (Table 2). Similarly, in the  
32  
33 Starter group, escalation of analgesic treatment was also associated with the use of selective  
34  
35 noradrenalin serotonin reuptake inhibitors (SNRI), sedatives (OR 1.82; 95% CI 1.74 to 1.89),  
36  
37 TCA (OR 2.19; 95% CI 2.03 to 2.36), and antipsychotics (OR 2.43; 95% CI 2.19 to 2.68) when  
38  
39 prescribed *after* start of analgesics (Table 2). Negative associations with escalation (i.e.  
40  
41 positive association with de-escalation) were apparent for younger age, female sex, and  
42  
43 pharmacological migraine treatment. Furthermore, use of antipsychotics was negatively  
44  
45 associated with escalation if started *simultaneously* with analgesic treatment (OR 0.70; 95%  
46  
47 CI 0.58 to 0.84) (Table 2).  
48  
49  
50  
51  
52  
53  
54  
55  
56  
57  
58  
59  
60

1  
2  
3 The use of selective serotonin reuptake inhibitors (SSRI), before, at or after start of  
4  
5 analgesic treatment was not associated with escalation of analgesics in the Starter group  
6  
7  
8 (Table 2).  
9

10  
11 **Table 2: Associations with escalation<sup>1</sup> in pharmacological pain treatment for the *Starter Group* of**  
12 **chronic analgesic treatment**  
13

14  
15  
16  
17  
18  
19  
20  
21  
22  
23  
24  
25  
26  
27  
28  
29  
30  
31  
32  
33  
34  
35  
36  
37  
38  
39  
40  
41  
42  
43  
44  
45  
46  
47  
48  
49  
50  
51  
52  
53  
54  
55  
56  
57  
58  
59  
60

For peer review only

| Exposure                  |                                         | Adj. Odds Ratio | Significance <sup>2</sup> | CI <sup>3</sup> |       |
|---------------------------|-----------------------------------------|-----------------|---------------------------|-----------------|-------|
|                           |                                         |                 |                           | Lower           | Upper |
| Analgesics                | Level 1                                 | 58.23           | *                         | 53.60           | 63.27 |
|                           | Level 2                                 | 17.92           | *                         | 16.75           | 19.16 |
|                           | Level 3                                 | 4.66            | *                         | 4.23            | 5.14  |
|                           | Level 4                                 | 1.36            | *                         | 1.27            | 1.45  |
|                           | Level 5                                 | Reference       |                           | -               | -     |
| Gender                    | Female                                  | 0.97            | *                         | 0.95            | 0.99  |
|                           | Male                                    | Reference       |                           | 0.00            | 0.00  |
| Age (years)               | 15-25                                   | 0.73            | *                         | 0.69            | 0.77  |
|                           | 26-40                                   | 0.81            | *                         | 0.78            | 0.84  |
|                           | 41-65                                   | 0.87            | *                         | 0.85            | 0.90  |
|                           | 66-85                                   | Reference       |                           | -               | -     |
| Urbanization <sup>4</sup> | 1                                       | 1.24            | *                         | 1.18            | 1.30  |
|                           | 2                                       | 1.16            | *                         | 1.11            | 1.22  |
|                           | 3                                       | 1.11            | *                         | 1.06            | 1.17  |
|                           | 4                                       | 1.07            | *                         | 1.02            | 1.13  |
|                           | 5                                       | Reference       |                           | -               | -     |
| Deprived Neighbourhood    | Yes                                     | 1.07            | *                         | 1.02            | 1.11  |
|                           | No                                      | Reference       |                           | -               | -     |
| SNRI                      | <sup>5</sup> Before start of analgesics | 1.05            | -                         | 0.96            | 1.14  |
|                           | Same start date                         | 1.28            | -                         | 0.97            | 1.69  |
|                           | After analgesics started                | 1.26            | *                         | 1.09            | 1.45  |
|                           | None                                    | Reference       |                           | -               | -     |
| SSRI                      | Before start of analgesics              | 0.97            | -                         | 0.92            | 1.02  |
|                           | Same start date                         | 0.97            | -                         | 0.83            | 1.15  |
|                           | After analgesics started                | 1.07            | -                         | 0.97            | 1.18  |
|                           | None                                    | Reference       |                           | -               | -     |
| TCA                       | Before start of analgesics              | 1.23            | *                         | 1.15            | 1.32  |
|                           | Same start date                         | 1.32            | *                         | 1.12            | 1.54  |
|                           | After analgesics started                | 2.19            | *                         | 2.03            | 2.36  |
|                           | None                                    | Reference       |                           | -               | -     |
| Other AD                  | Before start of analgesics              | 1.03            | -                         | 0.93            | 1.15  |
|                           | Same start date                         | 0.93            | -                         | 0.71            | 1.21  |
|                           | After analgesics started                | 1.22            | *                         | 1.06            | 1.42  |
|                           | None                                    | Reference       |                           | -               | -     |
| Antipsychotics            | Before start of analgesics              | 0.92            | -                         | 0.85            | 1.01  |
|                           | Same start date                         | 0.69            | *                         | 0.58            | 0.83  |
|                           | After analgesics started                | 2.42            | *                         | 2.18            | 2.67  |
|                           | None                                    | Reference       |                           | -               | -     |
| Mood stabilizers          | Before start of analgesics              | 1.40            | *                         | 1.10            | 1.79  |
|                           | Same start date                         | 0.91            | -                         | 0.43            | 1.89  |
|                           | After analgesics started                | 0.71            | -                         | 0.39            | 1.31  |
|                           | None                                    | Reference       |                           | -               | -     |
| Sedatives                 | Before start of analgesics              | 1.24            | *                         | 1.20            | 1.28  |
|                           | Same start date                         | 1.25            | *                         | 1.18            | 1.33  |
|                           | After analgesics started                | 1.82            | *                         | 1.74            | 1.89  |
|                           | None                                    | Reference       |                           | -               | -     |
| Cardio-Vascular drugs     | Before start of analgesics              | 1.16            | *                         | 1.13            | 1.19  |
|                           | Same start date                         | 0.86            | *                         | 0.79            | 0.95  |
|                           | After analgesics started                | 1.35            | *                         | 1.26            | 1.45  |
|                           | None                                    | Reference       |                           | -               | -     |
| Other Somatic drugs       | Before start of analgesics              | 1.25            | *                         | 1.22            | 1.29  |
|                           | Same start date                         | 1.11            | *                         | 1.07            | 1.15  |
|                           | After analgesics started                | 1.19            | *                         | 1.15            | 1.23  |
|                           | None                                    | Reference       |                           | -               | -     |
| Migraine medication       | Before start of analgesics              | 0.83            | *                         | 0.77            | 0.89  |
|                           | Same start date                         | 0.95            | -                         | 0.78            | 1.17  |
|                           | After analgesics started                | 0.91            | -                         | 0.81            | 1.02  |
|                           | None                                    | Reference       |                           | -               | -     |



- (1) Escalation = change to a higher level of analgesic potency
- (2) Significant variable, p-value<0.05
- (3) 95% CI: confidence interval
- (4) 1 = highest level of urbanization, 5 = rural environment
- (5) Starting date of medication (before, at the same day or after start of analgesics)

In the Continuation group, escalation of analgesics was positively associated with lowest levels of first observed analgesics. Furthermore, escalation was associated with level of urbanization in a dose response fashion (highest adjusted OR 1.19 at level 1; 95% CI 1.14 to 1.23; compared to reference level 5) (Table 3). There was also an association between escalation and deprived neighbourhoods, use of SSRI, SNRI, TCA, all antipsychotics, and sedatives (OR 1.31; 95% CI 1.29 to 1.33) as well as use of somatic co-medication (OR 1.12; 95% CI 1.10 to 1.14) (Table 3). De-escalation was associated with female sex, younger age, treatment of migraine, and use of second-generation antipsychotics (OR 0.80; 95% CI 0.70 to 0.91) (Table 3).

**Table 3: Associations with escalation<sup>1</sup> in pharmacological pain treatment for the *Continuation Group* of chronic analgesic treatment**

| Exposure                   |             | Adjusted Odds | Significance <sup>2</sup> | 95%   | CI <sup>3</sup> |
|----------------------------|-------------|---------------|---------------------------|-------|-----------------|
|                            |             | Ratio         |                           | Lower | Upper           |
| Analgesics                 | Level 1     | 16.00         | *                         | 15.20 | 16.85           |
|                            | Level 2     | 7.87          | *                         | 7.59  | 8.16            |
|                            | Level 3     | 3.14          | *                         | 3.00  | 3.28            |
|                            | Level 4     | 1.55          | *                         | 1.50  | 1.61            |
|                            | Level 5     | Reference     |                           | -     | -               |
| Gender                     | Female      | 0.96          | *                         | 0.94  | 0.98            |
|                            | Male        | Reference     |                           | -     | -               |
| Age (years)                | 15-25       | 0.91          | *                         | 0.85  | 0.97            |
|                            | 26-40       | 0.98          |                           | 0.95  | 1.01            |
|                            | 41-65       | 0.99          |                           | 0.97  | 1.01            |
|                            | 66-85       | Reference     |                           | -     | -               |
| Urbanization <sup>4</sup>  | 1           | 1.18          | *                         | 1.14  | 1.23            |
|                            | 2           | 1.14          | *                         | 1.10  | 1.17            |
|                            | 3           | 1.08          | *                         | 1.04  | 1.12            |
|                            | 4           | 1.05          | *                         | 1.01  | 1.09            |
|                            | 5           | Reference     |                           | -     | -               |
| Deprived Neighbourhood     | Yes         | 1.04          | *                         | 1.01  | 1.08            |
|                            | No          | Reference     |                           | -     | -               |
| SNRI                       | Total       | 1.19          | *                         | 1.02  | 1.40            |
|                            | High dosage | 0.95          |                           | 0.82  | 1.10            |
|                            | Low dosage  | 0.99          |                           | 0.89  | 1.11            |
| SSRI                       | Total       | 1.03          | *                         | 1.004 | 1.07            |
| TCA                        | Total       | 1.19          | *                         | 1.06  | 1.32            |
|                            | High dosage | 1.07          |                           | 0.97  | 1.17            |
|                            | Low dosage  | 1.12          | *                         | 1.01  | 1.25            |
| Other AD                   |             | 1.08          | *                         | 1.03  | 1.14            |
| Antipsychotics             | Total       | 1.24          | *                         | 1.08  | 1.43            |
|                            | Classic     | 1.01          |                           | 0.88  | 1.15            |
|                            | Atypical    | 0.80          | *                         | 0.70  | 0.91            |
| Mood stabilizers           |             | 0.97          |                           | 0.85  | 1.10            |
| Sedatives                  |             | 1.31          | *                         | 1.29  | 1.34            |
| Migraine                   |             | 0.95          | *                         | 0.91  | 0.99            |
| Cardio Vascular Drugs      |             | 1.12          | *                         | 1.10  | 1.14            |
| Other Somatic Drug classes |             | 1.12          | *                         | 1.10  | 1.14            |

(1) Escalation = change to a higher level of analgesic potency

(2) Significant variable, p-value<0.05

(3) 95% CI: confidence interval

(4) 1 = highest level of urbanization

## Discussion

Escalation of chronic analgesic treatment was observed more often in urban areas and, independently, deprived neighbourhoods within urban areas, suggesting pain outcomes either are associated with individual characteristics that are more prevalent in urban and deprived areas, or subject to contextual influences, like area-level stress or social fragmentation, regardless of individual level characteristics. One individual level variable that may explain part of the association with urbanicity and deprivation is socio-economic status<sup>19 20</sup>, which was not available for inclusion in the model. Nevertheless, the fact that the association with urbanicity remained with deprivation adjusted for in the same model, suggests that urban effects may not be reducible entirely to individual-level socio-economic status.

Regardless of the underlying mechanism, results clearly echo findings of unconfounded higher rates of poor mental health in urban and deprived neighbourhood environments<sup>3 4 21</sup>, and suggest that the outcome of mental suffering associated with somatic disorders shows similar predictable variation. Functional pain syndromes and psychiatric disorders show high levels of interdependency<sup>22-27</sup>, and psychiatric conditions enhance severity of somatic symptoms<sup>28</sup>. Thus, part of the mechanism underlying the association between pharmacological pain escalation and urban environment may be explained by urbanization increasing the risk for mental ill health. This hypothesis is supported by the findings, as in both the Starter and the Continuation groups, escalation of chronic analgesic treatment was associated not only with urban environment and neighbourhood deprivation, but also with prescription of various psychotropic medications prescribed in association. In general, the positive association of escalating analgesic treatment with psychotropic medication was as strong or even stronger than the association

1  
2  
3 with prescribed somatic co-medication, with the exception of the observed de-escalating  
4  
5 effect, in the Continuation group, of second-generation antipsychotics, which possess  
6  
7 powerful analgesic properties<sup>29 30</sup>. This is accordance with the literature, given the fact that  
8  
9 psychiatric conditions can enhance symptom severity in somatic patients<sup>28</sup>, which  
10  
11 sometimes may impact even more that the somatic condition itself<sup>31</sup>.  
12  
13

14  
15 However, the question remains to what degree escalation of analgesic treatment and  
16  
17 its association with psychotropic medication reflects therapeutic efforts to remedy pain,  
18  
19 treatment of psychiatric comorbidity, or a cause of psychopathology. In the Starter and the  
20  
21 Continuation group of chronic analgesic treatment, escalation of analgesics was consistently  
22  
23 and positively associated with the use of TCA. This prescription habit may reflect routine  
24  
25 paradigms in the pharmacological treatment of pain syndromes<sup>10 23 32-34</sup>. However, given the  
26  
27 evidence regarding TCA's efficacy in pain conditions, negative rather than positive  
28  
29 associations with escalation of analgesics should have been expected. More likely, since the  
30  
31 association with TCAs was as strong as the association of sedatives with analgesic escalation,  
32  
33 it may be a reflection of affective or addictive comorbidity in persistent pain, for instance in  
34  
35 vulnerable cases of opiate-induced sensitization, tolerance and hyperalgesia<sup>35-41</sup>. Moreover,  
36  
37 escalation of analgesic treatment in starters of chronic analgesic treatment was even more  
38  
39 strongly associated with the use of TCA, sedatives, SNRI and antipsychotics, if prescribed  
40  
41 *after* the start of analgesics. One explanation for stronger associations of escalation in  
42  
43 analgesics with the use of psychotropic medication if started *after* initiation of analgesic  
44  
45 treatment may be that psychotropic medication was prescribed in the event of psychiatric  
46  
47 comorbidity occurring later in course of the syndrome occasioning the pain. This may be  
48  
49 considered likely, since many patients diagnosed with pain syndromes are suffering from  
50  
51 mood or anxiety disorders and functional somatic complaints<sup>37 42</sup>. Furthermore, under-  
52  
53  
54  
55  
56  
57  
58  
59  
60

1  
2  
3 detection of psychiatric comorbidity may occur early in the course of comorbid psychiatric  
4  
5 conditions<sup>25 27 28</sup>.

6  
7  
8 On the other hand, the strong association of psychotropic medication with escalation  
9  
10 of analgesics *after* start of analgesic treatment may reflect a direct effect of the  
11  
12 psychopharmacological intervention itself. Recent findings suggest that not opiates but  
13  
14 serotonin may be involved in the development of persisting pain<sup>43 44</sup>. This may also explain  
15  
16 why antidepressants show stronger positive associations with escalation of analgesic  
17  
18 treatment if started later, after the initial prescription of analgesics.  
19  
20

21  
22  
23 According to the literature<sup>23 32-35 45</sup>, negative associations of particularly  
24  
25 antidepressants with escalation of chronic analgesic treatment might have been expected.  
26  
27 As mentioned earlier, under-detection of psychiatric conditions early in the course of  
28  
29 analgesic treatment or effects of the pharmacological intervention itself may explain that  
30  
31 this is not the case<sup>24 27 37 46</sup>. Nevertheless, there are negative associations with escalation of  
32  
33 chronic analgesic treatment in, for example, pharmacological migraine treatment. Moreover,  
34  
35 the use of antipsychotics was negatively associated with analgesic escalation for the Starter  
36  
37 group if prescribed after start of analgesic treatment. In the Continuation group, de-  
38  
39 escalation was specifically associated with the use of atypical antipsychotics. This outcome is  
40  
41 interesting and deserves further investigation, given that limited evidence for the efficacy of  
42  
43 antipsychotics in pain conditions already exists<sup>29 30</sup>.

44  
45  
46  
47  
48  
49 The results of the current study should be seen in the light of several limitations. The  
50  
51 use of routine data rather than a targeted data collection could have caused more random  
52  
53 error resulting in type II error. Unidentified confounding may have played a role, as  
54  
55 randomization was not possible and pre-post designs are sensitive to effects of unmeasured  
56  
57  
58  
59  
60

1  
2  
3 changes affecting outcome measures over time. Another limitation is the lack of outcomes  
4  
5 other than urbanization, psychotropic medication or somatic co-medication. For instance,  
6  
7 there were no estimates regarding care consumption or illness-related sick leave. Changes in  
8  
9 patient-related outcomes like illness severity, global functioning, quality of life and  
10  
11 treatment satisfaction should also form part of prospective evaluations. Furthermore, this  
12  
13 study only collected data over a twelve-month period. Affect and pain monitoring deserves  
14  
15 longer evaluation. Finally, due to the study design, associations do not allow for causal  
16  
17 inference. Finally, due to the study design, associations do not allow for causal  
18  
19  
20  
21  
22

#### 23 WHAT IS ALREADY KNOWN ON THIS TOPIC

24  
25  
26  
27 Numerous observational studies have observed higher rates of poor mental health in  
28  
29 urban and deprived neighbourhood environments.  
30  
31  
32

33  
34 Pain syndromes and psychiatric disorders show high levels of interdependency, and  
35  
36 psychiatric conditions enhance severity of somatic symptoms.  
37  
38  
39

#### 40 WHAT THIS STUDY ADDS

41  
42  
43  
44 Escalation of chronic analgesic treatment in persistent pain is associated with urban  
45  
46 environments and deprived neighbourhoods, and occurs in a context of increased  
47  
48 levels of psychotropic medications, suggesting persistent pain outcomes are  
49  
50 associated with area influences affecting mental health.  
51  
52  
53  
54

55  
56 *Contributors:* CL, SB and JvO were principal investigators of the study. SB analysed the data  
57  
58 in collaboration with CL, JvO, and JS. CL and JvO drafted the paper. All authors contributed to  
59  
60

1  
2  
3 subsequent drafts of the paper, including the final version. JvO is guarantor.  
4  
5

6  
7 *External funding:* Eli Lilly provided funding to IMS Health for data analysis. External funding  
8  
9 did not support any other aspect of the study. All authors contributed independently from  
10  
11 funders to this study; and all authors had full access to and can take responsibility for the  
12  
13 data and analyses.  
14

15  
16  
17 *Competing interests:* All authors have completed the Unified Competing Interest form at  
18  
19 [www.icmje.org/coi\\_disclosure.pdf](http://www.icmje.org/coi_disclosure.pdf) (available on request from the corresponding author) and  
20  
21 declare: no support from any organisation for the submitted work, with the exception of  
22  
23 above-mentioned funding to IMS Health for data analysis; no financial relationships with any  
24  
25 organisation that might have an interest in the submitted work; and no other relationships  
26  
27 or activities that could appear to have influenced the submitted work.  
28  
29

30  
31  
32 *License for publication:* All authors grant an exclusive license (or non exclusive for  
33  
34 government employees) on a worldwide basis to the BMJ Publishing Group LTD and its  
35  
36 licensees, to permit this article (if accepted) to be published in BMJ editions and any other  
37  
38 BMJPG products and to exploit all subsidiary rights, as set out on:  
39  
40 <http://resources.bmj.com/bmj/authors/checklists-forms/license-for-publication>.  
41  
42  
43  
44  
45  
46  
47  
48  
49  
50  
51  
52  
53  
54  
55  
56  
57  
58  
59  
60

## References

1. Lofors J, Sundquist K. Low-linking social capital as a predictor of mental disorders: a cohort study of 4.5 million Swedes. *Social science & medicine (1982)* 2007;64(1):21-34.
2. Thomas H, Weaver N, Patterson J, Jones P, Bell T, Playle R, et al. Mental health and quality of residential environment. *Br J Psychiatry* 2007;191:500-5.
3. Ivory VC CS, Blakely T, Dew K. When does neighbourhood matter? Multilevel relationships between neighbourhood social fragmentation and mental health. *Social science & medicine (1982)* 2011;72:1993-2002.
4. Lederbogen F KP, Haddad L, Streit F, Tost H, Schuch P et al. City living and urban upbringing affect neural stress processing in humans. *Nature* 2011;474(7352):498-501.
5. Hubbard Cs LJ, Bueller J, Stains J, Suyenobu B, Dukes GE, et al. Corticotropin-releasing factor receptor 1 antagonist alters regional activation and effective connectivity in an emotional-arousal circuit during expectation of abdominal pain. *J Neurosci* 2011;31(35):12491-500.
6. Murrough JW HY, Hu J, Henry S, Williams W, Gallezot JD, et al. Reduced amygdala serotonin transporter binding in posttraumatic stress disorder. *Biol Psychiatry* 2011(Aug 17):[Epub ahead of print].
7. Smith HS HR, Clauw D. Fibromyalgia: an afferent processing disorder leading to a complex pain generalized syndrome. *Pain Physician* 2011;14(2):E217-45.
8. Price DD CJ, Zhou Q, Verne GN, Perlstein WM, Robinson ME. Widespread hyperalgesia in irritable bowel syndrome is dynamically maintained by tonic visceral impulse input and placebo/nocebo factors: evidence from human psychophysics, animal models and neuroimaging. *Neuroimage* 2009;47(3):995-1001.
9. Wise TN, Fishbain DA, Holder-Perkins V. Painful physical symptoms in depression: a clinical challenge. *Pain medicine (Malden, Mass 2007)*;8 Suppl 2:S75-82.
10. Goldenberg DL. Pain/Depression dyad: a key to a better understanding and treatment of functional somatic syndromes. *The American journal of medicine*;123(8):675-82.
11. Crump C, Sundquist K, Sundquist J, Winkleby MA. Neighborhood deprivation and psychiatric medication prescription: a Swedish national multilevel study. *Ann Epidemiol*;21(4):231-7.
12. Netelenbos JC, Geusens PP, Ypma G, Buijs SJ. Adherence and profile of non-persistence in patients treated for osteoporosis--a large-scale, long-term retrospective study in The Netherlands. *Osteoporos Int*;22(5):1537-46.
13. Buurma H, Bouvy ML, De Smet PA, Floor-Schreudering A, Leufkens HG, Egberts AC. Prevalence and determinants of pharmacy shopping behaviour. *Journal of clinical pharmacy and therapeutics* 2008;33(1):17-23.
14. McKenzie K, Samele C, Van Horn E, Tattan T, Van Os J, Murray R. Comparison of the outcome and treatment of psychosis in people of Caribbean origin living in the UK and British Whites. Report from the UK700 trial. *Br J Psychiatry* 2001;178:160-5.
15. Central Bureau of Statistics. Bevolking der gemeenten van Nederland. *The Hague, The Netherlands: CBS Publications* 1993.
16. Wiegers TA DW. Herijking stedelijke achterstandsgebieden. *Utrecht, The Netherlands: NIVEL publications* 2008.
17. Nza, tariefbeschikking 5000-1900-09-3, 30 juni 2009. <http://www.naz.nl/>.
18. <http://www.sas.com/>.



19. Drukker M, van Os J. Mediators of neighbourhood socioeconomic deprivation and quality of life. *Social psychiatry and psychiatric epidemiology* 2003;38(12):698-706.
20. Skapinakis P, Weich S, Lewis G, Singleton N, Araya R. Socio-economic position and common mental disorders. Longitudinal study in the general population in the UK. *Br J Psychiatry* 2006;189:109-17.
21. van Os J, Kenis G, Rutten BP. The environment and schizophrenia. *Nature*;468(7321):203-12.
22. Hotopf M, Mayou R, Wadsworth M, Wessely S. Temporal relationships between physical symptoms and psychiatric disorder. Results from a national birth cohort. *Br J Psychiatry* 1998;173:255-61.
23. Kroenke K, Jackson JL, Chamberlin J. Depressive and anxiety disorders in patients presenting with physical complaints: clinical predictors and outcome. *The American journal of medicine* 1997;103(5):339-47.
24. Barsky AJ, Orav EJ, Bates DW. Somatization increases medical utilization and costs independent of psychiatric and medical comorbidity. *Archives of general psychiatry* 2005;62(8):903-10.
25. Fink P, Hansen MS, Oxhøj ML. The prevalence of somatoform disorders among internal medical inpatients. *Journal of psychosomatic research* 2004;56(4):413-8.
26. Levy RL, Olden KW, Naliboff BD, Bradley LA, Francisconi C, Drossman DA, et al. Psychosocial aspects of the functional gastrointestinal disorders. *Gastroenterology* 2006;130(5):1447-58.
27. Leue C, Driessen G, Strik JJ, Drukker M, Stockbrugger RW, Kuijpers PM, et al. Managing complex patients on a medical psychiatric unit: an observational study of university hospital costs associated with medical service use, length of stay, and psychiatric intervention. *Journal of psychosomatic research*;68(3):295-302.
28. Meyer T, Klemme H, Herrmann C. Depression but not anxiety is a significant predictor of physicians' assessments of medical status in physically ill patients. *Psychotherapy and psychosomatics* 2000;69(3):147-54.
29. Freudenfeld RN, Murray M, Fuchs PN, Kiser RS. Decreased pain and improved quality of life in fibromyalgia patients treated with olanzapine, an atypical neuroleptic. *Pain Pract* 2006;6(2):112-8.
30. Seidel S, Aigner M, Ossege M, Pernicka E, Wildner B, Sycha T. Antipsychotics for acute and chronic pain in adults. *Cochrane database of systematic reviews (Online)* 2008(4):CD004844.
31. Kim KW, Han JW, Cho HJ, Chang CB, Park JH, Lee JJ, et al. Association between comorbid depression and osteoarthritis symptom severity in patients with knee osteoarthritis. *J Bone Joint Surg Am* 2011;93(6):556-63.
32. Hauser W, Bernardy K, Uceyler N, Sommer C. Treatment of fibromyalgia syndrome with antidepressants: a meta-analysis. *JAMA* 2009;301(2):198-209.
33. Ford AC, Talley NJ, Schoenfeld PS, Quigley EM, Moayyedi P. Efficacy of antidepressants and psychological therapies in irritable bowel syndrome: systematic review and meta-analysis. *Gut* 2009;58(3):367-78.
34. Saarto T, Wiffen PJ. Antidepressants for neuropathic pain. *Cochrane database of systematic reviews (Online)* 2007(4):CD005454.
35. Krebs EE, Gaynes BN, Gartlehner G, Hansen RA, Thieda P, Morgan LC, et al. Treating the physical symptoms of depression with second-generation antidepressants: a systematic review and metaanalysis. *Psychosomatics* 2008;49(3):191-8.

- 1  
2  
3 36. Arnold LM, Hudson JI, Wang F, Wohlreich MM, Prakash A, Kajdasz DK, et al. Comparisons  
4 of the efficacy and safety of duloxetine for the treatment of fibromyalgia in patients  
5 with versus without major depressive disorder. *Clin J Pain* 2009;25(6):461-8.  
6  
7 37. Arnold LM, Hudson JI, Keck PE, Auchenbach MB, Javaras KN, Hess EV. Comorbidity of  
8 fibromyalgia and psychiatric disorders. *J Clin Psychiatry* 2006;67(8):1219-25.  
9  
10 38. Bekhit MH. Opioid-induced hyperalgesia and tolerance. *Am J Ther* 2010;17(5):498-510.  
11  
12 39. Berton O, McClung CA, Dileone RJ, Krishnan V, Renthal W, Russo SJ, et al. Essential role of  
13 BDNF in the mesolimbic dopamine pathway in social defeat stress. *Science*  
14 2006;311(5762):864-8.  
15  
16 40. Upadhyay J, Maleki N, Potter J, Elman I, Rudrauf D, Knudsen J, et al. Alterations in brain  
17 structure and functional connectivity in prescription opioid-dependent patients.  
18 *Brain* 2010;133(Pt 7):2098-114.  
19  
20 41. Angst MS, Clark JD. Opioid-induced hyperalgesia: a qualitative systematic review.  
21 *Anesthesiology* 2006;104(3):570-87.  
22  
23 42. Aaron LA, Buchwald D. Chronic diffuse musculoskeletal pain, fibromyalgia and co-morbid  
24 unexplained clinical conditions. *Best Pract Res Clin Rheumatol* 2003;17(4):563-74.  
25  
26 43. Chu LF, Dairmont J, Zamora AK, Young CA, Angst MS. The endogenous opioid system is  
27 not involved in modulation of opioid-induced hyperalgesia. *J Pain* 2011;12(1):108-15.  
28  
29 44. Wei F, Dubner R, Zou S, Ren K, Bai G, Wei D, et al. Molecular depletion of descending  
30 serotonin unmasks its novel facilitatory role in the development of persistent pain. *J*  
31 *Neurosci* 2010;30(25):8624-36.  
32  
33 45. Rayner L, Price A, Evans A, Valsraj K, Higginson IJ, Hotopf M. Antidepressants for  
34 depression in physically ill people. *Cochrane database of systematic reviews (Online)*  
35 2010(3):CD007503.  
36  
37 46. Artigas F, Bel N, Casanovas JM, Romero L. Adaptive changes of the serotonergic system  
38 after antidepressant treatments. *Adv Exp Med Biol* 1996;398:51-9.  
39  
40  
41  
42  
43  
44  
45  
46  
47  
48  
49  
50  
51  
52  
53  
54  
55  
56  
57  
58  
59  
60

| Level   | Medication                |
|---------|---------------------------|
| Level 1 | Paracetamol               |
| Level 2 | Prostaglandine inhibitors |
| Level 3 | Anti-epileptics (a,b)     |
| Level 4 | Weak opiates (c)          |
| Level 5 | Strong opiates (d)        |

For peer review only

1  
2  
3  
4  
5  
6  
7  
8  
9  
10  
11  
12  
13  
14  
15  
16  
17  
18  
19  
20  
21  
22  
23  
24  
25  
26  
27  
28  
29  
30  
31  
32  
33  
34  
35  
36  
37  
38  
39  
40  
41  
42  
43  
44  
45  
46  
47  
48  
49  
50  
51  
52  
53  
54  
55  
56  
57  
58  
59  
60

|                            |  | Time (months)               |   |   |   |   |   |                    |             |   |    |    |         |         |
|----------------------------|--|-----------------------------|---|---|---|---|---|--------------------|-------------|---|----|----|---------|---------|
|                            |  | period prior to observation |   |   |   |   |   | observation period |             |   |    |    |         |         |
|                            |  | 1                           | 2 | 3 | 4 | 5 | 6 | 7                  | 8           | 9 | 10 | 11 | 12      |         |
| <b>starting patients</b>   |  | no Rx for analgesics        |   |   |   |   |   | first Rx           | Rx - Rx ... |   |    |    |         | last Rx |
| <b>continuing patients</b> |  | first Rx                    |   |   |   |   |   | Rx - Rx - Rx ...   |             |   |    |    | last Rx |         |

For peer review only

|                              | Item No | Recommendation                                                                                                                                                                                                                                                                                                                                                                                                                                                                                                                |
|------------------------------|---------|-------------------------------------------------------------------------------------------------------------------------------------------------------------------------------------------------------------------------------------------------------------------------------------------------------------------------------------------------------------------------------------------------------------------------------------------------------------------------------------------------------------------------------|
| <b>Title and abstract</b>    | 1       | (a) Indicate the study's design with a commonly used term in the title or the abstract DONE                                                                                                                                                                                                                                                                                                                                                                                                                                   |
|                              |         | (b) Provide in the abstract an informative and balanced summary of what was done and what was found DONE                                                                                                                                                                                                                                                                                                                                                                                                                      |
| <b>Introduction</b>          |         |                                                                                                                                                                                                                                                                                                                                                                                                                                                                                                                               |
| Background/rationale         | 2       | Explain the scientific background and rationale for the investigation being reported DONE                                                                                                                                                                                                                                                                                                                                                                                                                                     |
| Objectives                   | 3       | State specific objectives, including any prespecified hypotheses DONE                                                                                                                                                                                                                                                                                                                                                                                                                                                         |
| <b>Methods</b>               |         |                                                                                                                                                                                                                                                                                                                                                                                                                                                                                                                               |
| Study design                 | 4       | Present key elements of study design early in the paper DONE                                                                                                                                                                                                                                                                                                                                                                                                                                                                  |
| Setting                      | 5       | Describe the setting, locations, and relevant dates, including periods of recruitment, exposure, follow-up, and data collection DONE                                                                                                                                                                                                                                                                                                                                                                                          |
| Participants                 | 6       | (a) <i>Cohort study</i> —Give the eligibility criteria, and the sources and methods of selection of participants. Describe methods of follow-up DONE<br><i>Case-control study</i> —Give the eligibility criteria, and the sources and methods of case ascertainment and control selection. Give the rationale for the choice of cases and controls<br><i>Cross-sectional study</i> —Give the eligibility criteria, and the sources and methods of selection of participants                                                   |
|                              |         | (b) <i>Cohort study</i> —For matched studies, give matching criteria and number of exposed and unexposed<br><i>Case-control study</i> —For matched studies, give matching criteria and the number of controls per case                                                                                                                                                                                                                                                                                                        |
| Variables                    | 7       | Clearly define all outcomes, exposures, predictors, potential confounders, and effect modifiers. Give diagnostic criteria, if applicable DONE                                                                                                                                                                                                                                                                                                                                                                                 |
| Data sources/<br>measurement | 8*      | For each variable of interest, give sources of data and details of methods of assessment (measurement). Describe comparability of assessment methods if there is more than one group DONE                                                                                                                                                                                                                                                                                                                                     |
| Bias                         | 9       | Describe any efforts to address potential sources of bias DONE                                                                                                                                                                                                                                                                                                                                                                                                                                                                |
| Study size                   | 10      | Explain how the study size was arrived at DONE                                                                                                                                                                                                                                                                                                                                                                                                                                                                                |
| Quantitative variables       | 11      | Explain how quantitative variables were handled in the analyses. If applicable, describe which groupings were chosen and why DONE                                                                                                                                                                                                                                                                                                                                                                                             |
| Statistical methods          | 12      | (a) Describe all statistical methods, including those used to control for confounding DONE<br>(b) Describe any methods used to examine subgroups and interactions<br>(c) Explain how missing data were addressed<br>(d) <i>Cohort study</i> —If applicable, explain how loss to follow-up was addressed<br><i>Case-control study</i> —If applicable, explain how matching of cases and controls was addressed<br><i>Cross-sectional study</i> —If applicable, describe analytical methods taking account of sampling strategy |
|                              |         | (e) Describe any sensitivity analyses                                                                                                                                                                                                                                                                                                                                                                                                                                                                                         |

**Results**

|                  |     |                                                                                                                                                                                                                                                                                                                                                                                                                                       |
|------------------|-----|---------------------------------------------------------------------------------------------------------------------------------------------------------------------------------------------------------------------------------------------------------------------------------------------------------------------------------------------------------------------------------------------------------------------------------------|
| Participants     | 13* | (a) Report numbers of individuals at each stage of study—eg numbers potentially eligible, examined for eligibility, confirmed eligible, included in the study, completing follow-up, and analysed <b>DONE</b><br>(b) Give reasons for non-participation at each stage<br>(c) Consider use of a flow diagram <b>DONE</b>                                                                                                               |
| Descriptive data | 14* | (a) Give characteristics of study participants (eg demographic, clinical, social) and information on exposures and potential confounders <b>DONE</b><br>(b) Indicate number of participants with missing data for each variable of interest<br>(c) <i>Cohort study</i> —Summarise follow-up time (eg, average and total amount) <b>DONE</b>                                                                                           |
| Outcome data     | 15* | <i>Cohort study</i> —Report numbers of outcome events or summary measures over time <b>DONE</b><br><i>Case-control study</i> —Report numbers in each exposure category, or summary measures of exposure<br><i>Cross-sectional study</i> —Report numbers of outcome events or summary measures                                                                                                                                         |
| Main results     | 16  | (a) Give unadjusted estimates and, if applicable, confounder-adjusted estimates and their precision (eg, 95% confidence interval). Make clear which confounders were adjusted for and why they were included <b>DONE</b><br>(b) Report category boundaries when continuous variables were categorized <b>DONE</b><br>(c) If relevant, consider translating estimates of relative risk into absolute risk for a meaningful time period |
| Other analyses   | 17  | Report other analyses done—eg analyses of subgroups and interactions, and sensitivity analyses                                                                                                                                                                                                                                                                                                                                        |

**Discussion**

|                  |    |                                                                                                                                                                                        |
|------------------|----|----------------------------------------------------------------------------------------------------------------------------------------------------------------------------------------|
| Key results      | 18 | Summarise key results with reference to study objectives <b>DONE</b>                                                                                                                   |
| Limitations      | 19 | Discuss limitations of the study, taking into account sources of potential bias or imprecision. Discuss both direction and magnitude of any potential bias <b>DONE</b>                 |
| Interpretation   | 20 | Give a cautious overall interpretation of results considering objectives, limitations, multiplicity of analyses, results from similar studies, and other relevant evidence <b>DONE</b> |
| Generalisability | 21 | Discuss the generalisability (external validity) of the study results <b>DONE</b>                                                                                                      |

**Other information**

|         |    |                                                                                                                                                                           |
|---------|----|---------------------------------------------------------------------------------------------------------------------------------------------------------------------------|
| Funding | 22 | Give the source of funding and the role of the funders for the present study and, if applicable, for the original study on which the present article is based <b>DONE</b> |
|---------|----|---------------------------------------------------------------------------------------------------------------------------------------------------------------------------|

1  
2  
3 **Original article**  
4  
5

6 Urbanisation and neighbourhood  
7 deprivation impact chronic pharmacological pain treatment - a large  
8 scale longitudinal cohort study in the Netherlands  
9

10  
11 Carsten Leue, consultant <sup>\*1</sup>, Servaas Buijs, statistician<sup>2</sup>, Jacqueline Strik, consultant<sup>1</sup>, Richel  
12 Lousberg, lecturer<sup>1</sup>, Jasper Smit, statistician<sup>2</sup>, Maarten van Kleef, professor<sup>3</sup>, Jim van Os,  
13 professor<sup>1,4</sup>  
14  
15  
16  
17  
18  
19  
20  
21

22 <sup>1</sup> Department of Psychiatry and Psychology, South Limburg Mental Health Research and  
23 Teaching Network, EURON, Maastricht University Medical Centre, Maastricht, The  
24 Netherlands.  
25  
26  
27  
28

29  
30 <sup>2</sup> IMS Health BV, Capelle aan den IJssel, The Netherlands.  
31  
32

33 <sup>3</sup> Department of Anaesthesiology, Maastricht University Medical Centre, Maastricht, The  
34 Netherlands.  
35  
36  
37

38 <sup>4</sup> King's College London, King's Health Partners, Department of Psychosis Studies, Institute of  
39 Psychiatry, London, United Kingdom.  
40  
41  
42  
43  
44  
45  
46

47 \*Correspondence:  
48

49  
50 C. Leue, Department of Psychiatry and Medical Psychology, Maastricht University Medical  
51 Centre, PO BOX 616 (DRT 10), NL 6200 MD Maastricht, The Netherlands. Tel: ++31-43-  
52 3877444. Fax: ++31-43-3875444. E-mail: [c.leue@mumc.nl](mailto:c.leue@mumc.nl)  
53  
54  
55  
56  
57  
58  
59  
60

**Abstract:**

*Objective:* To examine whether urbanization and neighbourhood deprivation would impact chronic pharmacological pain treatment in terms of greater probability of analgesic escalation, predicted by prescriptions of psychotropic medication.

*Design:* Longitudinal analysis of a population-based routine prescription database in the Netherlands.

*Setting:* Representative sample of pharmacies and dispensing general practitioners, covering 73% of the Dutch nationwide medication consumption in primary care and outpatients.

*Participants:* 449,410 patients aged 15-85 years were included, of whom 166,374 were in the *Starter group* and 283,036 in the *Continuation group* of chronic analgesic treatment.

*Main outcome measure:* Escalation of analgesics (i.e. change to a higher level of analgesic potency, classified in five levels) in association with urbanization and dichotomous neighbourhood deprivation was analysed over a six-month observation period.

*Results:* In both *Starter* and *Continuation* groups, escalation was positively associated with urbanization in a dose response fashion (*Starter group*: OR (urbanization level 1 compared to level 5): 1.24; 95% CI 1.18 to 1.30; *Continuation group*: OR 1.19; 95% CI 1.14 to 1.23). A weak but independent association was apparent with neighbourhood deprivation (*Starter group*: OR 1.06; 95% CI 1.02 to 1.11; *Continuation group*: OR 1.04; 95% CI 1.01 to 1.08). Use of somatic and particularly psychotropic co-medication was independently associated with escalation in both groups.



1  
2  
3 *Conclusion:* Escalation of chronic analgesic treatment is associated with urban and deprived  
4 environments, and occurs in a context of psychotropic medication prescriptions, suggesting  
5 pain outcomes are influenced by area influences affecting mental health.  
6  
7  
8  
9  
10  
11  
12  
13  
14  
15  
16  
17  
18  
19  
20  
21  
22  
23  
24  
25  
26  
27  
28  
29  
30  
31  
32  
33  
34  
35  
36  
37  
38  
39  
40  
41  
42  
43  
44  
45  
46  
47  
48  
49  
50  
51  
52  
53  
54  
55  
56  
57  
58  
59  
60

For peer review only

## Introduction

The validity of the well-known epidemiological association between urban environment and mental health<sup>1-3</sup> is supported by work showing that urban living is associated with increased amygdala activity<sup>4</sup>, a key region in the regulation of stress, affective experience and pain<sup>5,6</sup>. Pain is the natural comorbid mental experience of somatic conditions<sup>7,8</sup>. In turn, pain is strongly influenced by comorbid mental disorders<sup>9,10</sup>. Given evidence of urban impact on risk for mental disorders, including psychiatric medication prescriptions<sup>11</sup>, we hypothesized that pain outcomes, indexed through prescriptions, would be poorer in urban environments and disadvantaged urban neighbourhoods. Pain outcomes were examined at the level of primary care and specialist outpatient care and defined in two ways: (i) escalation of analgesic treatment (i.e. prescription of more potent analgesics) and (ii) co-prescription of psychotropic medication in addition to analgesic treatment.

## Objective

We examined the hypothesis that chronic pharmacological pain treatment of outpatients and patients in primary care would show escalation of analgesics in association with the level of urbanization and neighbourhood index of deprivation. It was predicted that the highest levels of urbanization and neighbourhood deprivation would be associated with escalation of analgesic treatment to more potent pain medication (e.g. tramadol, morphine, methadone, etc.), while lower levels of urbanization and neighbourhood deprivation would be associated with less potent analgesics (e.g. paracetamol, aspirin, ibuprofen, etc.). Furthermore, we examined the hypothesis that escalation of analgesics would predict prescriptions of psychotropic medication (e.g. antidepressants, antipsychotics, mood

1  
2  
3 stabilizers, etc.) in patients prescribed chronic analgesic treatment. Study hypotheses were  
4  
5 specified before inspection of the data.  
6  
7  
8  
9

## 10 11 **Method**

### 12 13 *Data collection*

14  
15  
16  
17 The investigation was carried out by analysing records pertaining to Dutch routine general  
18  
19 practice and hospital outpatient treatment settings. Data were obtained from the IMS  
20  
21 Health's longitudinal prescription database (Lifelink, affiliate Capelle ad IJssel, The  
22  
23 Netherlands)<sup>12</sup>. This data source consists of anonymous longitudinal prescription records  
24  
25 from a representative sample of pharmacies and dispensing GPs, covering 73% of the Dutch  
26  
27 nationwide medication consumption of outpatients and primary care patients. The  
28  
29 computerized medication-dispensing histories contain data regarding dispensed  
30  
31 medications, type of prescriber, dispensing date, dispensed amount of medication,  
32  
33 prescribed dosage, and length of prescription. Data for each patient were anonymously and  
34  
35 independently sampled without linkage of prescriptions to the same patient across  
36  
37 pharmacies, because patients in the Netherlands are usually loyal to a single pharmacy<sup>13</sup>.  
38  
39 Potential bias caused by patients getting hospitalized, moving to another address or dying  
40  
41 was minimized by studying chronic pharmacological pain treatment.  
42  
43  
44  
45  
46  
47  
48  
49  
50  
51

### 52 53 *Patient groups*

54  
55 Patient selection started with the identification of chronic users of analgesic medication  
56  
57 during a six-month prescription period (hereafter: observation period). Chronic use was  
58  
59  
60

1  
2  
3 defined as in receipt of analgesic pharmacotherapy during at least two distinct moments  
4  
5 covering an interval of at least two months. In order to track medication for other  
6  
7 therapeutic indications (i.e. psychotropic medication and pharmaco-treatment for somatic  
8  
9 disorders), patients were observed for a period of six months prior to initiation of analgesic  
10  
11 treatment. Next, the cohort with chronic use of analgesics was divided into two groups.  
12  
13  
14 *Starters* were defined as patients who had not received any analgesics during the six-month  
15  
16 period prior to the observation period (hereafter: *Starter group*). Patients who *continued*  
17  
18 with pain medication that was already prescribed in the six month before the observation  
19  
20 period formed the second group (hereafter: *Continuation group*). The latter group consisted  
21  
22 of all patients who had already received analgesics in the first month of the six-month period  
23  
24 prior to the observation period, in order to define chronic analgesic treatment before  
25  
26 observation (Figure 1).  
27  
28  
29  
30  
31  
32

33 **Figure 1: Starter group and Continuation Group of chronic analgesic treatment**  
34  
35  
36

37 Insert Figure 1  
38  
39  
40

41 Legend: Schedule of prescriptions (Rx) in Starter group (top) and Continuation group (bottom) of  
42 chronic analgesic treatment covering a 12 month period. Months 7 to 12 are the observation period,  
43 months 1 to 6 and the pre-observation period.  
44  
45  
46  
47  
48

49 Data were obtained from the LRx database from month one to twelve as depicted in  
50  
51 Figure 1. Statistics were executed at sample level and no projection was applied. Use of  
52  
53 other medications (e.g. psychotropic medication and medication for a broad spectrum of  
54  
55 somatic conditions) was collected for all patients as well, covering the period of twelve  
56  
57  
58  
59  
60

1  
2  
3 months, consisting of (i) the pre-observation period (month one to six) and (ii) the  
4  
5 observation period (month seven to twelve)).  
6  
7  
8  
9

### 10 11 *Escalation of pharmacological pain treatment*

12  
13  
14 All individual prescriptions of analgesics were observed for each patient in both the Starter  
15  
16 and Continuation groups during the observation period and during the six months prior to  
17  
18 the observation period. At each dispensing date, analgesics were classified *a priori* in five  
19  
20 levels, in order of analgesic potency (Figure 2).  
21  
22  
23  
24  
25  
26  
27

### 28 **Figure 2: Level of analgesic potency\***

29  
30  
31 Insert Figure 2  
32  
33  
34

#### 35 Legend:

- 36 \* Level 1 (i.e. lowest potency) to level 5 (i.e. highest potency)  
37 (a) Gabapentine, pregabalin and no other anti-epileptic drugs  
38 (b) Carbamazepine, valproic acid, lamotrigine and medication of level 1 or 2  
39 (c) Tramadol, codeine  
40 (d) Methadone, oxycodone, hydromorphone, morphine, buprenorphine, fentanyl, sufentanil,  
41 pethidine  
42  
43  
44

45 Confirmation of escalation during the observation period was based on the  
46  
47 comparison of analgesic potency at the first dispensing day and the last day of prescription.  
48  
49 The comparison of first and last prescription of analgesics resulted in the following  
50  
51 categories of analgesic escalation: neutral (i.e. no change of analgesic potency), escalation in  
52  
53 analgesic treatment (i.e. change to a higher level of analgesic potency), or de-escalation in  
54  
55 pharmacological pain treatment (i.e. change to a lower analgesic potency) (Table 1).  
56  
57  
58  
59  
60

1  
2  
3 If patients received several analgesics on the same day, both the highest and the  
4  
5 second highest level of analgesic potency were included in the analyses, in order to define  
6  
7 escalation categories (e.g. a change from level 5 plus level 2 to level 5 plus level 3 indicating  
8  
9 that escalation had occurred).  
10  
11

### 12 13 14 15 16 *Determinants of escalation in analgesic treatment* 17

18  
19 Three groups of variables hypothesized to act as mediators or confounders were included in  
20  
21 the analyses. The first group were patient characteristics such as sex (0=men, 1=women),  
22  
23 age (in years) and the location of patient's pharmacy (defined by postal code). The latter  
24  
25 variable defined the level of urbanization following the definition of the Dutch Central  
26  
27 Bureau of Statistics (level 1 = highest level of urbanisation, to level 5 = rural environment;  
28  
29 described in more detail elsewhere<sup>14 15</sup>) and dichotomously defined neighbourhood  
30  
31 deprivation (0=no, 1=yes). The dichotomous measure of neighbourhood deprivation was  
32  
33 developed by the Netherlands Institute of Research in Healthcare (NIVEL), using socio-  
34  
35 economic indicators such as unemployment rate, average income, population density and  
36  
37 ethnic variation<sup>16</sup>. Healthcare professionals receive higher levels of funding for their services  
38  
39 in these deprived areas<sup>17</sup>. Neighbourhood deprivation was associated with level of  
40  
41 urbanization: 86% of the sample living in deprived neighbourhoods lived in an area with the  
42  
43 highest level of urbanization. Moreover, the other patients (14%) living in deprived  
44  
45 neighbourhoods lived in an area with the second highest level of urbanization.  
46  
47  
48  
49  
50  
51

52  
53 Furthermore, psychotropic co-medication was classified into its different classes, and  
54  
55 somatic co-medication was similarly grouped in 10 classes (ACE inhibitors, angiotensine II  
56  
57 inhibitors; antidiabetics; beta-blockers; calcium antagonists; functional bowel drugs;  
58  
59  
60

1  
2  
3 laxatives; migraine medication; respiratory medication; steroid-antiphlogistics; stomach  
4 protectors) (Table 1 to 3). In the Starting group, occurrence of co-medication was time-  
5 coded at three levels according to day of first occurrence (i.e. co-medication prescription  
6 before start with analgesics, at the same day or after start of analgesic treatment) (Table 2).  
7  
8 In the Continuation group, occurrence of co-medication was recorded dichotomously  
9 (presence/absence), since it was impossible to distinguish occurrence of co-medication as  
10 before or at start of analgesic treatment (Table 3).  
11  
12  
13  
14  
15  
16  
17  
18  
19  
20  
21  
22

### 23 *Statistical analysis*

24  
25  
26 First, we analysed the pattern of (de-) escalation in analgesic treatment by means of an  
27 ordered logistic multivariable regression model with adjusted odds ratios (and 95%  
28 confidence interval) using SAS version 9.1<sup>18</sup>. Statistical significance for the model was  
29 defined at conventional alpha of 0.05. The dependent variable in this model was the  
30 development of a patient's analgesic treatment (de-escalation, neutral, escalation).  
31  
32 Independent variables, entered simultaneously in the model, were demographic  
33 characteristics, neighbourhood deprivation, and urbanization, use of psychotropic  
34 medication and use of somatic medication. In the Starting group, we also included first  
35 occurrence of co-medication. The significance of the model and the adjusted R-square value  
36 were used to assess model reliability. Models for Starter and Continuation groups were run  
37 separately, given different sample selection criteria. Proportional odds were assumed in the  
38 models of escalation and de-escalation of analgesic treatment, and analyses inspected for  
39 violation of this assumption. If a determinant was positively associated with escalation of  
40 analgesics, absence of this variable was associated negatively with escalation or positively  
41  
42  
43  
44  
45  
46  
47  
48  
49  
50  
51  
52  
53  
54  
55  
56  
57  
58  
59  
60

1  
2  
3  
4  
5  
6  
7  
8  
9  
10  
11  
12  
13  
14  
15  
16  
17  
18  
19  
20  
21  
22  
23  
24  
25  
26  
27  
28  
29  
30  
31  
32  
33  
34  
35  
36  
37  
38  
39  
40  
41  
42  
43  
44  
45  
46  
47  
48  
49  
50  
51  
52  
53  
54  
55  
56  
57  
58  
59  
60

|  |               |                    |
|--|---------------|--------------------|
|  | Starter group | Continuation Group |
|--|---------------|--------------------|

with de-escalation in analgesic treatment (and vice versa). This offered advantage compared to separate models for escalation and de-escalation (such as consistency of model estimates) and avoided double use of patients with a neutral development of analgesic treatment.

## Results

Overall, 449,410 patients were included, of which 166,374 were in the Starter group and 283,036 in the Continuation group. The baseline characteristics of both groups are shown in table 1.

**Table 1: Baseline characteristics of the patient population with chronic analgesic treatment**



|             |                                        | Deprived<br>nb.hoods | Urbanicity <sup>1</sup><br>1 | Urbanicity<br>2-5 | Deprived<br>nb. hoods | Urbanicity<br>1 | Urbanicity<br>2-5 |
|-------------|----------------------------------------|----------------------|------------------------------|-------------------|-----------------------|-----------------|-------------------|
| Patients    | (Absolute)                             | 12,485               | 45,458                       | 120,916           | 21,799                | 78,358          | 204,678           |
| Change in   | Analgesics <sup>2</sup>                |                      |                              |                   |                       |                 |                   |
|             | De-escalation                          | 13.3%                | 12.1%                        | 10.4%             | 13.2%                 | 12.5%           | 11.2%             |
|             | Neutral                                | 70.1%                | 71.6%                        | 74.5%             | 70.0%                 | 71.4%           | 73.7%             |
|             | Escalation                             | 16.5%                | 16.3%                        | 15.1%             | 16.8%                 | 16.1%           | 15.1%             |
| Gender      | Male                                   | 39.8%                | 39.3%                        | 40.3%             | 36.7%                 | 35.2%           | 34.6%             |
|             | Female                                 | 60.2%                | 60.7%                        | 59.7%             | 63.3%                 | 64.8%           | 65.4%             |
| Age (years) | 15-25                                  | 6.3%                 | 6.1%                         | 6.5%              | 1.8%                  | 1.6%            | 1.8%              |
|             | 26-40                                  | 23.8%                | 19.2%                        | 16.3%             | 14.0%                 | 10.8%           | 9.7%              |
|             | 41-65                                  | 50.0%                | 49.6%                        | 50.9%             | 56.9%                 | 53.4%           | 51.8%             |
|             | 65-85                                  | 19.8%                | 25.2%                        | 26.2%             | 27.3%                 | 34.2%           | 36.7%             |
| First       | Analgesics                             |                      |                              |                   |                       |                 |                   |
|             | Level 1                                | 3.2%                 | 3.9%                         | 4.0%              | 3.0%                  | 3.8%            | 4.1%              |
|             | Level 2                                | 64.8%                | 66.6%                        | 72.6%             | 47.8%                 | 47.1%           | 53.6%             |
|             | Level 3                                | 2.2%                 | 2.5%                         | 2.6%              | 6.4%                  | 8.1%            | 8.9%              |
|             | Level 4                                | 27.4%                | 24.2%                        | 18.3%             | 36.1%                 | 33.9%           | 27.6%             |
|             | Level 5                                | 2.4%                 | 2.9%                         | 2.6%              | 6.8%                  | 7.2%            | 5.9%              |
|             | level 4/5                              | 29.8%                | 27.0%                        | 20.8%             | 42.8%                 | 41.1%           | 33.5%             |
| Last        | Analgesics                             |                      |                              |                   |                       |                 |                   |
|             | Level 1                                | 3.4%                 | 3.9%                         | 4.0%              | 3.4%                  | 4.1%            | 4.3%              |
|             | Level 2                                | 61.9%                | 63.0%                        | 68.4%             | 44.5%                 | 44.1%           | 50.1%             |
|             | Level 3                                | 3.0%                 | 3.3%                         | 3.4%              | 7.0%                  | 8.4%            | 9.2%              |
|             | Level 4                                | 27.6%                | 24.6%                        | 18.9%             | 36.8%                 | 34.5%           | 28.4%             |
|             | Level 5                                | 4.1%                 | 5.2%                         | 5.3%              | 8.3%                  | 9.0%            | 7.9%              |
|             | Level 4/5                              | 31.7%                | 29.8%                        | 24.2%             | 45.1%                 | 43.4%           | 36.3%             |
| Concomitant | Medication <sup>3</sup>                |                      |                              |                   |                       |                 |                   |
|             | Any concomitant drug                   | 78.8%                | 79.0%                        | 77.3%             | 89.3%                 | 89.6%           | 88.0%             |
|             | Migraine medication                    | 3.9%                 | 3.6%                         | 3.8%              | 5.9%                  | 5.2%            | 5.1%              |
|             | Any psychotropic medication            | 35.1%                | 36.6%                        | 34.8%             | 51.6%                 | 53.2%           | 50.2%             |
|             | TCA                                    | 5.2%                 | 5.0%                         | 5.0%              | 9.5%                  | 9.4%            | 9.6%              |
|             | Other AD                               | 2.4%                 | 2.0%                         | 1.6%              | 4.0%                  | 3.3%            | 2.7%              |
|             | Antipsychotics total                   | 4.1%                 | 3.9%                         | 3.1%              | 6.7%                  | 6.1%            | 4.9%              |
|             | Antipsychotics atypical                | 2.4%                 | 2.2%                         | 1.5%              | 4.1%                  | 3.5%            | 2.5%              |
|             | Antipsychotics classic                 | 2.0%                 | 2.1%                         | 1.8%              | 3.2%                  | 3.2%            | 2.7%              |
|             | Burpropion                             | 0.1%                 | 0.1%                         | 0.1%              | 0.2%                  | 0.2%            | 0.1%              |
|             | MAO inhibitors                         | 0.0%                 | 0.0%                         | 0.1%              | 0.1%                  | 0.1%            | 0.1%              |
|             | Mood stabilizers                       | 0.2%                 | 0.3%                         | 0.2%              | 0.3%                  | 0.4%            | 0.4%              |
|             | Sedatives                              | 27.0%                | 29.0%                        | 27.4%             | 41.5%                 | 43.4%           | 40.6%             |
|             | SNRI                                   | 2.6%                 | 2.4%                         | 2.2%              | 4.5%                  | 4.0%            | 3.5%              |
|             | SSRI                                   | 7.5%                 | 7.0%                         | 6.4%              | 10.3%                 | 10.0%           | 9.0%              |
|             | Psycho-stimulants                      | 0.4%                 | 0.5%                         | 0.5%              | 0.3%                  | 0.5%            | 0.4%              |
|             | Any somatic medication                 | 72.3%                | 72.6%                        | 71.0%             | 83.0%                 | 82.9%           | 81.7%             |
|             | Cardiovascular medication <sup>4</sup> | 30.9%                | 31.4%                        | 30.8%             | 35.2%                 | 34.9%           | 34.9%             |
|             | Other Somatic medication <sup>5</sup>  | 65.2%                | 65.5%                        | 64.0%             | 76.9%                 | 76.7%           | 75.4%             |

Legend: Patient characteristics are presented as percentages (e.g. age, gender, level of analgesic treatment, change in analgesic treatment (e.g. escalation, de-escalation, and neutral development of prescriptions), and concomitant medication). Absolute patient numbers are presented for the Starter and the Continuation group of chronic analgesic treatment concerning level of urbanicity and for neighbourhood deprivation.

- (1) Urbanicity = Urbanization (level 1 = highest level of urbanization; level 5 = rural environment)
- (2) Change in pain medication from first to last prescription (neutral = no change in level of potency, escalation = change to a higher level of analgesic potency, de-escalation = change to lower analgesic potency)

- 1
- 2
- 3 (3) Concomitant drug use, observed during a period of 12 month
- 4
- 5 (4) Cardiovascular medication: beta-blocker, calcium antagonist, ACE inhibitor, angiotensine II
- 6 inhibitor
- 7
- 8 (5) Gastro-intestinal medication: anti-diabetics, steroid-antiphogistics, respiratory medication
- 9
- 10
- 11
- 12

13 About 7.6% of all escalating patients were residing in a deprived neighbourhood, and  
14 approximately 27.6% were living in the most densely populated areas (urbanization level 1)  
15 (Table 1). The majority was female, and there were more patients showing escalation  
16 (15.4%) than de-escalation (11.3%) of analgesic treatment. The majority of patients  
17 continued a neutral analgesic treatment regime (73.3%) (Table 1). Most of the patients were  
18 treated at level 2 or level 4 of analgesic potency. Almost all patients were using other  
19 medications, regardless of the different categories in table 1 (84.5%). Around half were using  
20 psychotropic medication (45.2%), most were using somatic co-medication (78.1%), and more  
21 than a third were using both (38.8%) (Table 1).  
22  
23  
24  
25  
26  
27  
28  
29  
30  
31  
32  
33  
34

35 The Starter group mainly initiated an analgesic at level 2 (70.9%) and level 4 (19.9),  
36 whereas only 2.6% directly initiated at level 5. However, analgesic potency level 4 and 5  
37 increased up to 20.5% respectively 5.2% by the time of the last prescription in the Starter  
38 group (Table 1).  
39  
40  
41  
42  
43  
44

45 In the Continuation group, patients already received analgesics at a higher level of  
46 potency at inclusion compared to the last observed level of medication potency in the  
47 Starter group. Level 4 and 5 was observed in 35.6% at the start of the observation period,  
48 increasing to 38.3% at the end of observation period (Table 1).  
49  
50  
51  
52  
53  
54

55 Escalation of analgesic treatment was observed more often in deprived  
56 neighbourhoods and the most densely populated areas (16.8% and 16.1% in the  
57  
58  
59  
60

1  
2  
3 Continuation group, respectively 16.5% and 16.3% in the Starting group) compared to lower  
4  
5 densely populated areas (15.1%) and non-deprived neighbourhoods (15.3.%) (Table 1). The  
6  
7 proportion of patients with neutral development of analgesic treatment was lower in  
8  
9 deprived neighbourhoods and areas with the highest degree of urbanization compared to  
10  
11 less densely populated areas (Table 1).  
12  
13

14  
15 In the Starter group, escalation was positively associated with lower level of first  
16  
17 observed pain medication. Escalation was furthermore associated, in a dose-response  
18  
19 fashion, with level of urbanization (highest adjusted Odds Ratio (OR) 1.24 at level 1; 95%  
20  
21 Confidence Interval (CI) 1.18 to 1.30; compared to reference level 5) (Table 2). Furthermore,  
22  
23 a weak but independent association existed between escalation and neighbourhood  
24  
25 deprivation (OR 1.06; 95% CI 1.02 to 1.11) (Table 2). Use of tricyclic antidepressants (TCA),  
26  
27 mood stabilizers (OR 1.36; 95% CI 1.07 to 1.42), sedatives, cardiovascular medication (OR  
28  
29 1.16; 95% CI 1.13 to 1.19) and medications for other somatic conditions was associated with  
30  
31 analgesics escalation, when prescribed *before* start of analgesics (Table 2). Similarly, in the  
32  
33 Starter group, escalation of analgesic treatment was also associated with the use of selective  
34  
35 noradrenalin serotonin reuptake inhibitors (SNRI), sedatives (OR 1.82; 95% CI 1.74 to 1.89),  
36  
37 TCA (OR 2.19; 95% CI 2.03 to 2.36), and antipsychotics (OR 2.43; 95% CI 2.19 to 2.68) when  
38  
39 prescribed *after* start of analgesics (Table 2). Negative associations with escalation (i.e.  
40  
41 positive association with de-escalation) were apparent for younger age, female sex, and  
42  
43 pharmacological migraine treatment. Furthermore, use of antipsychotics was negatively  
44  
45 associated with escalation if started *simultaneously* with analgesic treatment (OR 0.70; 95%  
46  
47 CI 0.58 to 0.84) (Table 2).  
48  
49  
50  
51  
52  
53  
54  
55  
56  
57  
58  
59  
60

1  
2  
3  
4  
5  
6  
7  
8  
9  
10  
11  
12  
13  
14  
15  
16  
17  
18  
19  
20  
21  
22  
23  
24  
25  
26  
27  
28  
29  
30  
31  
32  
33  
34  
35  
36  
37  
38  
39  
40  
41  
42  
43  
44  
45  
46  
47  
48  
49  
50  
51  
52  
53  
54  
55  
56  
57  
58  
59  
60

The use of selective serotonin reuptake inhibitors (SSRI), before, at or after start of analgesic treatment was not associated with escalation of analgesics in the Starter group (Table 2).

**Table 2: Associations with escalation<sup>1</sup> in pharmacological pain treatment for the *Starter Group* of chronic analgesic treatment**

For peer review only

| Exposure                  |                                         | Adj. Odds Ratio | Significance <sup>2</sup> | 95% Lower | CI <sup>3</sup> Upper |
|---------------------------|-----------------------------------------|-----------------|---------------------------|-----------|-----------------------|
| Analgesics                | Level 1                                 | 58.23           | *                         | 53.60     | 63.27                 |
|                           | Level 2                                 | 17.92           | *                         | 16.75     | 19.16                 |
|                           | Level 3                                 | 4.66            | *                         | 4.23      | 5.14                  |
|                           | Level 4                                 | 1.36            | *                         | 1.27      | 1.45                  |
|                           | Level 5                                 | Reference       |                           | -         | -                     |
| Gender                    | Female                                  | 0.97            | *                         | 0.95      | 0.99                  |
|                           | Male                                    | Reference       |                           | 0.00      | 0.00                  |
| Age (years)               | 15-25                                   | 0.73            | *                         | 0.69      | 0.77                  |
|                           | 26-40                                   | 0.81            | *                         | 0.78      | 0.84                  |
|                           | 41-65                                   | 0.87            | *                         | 0.85      | 0.90                  |
|                           | 66-85                                   | Reference       |                           | -         | -                     |
| Urbanization <sup>4</sup> | 1                                       | 1.24            | *                         | 1.18      | 1.30                  |
|                           | 2                                       | 1.16            | *                         | 1.11      | 1.22                  |
|                           | 3                                       | 1.11            | *                         | 1.06      | 1.17                  |
|                           | 4                                       | 1.07            | *                         | 1.02      | 1.13                  |
|                           | 5                                       | Reference       |                           | -         | -                     |
| Deprived Neighbourhood    | Yes                                     | 1.07            | *                         | 1.02      | 1.11                  |
|                           | No                                      | Reference       |                           | -         | -                     |
| SNRI                      | <sup>5</sup> Before start of analgesics | 1.05            | -                         | 0.96      | 1.14                  |
|                           | Same start date                         | 1.28            | -                         | 0.97      | 1.69                  |
|                           | After analgesics started                | 1.26            | *                         | 1.09      | 1.45                  |
|                           | None                                    | Reference       |                           | -         | -                     |
| SSRI                      | Before start of analgesics              | 0.97            | -                         | 0.92      | 1.02                  |
|                           | Same start date                         | 0.97            | -                         | 0.83      | 1.15                  |
|                           | After analgesics started                | 1.07            | -                         | 0.97      | 1.18                  |
|                           | None                                    | Reference       |                           | -         | -                     |
| TCA                       | Before start of analgesics              | 1.23            | *                         | 1.15      | 1.32                  |
|                           | Same start date                         | 1.32            | *                         | 1.12      | 1.54                  |
|                           | After analgesics started                | 2.19            | *                         | 2.03      | 2.36                  |
|                           | None                                    | Reference       |                           | -         | -                     |
| Other AD                  | Before start of analgesics              | 1.03            | -                         | 0.93      | 1.15                  |
|                           | Same start date                         | 0.93            | -                         | 0.71      | 1.21                  |
|                           | After analgesics started                | 1.22            | *                         | 1.06      | 1.42                  |
|                           | None                                    | Reference       |                           | -         | -                     |
| Antipsychotics            | Before start of analgesics              | 0.92            | -                         | 0.85      | 1.01                  |
|                           | Same start date                         | 0.69            | *                         | 0.58      | 0.83                  |
|                           | After analgesics started                | 2.42            | *                         | 2.18      | 2.67                  |
|                           | None                                    | Reference       |                           | -         | -                     |
| Mood stabilizers          | Before start of analgesics              | 1.40            | *                         | 1.10      | 1.79                  |
|                           | Same start date                         | 0.91            | -                         | 0.43      | 1.89                  |
|                           | After analgesics started                | 0.71            | -                         | 0.39      | 1.31                  |
|                           | None                                    | Reference       |                           | -         | -                     |
| Sedatives                 | Before start of analgesics              | 1.24            | *                         | 1.20      | 1.28                  |
|                           | Same start date                         | 1.25            | *                         | 1.18      | 1.33                  |
|                           | After analgesics started                | 1.82            | *                         | 1.74      | 1.89                  |
|                           | None                                    | Reference       |                           | -         | -                     |
| Cardio-Vascular drugs     | Before start of analgesics              | 1.16            | *                         | 1.13      | 1.19                  |
|                           | Same start date                         | 0.86            | *                         | 0.79      | 0.95                  |
|                           | After analgesics started                | 1.35            | *                         | 1.26      | 1.45                  |
|                           | None                                    | Reference       |                           | -         | -                     |
| Other Somatic drugs       | Before start of analgesics              | 1.25            | *                         | 1.22      | 1.29                  |
|                           | Same start date                         | 1.11            | *                         | 1.07      | 1.15                  |
|                           | After analgesics started                | 1.19            | *                         | 1.15      | 1.23                  |
|                           | None                                    | Reference       |                           | -         | -                     |
| Migraine medication       | Before start of analgesics              | 0.83            | *                         | 0.77      | 0.89                  |
|                           | Same start date                         | 0.95            | -                         | 0.78      | 1.17                  |
|                           | After analgesics started                | 0.91            | -                         | 0.81      | 1.02                  |
|                           | None                                    | Reference       |                           | -         | -                     |

- (1) Escalation = change to a higher level of analgesic potency
- (2) Significant variable, p-value<0.05
- (3) 95% CI: confidence interval
- (4) 1 = highest level of urbanization, 5 = rural environment
- (5) Starting date of medication (before, at the same day or after start of analgesics)

In the Continuation group, escalation of analgesics was positively associated with lowest levels of first observed analgesics. Furthermore, escalation was associated with level of urbanization in a dose response fashion (highest adjusted OR 1.19 at level 1; 95% CI 1.14 to 1.23; compared to reference level 5) (Table 3). There was also an association between escalation and deprived neighbourhoods, use of SSRI, SNRI, TCA, all antipsychotics, and sedatives (OR 1.31; 95% CI 1.29 to 1.33) as well as use of somatic co-medication (OR 1.12; 95% CI 1.10 to 1.14) (Table 3). De-escalation was associated with female sex, younger age, treatment of migraine, and use of second-generation antipsychotics (OR 0.80; 95% CI 0.70 to 0.91) (Table 3).

**Table 3: Associations with escalation<sup>1</sup> in pharmacological pain treatment for the *Continuation Group* of chronic analgesic treatment**

| Exposure                   |             | Adjusted Odds | Significance <sup>2</sup> | 95%   | CI <sup>3</sup> |
|----------------------------|-------------|---------------|---------------------------|-------|-----------------|
|                            |             | Ratio         |                           | Lower | Upper           |
| Analgesics                 | Level 1     | 16.00         | *                         | 15.20 | 16.85           |
|                            | Level 2     | 7.87          | *                         | 7.59  | 8.16            |
|                            | Level 3     | 3.14          | *                         | 3.00  | 3.28            |
|                            | Level 4     | 1.55          | *                         | 1.50  | 1.61            |
|                            | Level 5     | Reference     |                           | -     | -               |
| Gender                     | Female      | 0.96          | *                         | 0.94  | 0.98            |
|                            | Male        | Reference     |                           | -     | -               |
| Age (years)                | 15-25       | 0.91          | *                         | 0.85  | 0.97            |
|                            | 26-40       | 0.98          |                           | 0.95  | 1.01            |
|                            | 41-65       | 0.99          |                           | 0.97  | 1.01            |
|                            | 66-85       | Reference     |                           | -     | -               |
| Urbanization <sup>4</sup>  | 1           | 1.18          | *                         | 1.14  | 1.23            |
|                            | 2           | 1.14          | *                         | 1.10  | 1.17            |
|                            | 3           | 1.08          | *                         | 1.04  | 1.12            |
|                            | 4           | 1.05          | *                         | 1.01  | 1.09            |
|                            | 5           | Reference     |                           | -     | -               |
| Deprived Neighbourhood     | Yes         | 1.04          | *                         | 1.01  | 1.08            |
|                            | No          | Reference     |                           | -     | -               |
| SNRI                       | Total       | 1.19          | *                         | 1.02  | 1.40            |
|                            | High dosage | 0.95          |                           | 0.82  | 1.10            |
|                            | Low dosage  | 0.99          |                           | 0.89  | 1.11            |
| SSRI                       | Total       | 1.03          | *                         | 1.004 | 1.07            |
| TCA                        | Total       | 1.19          | *                         | 1.06  | 1.32            |
|                            | High dosage | 1.07          |                           | 0.97  | 1.17            |
|                            | Low dosage  | 1.12          | *                         | 1.01  | 1.25            |
| Other AD                   |             | 1.08          | *                         | 1.03  | 1.14            |
| Antipsychotics             | Total       | 1.24          | *                         | 1.08  | 1.43            |
|                            | Classic     | 1.01          |                           | 0.88  | 1.15            |
|                            | Atypical    | 0.80          | *                         | 0.70  | 0.91            |
| Mood stabilizers           |             | 0.97          |                           | 0.85  | 1.10            |
| Sedatives                  |             | 1.31          | *                         | 1.29  | 1.34            |
| Migraine                   |             | 0.95          | *                         | 0.91  | 0.99            |
| Cardio Vascular Drugs      |             | 1.12          | *                         | 1.10  | 1.14            |
| Other Somatic Drug classes |             | 1.12          | *                         | 1.10  | 1.14            |

(1) Escalation = change to a higher level of analgesic potency

(2) Significant variable, p-value<0.05

(3) 95% CI: confidence interval

(4) 1 = highest level of urbanization

## Discussion

Escalation of chronic analgesic treatment was observed more often in urban areas and, independently, deprived neighbourhoods within urban areas, suggesting pain outcomes either are associated with individual characteristics that are more prevalent in urban and deprived areas, or subject to contextual influences, like area-level stress or social fragmentation, regardless of individual level characteristics. One individual level variable that may explain part of the association with urbanicity and deprivation is socio-economic status<sup>19 20</sup>, which was not available for inclusion in the model. Nevertheless, the fact that the association with urbanicity remained with deprivation adjusted for in the same model, suggests that urban effects may not be reducible entirely to individual-level socio-economic status.

Regardless of the underlying mechanism, results clearly echo findings of unconfounded higher rates of poor mental health in urban and deprived neighbourhood environments<sup>3 4 21</sup>, and suggest that the outcome of mental suffering associated with somatic disorders shows similar predictable variation. Functional pain syndromes and psychiatric disorders show high levels of interdependency<sup>22-27</sup>, and psychiatric conditions enhance severity of somatic symptoms<sup>28</sup>. Thus, part of the mechanism underlying the association between pharmacological pain escalation and urban environment may be explained by urbanization increasing the risk for mental ill health. This hypothesis is supported by the findings, as in both the Starter and the Continuation groups, escalation of chronic analgesic treatment was associated not only with urban environment and neighbourhood deprivation, but also with prescription of various psychotropic medications prescribed in association. In general, the positive association of escalating analgesic treatment with psychotropic medication was as strong or even stronger than the association



1  
2  
3 with prescribed somatic co-medication, with the exception of the observed de-escalating  
4  
5 effect, in the Continuation group, of second-generation antipsychotics, which possess  
6  
7 powerful analgesic properties<sup>29 30</sup>. This is accordance with the literature, given the fact that  
8  
9 psychiatric conditions can enhance symptom severity in somatic patients<sup>28</sup>, which  
10  
11 sometimes may impact even more that the somatic condition itself<sup>31</sup>.  
12  
13

14  
15  
16 However, the question remains to what degree escalation of analgesic treatment and  
17  
18 its association with psychotropic medication reflects therapeutic efforts to remedy pain,  
19  
20 treatment of psychiatric comorbidity, or a cause of psychopathology. In the Starter and the  
21  
22 Continuation group of chronic analgesic treatment, escalation of analgesics was consistently  
23  
24 and positively associated with the use of TCA. This prescription habit may reflect routine  
25  
26 paradigms in the pharmacological treatment of pain syndromes<sup>10 23 32-34</sup>. However, given the  
27  
28 evidence regarding TCA's efficacy in pain conditions, negative rather than positive  
29  
30 associations with escalation of analgesics should have been expected. More likely, since the  
31  
32 association with TCAs was as strong as the association of sedatives with analgesic escalation,  
33  
34 it may be a reflection of affective or addictive comorbidity in persistent pain, for instance in  
35  
36 vulnerable cases of opiate-induced sensitization, tolerance and hyperalgesia<sup>35-41</sup>. Moreover,  
37  
38 escalation of analgesic treatment in starters of chronic analgesic treatment was even more  
39  
40 strongly associated with the use of TCA, sedatives, SNRI and antipsychotics, if prescribed  
41  
42 *after* the start of analgesics. One explanation for stronger associations of escalation in  
43  
44 analgesics with the use of psychotropic medication if started *after* initiation of analgesic  
45  
46 treatment may be that psychotropic medication was prescribed in the event of psychiatric  
47  
48 comorbidity occurring later in course of the syndrome occasioning the pain. This may be  
49  
50 considered likely, since many patients diagnosed with pain syndromes are suffering from  
51  
52 mood or anxiety disorders and functional somatic complaints<sup>37 42</sup>. Furthermore, under-  
53  
54  
55  
56  
57  
58  
59  
60

1  
2  
3 detection of psychiatric comorbidity may occur early in the course of comorbid psychiatric  
4  
5 conditions<sup>25 27 28</sup>.

6  
7  
8 On the other hand, the strong association of psychotropic medication with escalation  
9  
10 of analgesics *after* start of analgesic treatment may reflect a direct effect of the  
11  
12 psychopharmacological intervention itself. Recent findings suggest that not opiates but  
13  
14 serotonin may be involved in the development of persisting pain<sup>43 44</sup>. This may also explain  
15  
16 why antidepressants show stronger positive associations with escalation of analgesic  
17  
18 treatment if started later, after the initial prescription of analgesics.  
19  
20  
21

22  
23 According to the literature<sup>23 32-35 45</sup>, negative associations of particularly  
24  
25 antidepressants with escalation of chronic analgesic treatment might have been expected.  
26  
27 As mentioned earlier, under-detection of psychiatric conditions early in the course of  
28  
29 analgesic treatment or effects of the pharmacological intervention itself may explain that  
30  
31 this is not the case<sup>24 27 37 46</sup>. Nevertheless, there are negative associations with escalation of  
32  
33 chronic analgesic treatment in, for example, pharmacological migraine treatment. Moreover,  
34  
35 the use of antipsychotics was negatively associated with analgesic escalation for the Starter  
36  
37 group if prescribed after start of analgesic treatment. In the Continuation group, de-  
38  
39 escalation was specifically associated with the use of atypical antipsychotics. This outcome is  
40  
41 interesting and deserves further investigation, given that limited evidence for the efficacy of  
42  
43 antipsychotics in pain conditions already exists<sup>29 30</sup>.  
44  
45  
46  
47  
48  
49

50 The results of the current study should be seen in the light of several limitations. The  
51  
52 use of routine data rather than a targeted data collection could have caused more random  
53  
54 error resulting in type II error. Unidentified confounding may have played a role, as  
55  
56 randomization was not possible and pre-post designs are sensitive to effects of unmeasured  
57  
58  
59  
60

1  
2  
3 changes affecting outcome measures over time. Another limitation is the lack of outcomes  
4  
5 other than urbanization, psychotropic medication or somatic co-medication. For instance,  
6  
7 there were no estimates regarding care consumption or illness-related sick leave. Changes in  
8  
9 patient-related outcomes like illness severity, global functioning, quality of life and  
10  
11 treatment satisfaction should also form part of prospective evaluations. Furthermore, this  
12  
13 study only collected data over a twelve-month period. Affect and pain monitoring deserves  
14  
15 longer evaluation. Finally, due to the study design, associations do not allow for causal  
16  
17 inference. Finally, due to the study design, associations do not allow for causal  
18  
19  
20  
21  
22

#### 23 WHAT IS ALREADY KNOWN ON THIS TOPIC

24  
25  
26  
27 Numerous observational studies have observed higher rates of poor mental health in  
28  
29 urban and deprived neighbourhood environments.  
30  
31

32  
33  
34 Pain syndromes and psychiatric disorders show high levels of interdependency, and  
35  
36 psychiatric conditions enhance severity of somatic symptoms.  
37  
38

#### 39 WHAT THIS STUDY ADDS

40  
41  
42  
43 Escalation of chronic analgesic treatment in persistent pain is associated with urban  
44  
45 environments and deprived neighbourhoods, and occurs in a context of increased  
46  
47 levels of psychotropic medications, suggesting persistent pain outcomes are  
48  
49 associated with area influences affecting mental health.  
50  
51  
52  
53

54  
55  
56 *Contributors:* CL, SB and JvO were principal investigators of the study. SB analysed the data  
57  
58 in collaboration with CL, JvO, and JS. CL and JvO drafted the paper. All authors contributed to  
59  
60

1  
2  
3 subsequent drafts of the paper, including the final version. JvO is guarantor.  
4  
5

6  
7 *External funding:* Eli Lilly provided funding to IMS Health for data analysis. External funding  
8  
9 did not support any other aspect of the study. All authors contributed independently from  
10  
11 funders to this study; and all authors had full access to and can take responsibility for the  
12  
13 data and analyses.  
14

15  
16  
17 *Competing interests:* All authors have completed the Unified Competing Interest form at  
18  
19 [www.icmje.org/coi\\_disclosure.pdf](http://www.icmje.org/coi_disclosure.pdf) (available on request from the corresponding author) and  
20  
21 declare: no support from any organisation for the submitted work, with the exception of  
22  
23 above-mentioned funding to IMS Health for data analysis; no financial relationships with any  
24  
25 organisation that might have an interest in the submitted work; and no other relationships  
26  
27 or activities that could appear to have influenced the submitted work.  
28  
29

30  
31  
32 *License for publication:* All authors grant an exclusive license (or non exclusive for  
33  
34 government employees) on a worldwide basis to the BMJ Publishing Group LTD and its  
35  
36 licensees, to permit this article (if accepted) to be published in BMJ editions and any other  
37  
38 BMJPG products and to exploit all subsidiary rights, as set out on:  
39  
40 <http://resources.bmj.com/bmj/authors/checklists-forms/license-for-publication>.  
41  
42  
43  
44  
45  
46  
47  
48  
49  
50  
51  
52  
53  
54  
55  
56  
57  
58  
59  
60

## References

1. Lofors J, Sundquist K. Low-linking social capital as a predictor of mental disorders: a cohort study of 4.5 million Swedes. *Social science & medicine (1982)* 2007;64(1):21-34.
2. Thomas H, Weaver N, Patterson J, et al. Mental health and quality of residential environment. *Br J Psychiatry* 2007;191:500-5.
3. Ivory VC CS, Blakely T, Dew K. When does neighbourhood matter? Multilevel relationships between neighbourhood social fragmentation and mental health. *Social science & medicine (1982)* 2011;72:1993-2002.
4. Lederbogen F KP, Haddad L, Streit F, et al. City living and urban upbringing affect neural stress processing in humans. *Nature* 2011;474(7352):498-501.
5. Hubbard Cs LJ, Bueller J, Stains J, et al. Corticotropin-releasing factor receptor 1 antagonist alters regional activation and effective connectivity in an emotional-arousal circuit during expectation of abdominal pain. *J Neurosci* 2011;31(35):12491-500.
6. Murrough JW Huang Y, Hu J, et al. Reduced amygdala serotonin transporter binding in posttraumatic stress disorder. *Biol Psychiatry* 2011(Aug 17):[Epub ahead of print].
7. Smith HS HR, Clauw D. Fibromyalgia: an afferent processing disorder leading to a complex pain generalized syndrome. *Pain Physician* 2011;14(2):E217-45.
8. Price DD CJ, Zhou Q, Verne GN, et al. Widespread hyperalgesia in irritable bowel syndrome is dynamically maintained by tonic visceral impulse input and placebo/nocebo factors: evidence from human psychophysics, animal models and neuroimaging. *Neuroimage* 2009;47(3):995-1001.
9. Wise TN, Fishbain DA, Holder-Perkins V. Painful physical symptoms in depression: a clinical challenge. *Pain medicine (Malden, Mass 2007)*;8 Suppl 2:S75-82.
10. Goldenberg DL. Pain/Depression dyad: a key to a better understanding and treatment of functional somatic syndromes. *The American journal of medicine*;123(8):675-82.
11. Crump C, Sundquist K, Sundquist J, et al. Neighborhood deprivation and psychiatric medication prescription: a Swedish national multilevel study. *Ann Epidemiol*;21(4):231-7.
12. Netelenbos JC, Geusens PP, Ypma G, et al. Adherence and profile of non-persistence in patients treated for osteoporosis--a large-scale, long-term retrospective study in The Netherlands. *Osteoporos Int*;22(5):1537-46.
13. Buurma H, Bouvy ML, De Smet PA, et al. Prevalence and determinants of pharmacy shopping behaviour. *Journal of clinical pharmacy and therapeutics* 2008;33(1):17-23.
14. McKenzie K, Samele C, Van Horn E, et al. Comparison of the outcome and treatment of psychosis in people of Caribbean origin living in the UK and British Whites. Report from the UK700 trial. *Br J Psychiatry* 2001;178:160-5.
15. Central Bureau of Statistics. Bevolking der gemeenten van Nederland. *The Hague, The Netherlands: CBS Publications* 1993.
16. Wiegers TA DW. Herijking stedelijke achterstandsgebieden. *Utrecht, The Netherlands: NIVEL publications* 2008.
17. Nza, tariefbeschikking 5000-1900-09-3, 30 juni 2009. <http://www.naz.nl/>.
18. <http://www.sas.com/>.
19. Drukker M, van Os J. Mediators of neighbourhood socioeconomic deprivation and quality of life. *Social psychiatry and psychiatric epidemiology* 2003;38(12):698-706.

- 1
- 2
- 3 20. Skapinakis P, Weich S, Lewis G, et al. Socio-economic position and common mental
- 4 disorders. Longitudinal study in the general population in the UK. *Br J Psychiatry*
- 5 2006;189:109-17.
- 6
- 7 21. van Os J, Kenis G, Rutten BP. The environment and schizophrenia. *Nature*;468(7321):203-
- 8 12.
- 9
- 10 22. Hotopf M, Mayou R, Wadsworth M, et al. Temporal relationships between physical
- 11 symptoms and psychiatric disorder. Results from a national birth cohort. *Br J*
- 12 *Psychiatry* 1998;173:255-61.
- 13
- 14 23. Kroenke K, Jackson JL, Chamberlin J. Depressive and anxiety disorders in patients
- 15 presenting with physical complaints: clinical predictors and outcome. *The American*
- 16 *journal of medicine* 1997;103(5):339-47.
- 17
- 18 24. Barsky AJ, Orav EJ, Bates DW. Somatization increases medical utilization and costs
- 19 independent of psychiatric and medical comorbidity. *Archives of general psychiatry*
- 20 2005;62(8):903-10.
- 21
- 22 25. Fink P, Hansen MS, Oxhøj ML. The prevalence of somatoform disorders among internal
- 23 medical inpatients. *Journal of psychosomatic research* 2004;56(4):413-8.
- 24
- 25 26. Levy RL, Olden KW, Naliboff BD, et al. Psychosocial aspects of the functional
- 26 gastrointestinal disorders. *Gastroenterology* 2006;130(5):1447-58.
- 27
- 28 27. Leue C, Driessen G, Strik JJ, et al. Managing complex patients on a medical psychiatric
- 29 unit: an observational study of university hospital costs associated with medical
- 30 service use, length of stay, and psychiatric intervention. *Journal of psychosomatic*
- 31 *research*;68(3):295-302.
- 32
- 33 28. Meyer T, Klemme H, Herrmann C. Depression but not anxiety is a significant predictor of
- 34 physicians' assessments of medical status in physically ill patients. *Psychotherapy and*
- 35 *psychosomatics* 2000;69(3):147-54.
- 36
- 37 29. Freudenfeld RN, Murray M, Fuchs PN, et al. Decreased pain and improved quality of life
- 38 in fibromyalgia patients treated with olanzapine, an atypical neuroleptic. *Pain Pract*
- 39 2006;6(2):112-8.
- 40
- 41 30. Seidel S, Aigner M, Ossege M, et al. Antipsychotics for acute and chronic pain in adults.
- 42 *Cochrane database of systematic reviews (Online)* 2008(4):CD004844.
- 43
- 44 31. Kim KW, Han JW, Cho HJ, et al. Association between comorbid depression and
- 45 osteoarthritis symptom severity in patients with knee osteoarthritis. *J Bone Joint Surg*
- 46 *Am* 2011;93(6):556-63.
- 47
- 48 32. Hauser W, Bernardy K, Uceyler N, et al. Treatment of fibromyalgia syndrome with
- 49 antidepressants: a meta-analysis. *JAMA* 2009;301(2):198-209.
- 50
- 51 33. Ford AC, Talley NJ, Schoenfeld PS, et al. Efficacy of antidepressants and psychological
- 52 therapies in irritable bowel syndrome: systematic review and meta-analysis. *Gut*
- 53 2009;58(3):367-78.
- 54
- 55 34. Saarto T, Wiffen PJ. Antidepressants for neuropathic pain. *Cochrane database of*
- 56 *systematic reviews (Online)* 2007(4):CD005454.
- 57
- 58 35. Krebs EE, Gaynes BN, Gartlehner G, et al. Treating the physical symptoms of depression
- 59 with second-generation antidepressants: a systematic review and metaanalysis.
- 60 *Psychosomatics* 2008;49(3):191-8.
36. Arnold LM, Hudson JI, Wang F, et al. Comparisons of the efficacy and safety of duloxetine
- for the treatment of fibromyalgia in patients with versus without major depressive
- disorder. *Clin J Pain* 2009;25(6):461-8.

- 1  
2  
3 37. Arnold LM, Hudson JI, Keck PE, et al. Comorbidity of fibromyalgia and psychiatric  
4 disorders. *J Clin Psychiatry* 2006;67(8):1219-25.  
5 38. Bekhit MH. Opioid-induced hyperalgesia and tolerance. *Am J Ther* 2010;17(5):498-510.  
6 39. Berton O, McClung CA, Dileone RJ, Krishnan V, Renthal W, Russo SJ, et al. Essential role of  
7 BDNF in the mesolimbic dopamine pathway in social defeat stress. *Science*  
8 2006;311(5762):864-8.  
9 40. Upadhyay J, Maleki N, Potter J, et al. Alterations in brain structure and functional  
10 connectivity in prescription opioid-dependent patients. *Brain* 2010;133(Pt 7):2098-  
11 114.  
12 41. Angst MS, Clark JD. Opioid-induced hyperalgesia: a qualitative systematic review.  
13 *Anesthesiology* 2006;104(3):570-87.  
14 42. Aaron LA, Buchwald D. Chronic diffuse musculoskeletal pain, fibromyalgia and co-morbid  
15 unexplained clinical conditions. *Best Pract Res Clin Rheumatol* 2003;17(4):563-74.  
16 43. Chu LF, Dairmont J, Zamora AK, et al. The endogenous opioid system is not involved in  
17 modulation of opioid-induced hyperalgesia. *J Pain* 2011;12(1):108-15.  
18 44. Wei F, Dubner R, Zou S, et al. Molecular depletion of descending serotonin unmasks its  
19 novel facilitatory role in the development of persistent pain. *J Neurosci*  
20 2010;30(25):8624-36.  
21 45. Rayner L, Price A, Evans A, et al. Antidepressants for depression in physically ill people.  
22 *Cochrane database of systematic reviews (Online)* 2010(3):CD007503.  
23 46. Artigas F, Bel N, Casanovas JM, Romero L. Adaptive changes of the serotonergic system  
24 after antidepressant treatments. *Adv Exp Med Biol* 1996;398:51-9.  
25  
26  
27  
28  
29  
30  
31  
32  
33  
34  
35  
36  
37  
38  
39  
40  
41  
42  
43  
44  
45  
46  
47  
48  
49  
50  
51  
52  
53  
54  
55  
56  
57  
58  
59  
60

1  
2  
3  
4  
5  
6  
7  
8  
9  
10  
11  
12  
13  
14  
15  
16  
17  
18  
19  
20  
21  
22  
23  
24  
25  
26  
27  
28  
29  
30  
31  
32  
33  
34  
35  
36  
37  
38  
39  
40  
41  
42  
43  
44  
45  
46  
47  
48  
49  
50  
51  
52  
53  
54  
55  
56  
57  
58  
59  
60

|  |         |          |
|--|---------|----------|
|  | Starter | Continu- |
|--|---------|----------|

For peer review only

**Table 1: Baseline characteristics of the patient population with chronic analgesic treatment**



|             |                                        | group    |                         |            | ation group |            |            |
|-------------|----------------------------------------|----------|-------------------------|------------|-------------|------------|------------|
|             |                                        | Deprived | Urbanicity <sup>1</sup> | Urbanicity | Deprived    | Urbanicity | Urbanicity |
|             |                                        | nb.hoods | 1                       | 2-5        | nb. hoods   | 1          | 2-5        |
| Patients    | (Absolute)                             | 12,485   | 45,458                  | 120,916    | 21,799      | 78,358     | 204,672    |
| Change in   | Analgesics <sup>2</sup>                |          |                         |            |             |            |            |
|             | De-escalation                          | 13.3%    | 12.1%                   | 10.4%      | 13.2%       | 12.5%      | 11.2%      |
|             | Neutral                                | 70.1%    | 71.6%                   | 74.5%      | 70.0%       | 71.4%      | 73.7%      |
|             | Escalation                             | 16.5%    | 16.3%                   | 15.1%      | 16.8%       | 16.1%      | 15.1%      |
| Gender      | Male                                   | 39.8%    | 39.3%                   | 40.3%      | 36.7%       | 35.2%      | 34.6%      |
|             | Female                                 | 60.2%    | 60.7%                   | 59.7%      | 63.3%       | 64.8%      | 65.4%      |
| Age (years) | 15-25                                  | 6.3%     | 6.1%                    | 6.5%       | 1.8%        | 1.6%       | 1.8%       |
|             | 26-40                                  | 23.8%    | 19.2%                   | 16.3%      | 14.0%       | 10.8%      | 9.7%       |
|             | 41-65                                  | 50.0%    | 49.6%                   | 50.9%      | 56.9%       | 53.4%      | 51.8%      |
|             | 65-85                                  | 19.8%    | 25.2%                   | 26.2%      | 27.3%       | 34.2%      | 36.7%      |
| First       | Analgesics                             |          |                         |            |             |            |            |
|             | Level 1                                | 3.2%     | 3.9%                    | 4.0%       | 3.0%        | 3.8%       | 4.1%       |
|             | Level 2                                | 64.8%    | 66.6%                   | 72.6%      | 47.8%       | 47.1%      | 53.6%      |
|             | Level 3                                | 2.2%     | 2.5%                    | 2.6%       | 6.4%        | 8.1%       | 8.9%       |
|             | Level 4                                | 27.4%    | 24.2%                   | 18.3%      | 36.1%       | 33.9%      | 27.6%      |
|             | Level 5                                | 2.4%     | 2.9%                    | 2.6%       | 6.8%        | 7.2%       | 5.9%       |
|             | level 4/5                              | 29.8%    | 27.0%                   | 20.8%      | 42.8%       | 41.1%      | 33.5%      |
| Last        | Analgesics                             |          |                         |            |             |            |            |
|             | Level 1                                | 3.4%     | 3.9%                    | 4.0%       | 3.4%        | 4.1%       | 4.3%       |
|             | Level 2                                | 61.9%    | 63.0%                   | 68.4%      | 44.5%       | 44.1%      | 50.1%      |
|             | Level 3                                | 3.0%     | 3.3%                    | 3.4%       | 7.0%        | 8.4%       | 9.2%       |
|             | Level 4                                | 27.6%    | 24.6%                   | 18.9%      | 36.8%       | 34.5%      | 28.4%      |
|             | Level 5                                | 4.1%     | 5.2%                    | 5.3%       | 8.3%        | 9.0%       | 7.9%       |
|             | Level 4/5                              | 31.7%    | 29.8%                   | 24.2%      | 45.1%       | 43.4%      | 36.3%      |
| Concomitant | Medication <sup>3</sup>                |          |                         |            |             |            |            |
|             | Any concomitant drug                   | 78.8%    | 79.0%                   | 77.3%      | 89.3%       | 89.6%      | 88.0%      |
|             | Migraine medication                    | 3.9%     | 3.6%                    | 3.8%       | 5.9%        | 5.2%       | 5.1%       |
|             | Any psychotropic medication            | 35.1%    | 36.6%                   | 34.8%      | 51.6%       | 53.2%      | 50.2%      |
|             | TCA                                    | 5.2%     | 5.0%                    | 5.0%       | 9.5%        | 9.4%       | 9.6%       |
|             | Other AD                               | 2.4%     | 2.0%                    | 1.6%       | 4.0%        | 3.3%       | 2.7%       |
|             | Antipsychotics total                   | 4.1%     | 3.9%                    | 3.1%       | 6.7%        | 6.1%       | 4.9%       |
|             | Antipsychotics atypical                | 2.4%     | 2.2%                    | 1.5%       | 4.1%        | 3.5%       | 2.5%       |
|             | Antipsychotics classic                 | 2.0%     | 2.1%                    | 1.8%       | 3.2%        | 3.2%       | 2.7%       |
|             | Burpropion                             | 0.1%     | 0.1%                    | 0.1%       | 0.2%        | 0.2%       | 0.1%       |
|             | MAO inhibitors                         | 0.0%     | 0.0%                    | 0.1%       | 0.1%        | 0.1%       | 0.1%       |
|             | Mood stabilizers                       | 0.2%     | 0.3%                    | 0.2%       | 0.3%        | 0.4%       | 0.4%       |
|             | Sedatives                              | 27.0%    | 29.0%                   | 27.4%      | 41.5%       | 43.4%      | 40.6%      |
|             | SNRI                                   | 2.6%     | 2.4%                    | 2.2%       | 4.5%        | 4.0%       | 3.5%       |
|             | SSRI                                   | 7.5%     | 7.0%                    | 6.4%       | 10.3%       | 10.0%      | 9.0%       |
|             | Psycho-stimulants                      | 0.4%     | 0.5%                    | 0.5%       | 0.3%        | 0.5%       | 0.4%       |
|             | Any somatic medication                 | 72.3%    | 72.6%                   | 71.0%      | 83.0%       | 82.9%      | 81.7%      |
|             | Cardiovascular medication <sup>4</sup> | 30.9%    | 31.4%                   | 30.8%      | 35.2%       | 34.9%      | 34.9%      |
|             | Other Somatic medication <sup>5</sup>  | 65.2%    | 65.5%                   | 64.0%      | 76.9%       | 76.7%      | 75.4%      |

Legend: Patient characteristics are presented as percentages (e.g. age, gender, level of analgesic treatment, change in analgesic treatment (e.g. escalation, de-escalation, and neutral development of prescriptions), and concomitant medication). Absolute patient numbers are presented for the Starter and the Continuation group of chronic analgesic treatment concerning level of urbanicity and for neighbourhood deprivation.

(1) Urbanicity = Urbanization (level 1 = highest level of urbanization; level 5 = rural environment)

- (2) Change in pain medication from first to last prescription (neutral = no change in level of potency, escalation = change to a higher level of analgesic potency, de-escalation = change to lower analgesic potency)
- (3) Concomitant drug use, observed during a period of 12 month
- (4) Cardiovascular medication: beta-blocker, calcium antagonist, ACE inhibitor, angiotensine II inhibitor
- (5) Gastro-intestinal medication: anti-diabetics, steroid-antiphogistics, respiratory medication

For peer review only



**Observational evidence that urbanisation and neighbourhood deprivation are associated with escalation in pharmacological pain treatment - a longitudinal population-based study in the Netherlands**

|                                 |                                                                                                                                                                                                                                                                                                                                                                                                                                                                                                                                  |
|---------------------------------|----------------------------------------------------------------------------------------------------------------------------------------------------------------------------------------------------------------------------------------------------------------------------------------------------------------------------------------------------------------------------------------------------------------------------------------------------------------------------------------------------------------------------------|
| Journal:                        | <i>BMJ Open</i>                                                                                                                                                                                                                                                                                                                                                                                                                                                                                                                  |
| Manuscript ID:                  | bmjopen-2011-000731.R1                                                                                                                                                                                                                                                                                                                                                                                                                                                                                                           |
| Article Type:                   | Research                                                                                                                                                                                                                                                                                                                                                                                                                                                                                                                         |
| Date Submitted by the Author:   | 03-May-2012                                                                                                                                                                                                                                                                                                                                                                                                                                                                                                                      |
| Complete List of Authors:       | Leue, Carsten; Maastricht University Medical Centre, Department of Psychiatry and Medical Psychology<br>Buijs, Servaas; IMS Helath,<br>Strik, Jacqueline; Maastricht University Medical Centre, Psychiatry and Medical Psychology<br>Lousberg, Richel; Maastricht University Medical Centre, Psychiatry and Medical Psychology<br>Smit, Jasper; IMS Health,<br>van Kleef, Maarten; Maastricht University Medical Centre, Anaesthesiology<br>van Os, Jim; Maastricht University Medical Centre, Psychiatry and Medical Psychology |
| <b>Primary Subject Heading</b>: | General practice / Family practice                                                                                                                                                                                                                                                                                                                                                                                                                                                                                               |
| Secondary Subject Heading:      | Mental health, Health services research, Medical management, Anaesthesia                                                                                                                                                                                                                                                                                                                                                                                                                                                         |
| Keywords:                       | Pain management < ANAESTHETICS, MENTAL HEALTH, PAIN MANAGEMENT, PRIMARY CARE, Substance misuse < PSYCHIATRY                                                                                                                                                                                                                                                                                                                                                                                                                      |
|                                 |                                                                                                                                                                                                                                                                                                                                                                                                                                                                                                                                  |

SCHOLARONE™  
Manuscripts

|                              | Item No | Recommendation                                                                                                                                                                                                                                                                                                                                                                                                                                                                                                                |
|------------------------------|---------|-------------------------------------------------------------------------------------------------------------------------------------------------------------------------------------------------------------------------------------------------------------------------------------------------------------------------------------------------------------------------------------------------------------------------------------------------------------------------------------------------------------------------------|
| <b>Title and abstract</b>    | 1       | (a) Indicate the study's design with a commonly used term in the title or the abstract DONE                                                                                                                                                                                                                                                                                                                                                                                                                                   |
|                              |         | (b) Provide in the abstract an informative and balanced summary of what was done and what was found DONE                                                                                                                                                                                                                                                                                                                                                                                                                      |
| <b>Introduction</b>          |         |                                                                                                                                                                                                                                                                                                                                                                                                                                                                                                                               |
| Background/rationale         | 2       | Explain the scientific background and rationale for the investigation being reported DONE                                                                                                                                                                                                                                                                                                                                                                                                                                     |
| Objectives                   | 3       | State specific objectives, including any prespecified hypotheses DONE                                                                                                                                                                                                                                                                                                                                                                                                                                                         |
| <b>Methods</b>               |         |                                                                                                                                                                                                                                                                                                                                                                                                                                                                                                                               |
| Study design                 | 4       | Present key elements of study design early in the paper DONE                                                                                                                                                                                                                                                                                                                                                                                                                                                                  |
| Setting                      | 5       | Describe the setting, locations, and relevant dates, including periods of recruitment, exposure, follow-up, and data collection DONE                                                                                                                                                                                                                                                                                                                                                                                          |
| Participants                 | 6       | (a) <i>Cohort study</i> —Give the eligibility criteria, and the sources and methods of selection of participants. Describe methods of follow-up DONE<br><i>Case-control study</i> —Give the eligibility criteria, and the sources and methods of case ascertainment and control selection. Give the rationale for the choice of cases and controls<br><i>Cross-sectional study</i> —Give the eligibility criteria, and the sources and methods of selection of participants                                                   |
|                              |         | (b) <i>Cohort study</i> —For matched studies, give matching criteria and number of exposed and unexposed<br><i>Case-control study</i> —For matched studies, give matching criteria and the number of controls per case                                                                                                                                                                                                                                                                                                        |
| Variables                    | 7       | Clearly define all outcomes, exposures, predictors, potential confounders, and effect modifiers. Give diagnostic criteria, if applicable DONE                                                                                                                                                                                                                                                                                                                                                                                 |
| Data sources/<br>measurement | 8*      | For each variable of interest, give sources of data and details of methods of assessment (measurement). Describe comparability of assessment methods if there is more than one group DONE                                                                                                                                                                                                                                                                                                                                     |
| Bias                         | 9       | Describe any efforts to address potential sources of bias DONE                                                                                                                                                                                                                                                                                                                                                                                                                                                                |
| Study size                   | 10      | Explain how the study size was arrived at DONE                                                                                                                                                                                                                                                                                                                                                                                                                                                                                |
| Quantitative variables       | 11      | Explain how quantitative variables were handled in the analyses. If applicable, describe which groupings were chosen and why DONE                                                                                                                                                                                                                                                                                                                                                                                             |
| Statistical methods          | 12      | (a) Describe all statistical methods, including those used to control for confounding DONE<br>(b) Describe any methods used to examine subgroups and interactions<br>(c) Explain how missing data were addressed<br>(d) <i>Cohort study</i> —If applicable, explain how loss to follow-up was addressed<br><i>Case-control study</i> —If applicable, explain how matching of cases and controls was addressed<br><i>Cross-sectional study</i> —If applicable, describe analytical methods taking account of sampling strategy |
|                              |         | (e) Describe any sensitivity analyses                                                                                                                                                                                                                                                                                                                                                                                                                                                                                         |

**Results**

|                  |     |                                                                                                                                                                                                                                                                                                                                                                                                                         |
|------------------|-----|-------------------------------------------------------------------------------------------------------------------------------------------------------------------------------------------------------------------------------------------------------------------------------------------------------------------------------------------------------------------------------------------------------------------------|
| Participants     | 13* | (a) Report numbers of individuals at each stage of study—eg numbers potentially eligible, examined for eligibility, confirmed eligible, included in the study, completing follow-up, and analysed DONE<br>(b) Give reasons for non-participation at each stage<br>(c) Consider use of a flow diagram DONE                                                                                                               |
| Descriptive data | 14* | (a) Give characteristics of study participants (eg demographic, clinical, social) and information on exposures and potential confounders DONE<br>(b) Indicate number of participants with missing data for each variable of interest<br>(c) <i>Cohort study</i> —Summarise follow-up time (eg, average and total amount) DONE                                                                                           |
| Outcome data     | 15* | <i>Cohort study</i> —Report numbers of outcome events or summary measures over time DONE<br><i>Case-control study</i> —Report numbers in each exposure category, or summary measures of exposure<br><i>Cross-sectional study</i> —Report numbers of outcome events or summary measures                                                                                                                                  |
| Main results     | 16  | (a) Give unadjusted estimates and, if applicable, confounder-adjusted estimates and their precision (eg, 95% confidence interval). Make clear which confounders were adjusted for and why they were included DONE<br>(b) Report category boundaries when continuous variables were categorized DONE<br>(c) If relevant, consider translating estimates of relative risk into absolute risk for a meaningful time period |
| Other analyses   | 17  | Report other analyses done—eg analyses of subgroups and interactions, and sensitivity analyses                                                                                                                                                                                                                                                                                                                          |

**Discussion**

|                  |    |                                                                                                                                                                                 |
|------------------|----|---------------------------------------------------------------------------------------------------------------------------------------------------------------------------------|
| Key results      | 18 | Summarise key results with reference to study objectives DONE                                                                                                                   |
| Limitations      | 19 | Discuss limitations of the study, taking into account sources of potential bias or imprecision. Discuss both direction and magnitude of any potential bias DONE                 |
| Interpretation   | 20 | Give a cautious overall interpretation of results considering objectives, limitations, multiplicity of analyses, results from similar studies, and other relevant evidence DONE |
| Generalisability | 21 | Discuss the generalisability (external validity) of the study results DONE                                                                                                      |

**Other information**

|         |    |                                                                                                                                                                    |
|---------|----|--------------------------------------------------------------------------------------------------------------------------------------------------------------------|
| Funding | 22 | Give the source of funding and the role of the funders for the present study and, if applicable, for the original study on which the present article is based DONE |
|---------|----|--------------------------------------------------------------------------------------------------------------------------------------------------------------------|

1  
2  
3  
4  
5  
6  
7  
8  
9  
10  
11  
12  
13  
14  
15  
16  
17  
18  
19  
20  
21  
22  
23  
24  
25  
26  
27  
28  
29  
30  
31  
32  
33  
34  
35  
36  
37  
38  
39  
40  
41  
42  
43  
44  
45  
46  
47  
48  
49  
50  
51  
52  
53  
54  
55  
56  
57  
58  
59  
60

|                            |  | Time (months)               |   |   |   |   |   |                    |             |   |    |    |         |         |
|----------------------------|--|-----------------------------|---|---|---|---|---|--------------------|-------------|---|----|----|---------|---------|
|                            |  | period prior to observation |   |   |   |   |   | observation period |             |   |    |    |         |         |
|                            |  | 1                           | 2 | 3 | 4 | 5 | 6 | 7                  | 8           | 9 | 10 | 11 | 12      |         |
| <b>starting patients</b>   |  | no Rx for analgesics        |   |   |   |   |   | first Rx           | Rx - Rx ... |   |    |    |         | last Rx |
| <b>continuing patients</b> |  | first Rx                    |   |   |   |   |   | Rx - Rx - Rx ...   |             |   |    |    | last Rx |         |

For peer review only

1  
2  
3  
4  
5  
6  
7  
8  
9  
10  
11  
12  
13  
14  
15  
16  
17  
18  
19  
20  
21  
22  
23  
24  
25  
26  
27  
28  
29  
30  
31  
32  
33  
34  
35  
36  
37  
38  
39  
40  
41  
42  
43  
44  
45  
46  
47  
48  
49  
50  
51  
52  
53  
54  
55  
56  
57  
58  
59  
60

For peer review only

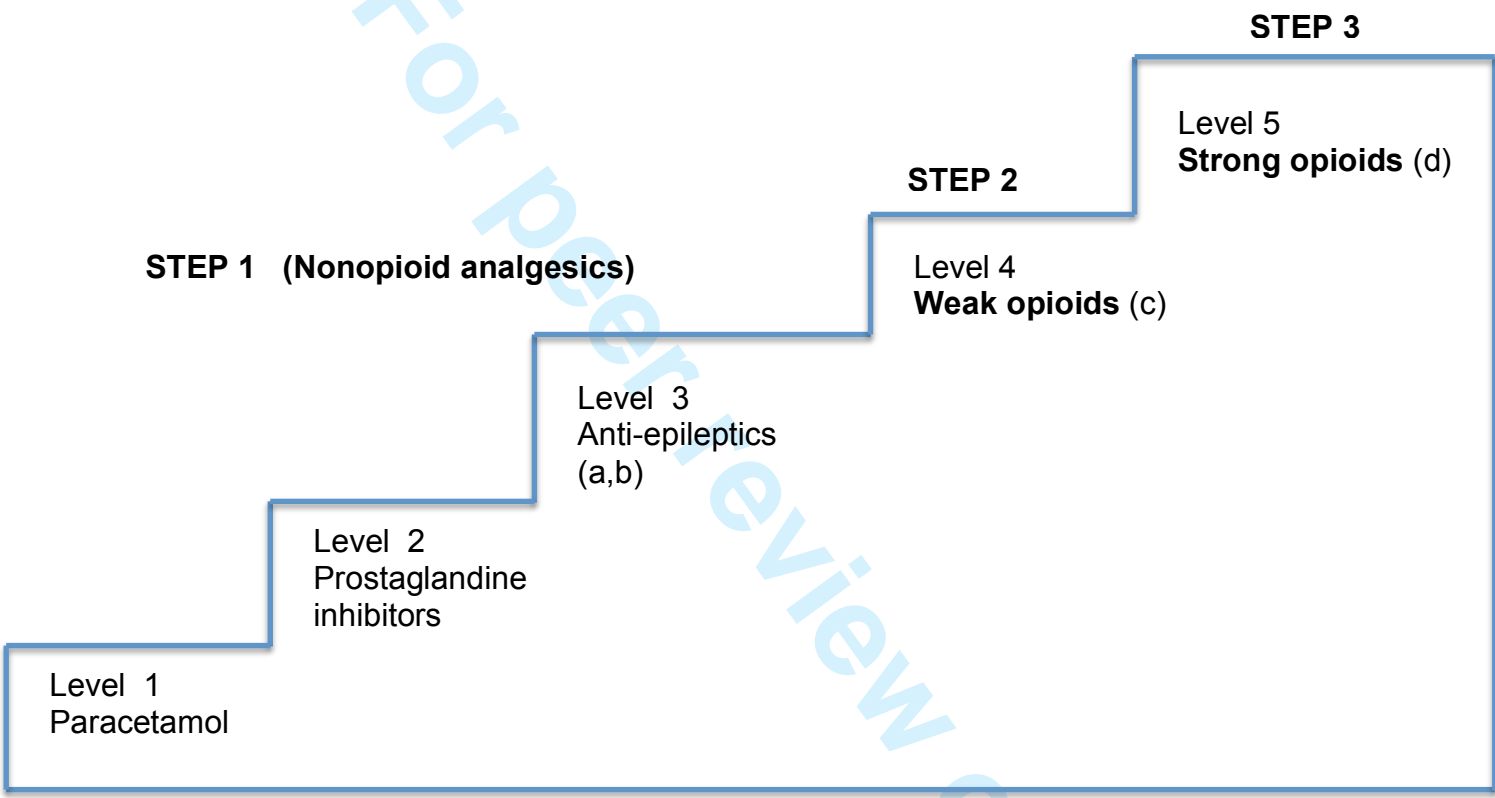

## Original article

**Observational evidence that urbanisation and neighbourhood deprivation are associated with escalation in pharmacological pain treatment - a longitudinal population-based study in the Netherlands**

Carsten Leue, consultant<sup>\*1</sup>, Servaas Buijs, statistician<sup>2</sup>, Jacqueline Strik, consultant<sup>1</sup>, Richel Lousberg, lecturer<sup>1</sup>, Jasper Smit, statistician<sup>2</sup>, Maarten van Kleef, professor<sup>3</sup>, Jim van Os, professor<sup>1,4</sup>

<sup>1</sup>Department of Psychiatry and Psychology, South Limburg Mental Health Research and Teaching Network, EURON, Maastricht University Medical Centre, Maastricht, The Netherlands.

<sup>2</sup>IMS Health BV, Capelle aan den IJssel, The Netherlands.

<sup>3</sup>Department of Anaesthesiology, Maastricht University Medical Centre, Maastricht, The Netherlands.

<sup>4</sup>King's College London, King's Health Partners, Department of Psychosis Studies, Institute of Psychiatry, London, United Kingdom.

\*Correspondence:

C. Leue, Department of Psychiatry and Medical Psychology, Maastricht University Medical Centre, PO BOX 616 (DRT 10), NL 6200 MD Maastricht, The Netherlands. Tel: ++31-43-3877444. Fax: ++31-43-3875444. E-mail: [c.leue@mumc.nl](mailto:c.leue@mumc.nl)



**Abstract:**

*Objective:* To examine whether urbanisation and neighbourhood deprivation [are associated with analgesic escalation in](#) chronic pharmacological pain treatment, [and whether escalation is associated with](#) prescription of psychotropic medications.

*Design:* Longitudinal analysis of a population-based routine [dispensing](#) database in the Netherlands.

*Setting:* Representative sample of pharmacies, covering 73% of the Dutch nationwide medication consumption in [the](#) primary care and [hospital](#) outpatient [settings](#).

*Participants:* 449,410 patients aged 15-85 years were included, of whom 166,374 were in the *Starter group* and 283,036 in the *Continuation group* of chronic analgesic treatment.

*Main outcome measure:* Escalation of analgesics (i.e. change to a higher level of analgesic potency, classified in five levels) in association with urbanisation ([five levels](#)) and dichotomous neighbourhood deprivation, [analysed](#) over a six-month observation period.

*Methods:* [Ordered logistic multivariate model evaluating analgesic treatment.](#)

*Results:* In both *Starter* and *Continuation* groups, escalation was positively associated with urbanisation in a [dose](#)-response fashion (Starter group: OR (urbanisation level 1 compared to level 5): 1.24; 95% CI 1.18 to 1.30; Continuation group: OR 1.19; 95% CI 1.14 to 1.23). A weak association was apparent with neighbourhood deprivation (Starter group: OR 1.06; 95% CI 1.02 to 1.11; Continuation group: OR 1.04; 95% CI 1.01 to 1.08). Use of somatic and particularly psychotropic co-medication was associated with escalation in both groups.

1  
2  
3  
4  
5  
6  
7  
8  
9  
10  
11  
12  
13  
14  
15  
16  
17  
18  
19  
20  
21  
22  
23  
24  
25  
26  
27  
28  
29  
30  
31  
32  
33  
34  
35  
36  
37  
38  
39  
40  
41  
42  
43  
44  
45  
46  
47  
48  
49  
50  
51  
52  
53  
54  
55  
56  
57  
58  
59  
60

*Conclusion:* Escalation of chronic analgesic treatment is associated with urban and deprived environments, and occurs in a context of [adding psychotropic medications](#), suggesting pain outcomes [in part reflect](#) area influences affecting mental health.

For peer review only

## Introduction

The validity of the well-known epidemiological association between urban environment and mental health<sup>1-3</sup> is supported by work showing that urban living is associated with increased amygdala activity<sup>4</sup>, a key region in the regulation of stress, affective experience and pain<sup>5,6</sup>.

Pain is the natural comorbid mental experience of somatic conditions<sup>7,8</sup>. In turn, pain is strongly influenced by comorbid common mental disorders particularly affective disorders<sup>9</sup><sup>10</sup>. Given evidence of urban impact on risk for common mental disorders<sup>11</sup>, including psychiatric medication prescriptions<sup>12</sup>, we hypothesized that pain outcomes, indexed through prescriptions, would be poorer in urban environments and disadvantaged urban neighbourhoods. Pain outcomes were examined at the level of primary care and specialist outpatient care and defined in two ways: (i) escalation of analgesic treatment (i.e. prescription of more potent analgesics) and (ii) co-prescription of psychotropic medication in addition to analgesic treatment.

## Objective

We examined the hypothesis that chronic pharmacological pain treatment of hospital outpatients and patients in primary care would show escalation of analgesics in association with the level of urbanisation and neighbourhood index of deprivation. It was predicted that the highest levels of urbanisation and neighbourhood deprivation would be associated with escalation of analgesic treatment to more potent pain medication (e.g. tramadol, morphine, methadone, etc.). Furthermore, we examined the hypothesis that prescriptions of psychotropic medication (e.g. antidepressants, antipsychotics, mood stabilizers, etc.) would

1  
2  
3  
4  
5  
6  
7  
8  
9  
10  
11  
12  
13  
14  
15  
16  
17  
18  
19  
20  
21  
22  
23  
24  
25  
26  
27  
28  
29  
30  
31  
32  
33  
34  
35  
36  
37  
38  
39  
40  
41  
42  
43  
44  
45  
46  
47  
48  
49  
50  
51  
52  
53  
54  
55  
56  
57  
58  
59  
60

be associated with escalation or de-escalation of analgesics in patients prescribed chronic analgesic treatment. Study hypotheses were specified before inspection of the data.

## Method

### *Data collection*

The investigation was carried out by analysing records pertaining to Dutch routine general practice and hospital outpatient treatment settings. Data were obtained from the IMS Health's longitudinal prescription database (Lifelink, affiliate Capelle ad IJssel, The Netherlands)<sup>13</sup>. This data source consists of anonymous longitudinal prescription records from a representative sample of pharmacies and dispensing GPs, covering 73% of the Dutch nationwide medication consumption of outpatients and primary care patients. The computerized *medication-dispensing histories* contain data regarding dispensed medications, type of prescriber, dispensing date, dispensed amount of medication, prescribed dosage, and length of prescription. Data for each patient were anonymously and independently sampled without linkage of prescriptions to the same patient across pharmacies, because patients in the Netherlands are usually loyal to a single pharmacy<sup>14</sup>.

Furthermore, research from the Dutch Foundation for Pharmaceutical Statistics (SFK) revealed that in the Netherlands, almost all patients make use of a pharmacy located in their area of living. Eighty-two percent of patients are living in a radius of 3 kilometres from their pharmacy<sup>15</sup>. Potential bias caused by patients getting hospitalized, moving to another address or dying was minimized by studying chronic pharmacological pain treatment, because there were dispensing records for these patients during the whole study period.

1  
2  
3  
4  
5  
6  
7 *Patient groups*

8  
9 Patient selection started with the identification of chronic users of analgesic medication  
10 during a six-month prescription period (hereafter: observation period). Chronic use was  
11 defined as in receipt of analgesic pharmacotherapy during at least two distinct moments  
12 covering an interval of at least two months. In order to track medication for other  
13 therapeutic indications (i.e. psychotropic medication and pharmaco-treatment for somatic  
14 disorders), patients were observed for a period of six months prior to initiation of analgesic  
15 treatment. Next, the cohort with chronic use of analgesics was divided into two groups.  
16  
17

18  
19 *Starters* were defined as patients who had not received any analgesics during the six-month  
20 period prior to the observation period (hereafter: *Starter group*). Patients who *continued*  
21 with pain medication that was already prescribed in the six month before the observation  
22 period formed the second group (hereafter: *Continuation group*). The latter group consisted  
23 of all patients who had already received analgesics in the first month of the six-month period  
24 prior to the observation period, in order to define chronic analgesic treatment before  
25 observation. All data captured a calendar period from May 2008 to September 2009 (Figure  
26 1).  
27  
28  
29  
30  
31  
32  
33  
34  
35  
36  
37  
38  
39

40  
41 **Figure 1: Starter group and Continuation Group of chronic analgesic treatment**

42  
43  
44  
45 Insert Figure 1  
46  
47  
48  
49

50 Legend: Schedule of prescriptions (Rx) in Starter group (top) and Continuation group (bottom) of  
51 chronic analgesic treatment covering a 12 month period. Months 7 to 12 are the observation period;  
52 months 1 to 6 are the pre-observation period.  
53  
54  
55

1  
2  
3  
4  
5  
6  
7 Data were obtained from the LRx database from month one to twelve as depicted in  
8  
9 Figure 1.. Use of other medications (e.g. psychotropic medication and medication for a broad  
10  
11 spectrum of somatic conditions) was collected for all patients as well, covering the period of  
12  
13 twelve months, consisting of (i) the pre-observation period (month one to six) and (ii) the  
14  
15 observation period (month seven to twelve)).  
16  
17  
18  
19

### 20 *Escalation of pharmacological pain treatment*

21  
22  
23 All individual prescriptions of analgesics were observed for each patient in both the Starter  
24  
25 and Continuation groups during the observation period and during the six months prior to  
26  
27 the observation period. At each dispensing date, analgesics were classified *a priori* in five  
28  
29 levels, in order of analgesic potency (Figure 2). Five escalation levels were provided, based  
30  
31 on a minor adaptation of the 3-step WHO-analgesic ladder<sup>16</sup>. Levels 5 and 4 are identical to  
32  
33 WHO steps 3 (strong opioids) and 2 (weak opioids), respectively. WHO step 1 (non-opioid  
34  
35 analgesics) was refined, in order to enable further and clinically relevant differentiation  
36  
37 between non-opioid analgesics (level 1: paracetamol, level 2: prostaglandin inhibitors, level  
38  
39 3: anticonvulsants)<sup>16-20</sup>. Furthermore, anti-epileptics were divided in anticonvulsants  
40  
41 predominantly prescribed in pain conditions (level 3a: gabapentin and pregabalin) and  
42  
43 anticonvulsants with best evidence for epilepsy treatment (level 3b: carbamazepine, valproic  
44  
45 acid, lamotrigine)<sup>19-21</sup>. In order to avoid prescription for indications of mood stabilisation or  
46  
47 epilepsy, the latter group was classified at level 3b only if prescribed in combination with  
48  
49 analgesic medication at level 1 or 2 (i.e. pain indication) (Figure 2).  
50  
51

52  
53 **Figure 2: 5 levels of analgesic potency, modified from the WHO-analgesic ladder<sup>16</sup>**  
54

1  
2  
3  
4  
5  
6  
7 Insert Figure 2  
8  
9

10 Legend:

11 Level 1 (i.e. lowest potency) to level 5 (i.e. highest potency)

- 12 (a) Gabapentine, pregabalin **in the absence of** other anti-epileptic drugs  
13 (b) Carbamazepine, valproic acid, lamotrigine **in combination with** medication **at** level 1 or 2  
14 (c) Tramadol, codeine  
15 (d) Methadone, oxycodone, hydromorphone, morphine, buprenorphine, fentanyl, sufentanil,  
16 pethidine  
17

18  
19  
20 Confirmation of escalation was based on the comparison of analgesic potency at the first  
21 dispensing day and **the last dispensing day within the observation period.**  
22  
23

24  
25 The comparison of first and last prescription of analgesics resulted in the following  
26 categories of analgesic escalation: neutral (i.e. no change of analgesic potency), escalation in  
27 analgesic treatment (i.e. change to a higher level of analgesic potency), or de-escalation in  
28 pharmacological pain treatment (i.e. change to a lower analgesic potency) (Table 1).  
29  
30  
31

32  
33 If patients received several analgesics on the same day, both the highest and the  
34 second highest level of analgesic potency were included in the analyses, in order to define  
35 escalation categories (e.g. a change from level 5 plus level 2 to level 5 plus level 3 indicating  
36 that escalation had occurred).  
37  
38  
39  
40  
41  
42  
43  
44

#### 45 *Determinants of escalation in analgesic treatment*

46

47  
48 Three groups of variables hypothesized to act as mediators or confounders were included in  
49 the analyses. The first group were patient characteristics such as sex (0=men, 1=women),  
50 age (in years) and the location of patient's pharmacy (defined by postal code). The latter  
51 variable defined the level of urbanisation following the definition of the Dutch Central  
52  
53  
54  
55

1  
2  
3  
4  
5  
6  
7  
8  
9  
10  
11  
12  
13  
14  
15  
16  
17  
18  
19  
20  
21  
22  
23  
24  
25  
26  
27  
28  
29  
30  
31  
32  
33  
34  
35  
36  
37  
38  
39  
40  
41  
42  
43  
44  
45  
46  
47  
48  
49  
50  
51  
52  
53  
54  
55  
56  
57  
58  
59  
60

Bureau of Statistics (CBS). Urbanisation is defined by CBS as the number of addresses relative to area surface, conform previous work with this variable in epidemiological studies<sup>22</sup>. Level 1 (i.e. highest level of urbanisation) consists of more than 2500 addresses per square-kilometre (km<sup>2</sup>); [level 2 = 1500 to 2500 addresses/km<sup>2</sup>, level 3 = 1000 to 1500 addresses/km<sup>2</sup>, level 4 = 500 to 1000 addresses/km<sup>2</sup>]. Level 5 (i.e. rural environment) consists of less than 500 addresses/km<sup>2</sup>; described in more detail elsewhere<sup>23</sup>.

Neighbourhood deprivation was defined dichotomously (0=no, 1=yes). The dichotomous measure of neighbourhood deprivation was developed by the Netherlands Institute of Research in Healthcare (NIVEL), using socio-economic indicators such as unemployment rate, average income, population density and ethnic variation. On the basis of empirical research in the Netherlands, NIVEL 's neighbourhood deprivation index (NDI) is calculated as follows:

$$\text{NDI} = ((\ln \text{percentage unemployed people} - 3.0236)/0.37706) - ((\ln \text{average income} - 2.8641)/0.14441) + ((\ln \text{population density} - 7.0132)/1.06699) + ((\ln \text{percentage people of "non-western" ethnicity})/1.11147).$$

NDIs were expressed continuously by NIVEL from low to high. Furthermore, NIVEL defined a dichotomous measure of deprivation at a cut-off of 5.5% (i.e. 885.000 people), in order to assess trends in the proportion of the Dutch population inhabiting an area with the highest NDI and for use in epidemiological research<sup>24</sup>.

Healthcare professionals receive higher levels of funding for their services in these deprived areas<sup>25</sup>. Neighbourhood deprivation was associated with level of urbanization: 86% of the sample living in deprived neighbourhoods lived in an area with the highest level of urbanisation. Moreover, the other patients (14%) living in deprived neighbourhoods lived in an area with the second highest level of urbanisation. The majority (76%) of those living in an area of the highest level of urbanisation did not live in a deprived neighbourhood (Table 1).



**Table 1: Sample, stratified by Urbanisation and Neighbourhood Deprivation**

| type of patient    | Urbanisation | Deprived Neighbourhood |       | % within Deprived Nbh | % within Urbanisation |
|--------------------|--------------|------------------------|-------|-----------------------|-----------------------|
|                    |              | No                     | Yes   |                       |                       |
| Starter group      | 1            | 34662                  | 10796 | 86,5%                 | 23,7%                 |
|                    | 2            | 48673                  | 1689  | 13,5%                 | 3,4%                  |
|                    | 3            | 31107                  |       | -                     | -                     |
|                    | 4            | 28283                  |       | -                     | -                     |
|                    | 5            | 11164                  |       | -                     | -                     |
|                    | total        | 153889                 | 12485 | 100,0%                | 7,5%                  |
| Continuation group | 1            | 59714                  | 18644 | 85,5%                 | 23,8%                 |
|                    | 2            | 81406                  | 3155  | 14,5%                 | 3,7%                  |
|                    | 3            | 50852                  |       | -                     | -                     |
|                    | 4            | 48511                  |       | -                     | -                     |
|                    | 5            | 20754                  |       | -                     | -                     |
|                    | total        | 261237                 | 21799 | 100,0%                | 7,7%                  |

Legend: The sample is described in absolute numbers for the Starter and the Continuation group, stratified by living in an urbanised area (level 1 to 5), and a dichotomous measure of neighbourhood deprivation. Furthermore, in the last two columns, tabulations are presented for living in a deprived neighbourhood as a function of level of urbanization (e.g. 86.5% of the sample living in deprived neighbourhoods lived in an area with urbanisation level 1/Starter group) and for level of urbanisation as a function of living in a deprived neighbourhood (e.g. a minority (23.8%) of those living in an area pertaining to urbanisation level 1 lived in a deprived neighbourhood/Continuation group).

Furthermore, psychotropic co-medication was classified into its different classes, and somatic co-medication was similarly grouped in 10 classes (ACE inhibitors, angiotensine II inhibitors; antidiabetics; beta-blockers; calcium antagonists; functional bowel drugs; laxatives; migraine medication; respiratory medication; steroid-antiphlogistics; stomach protectors) (Table 1 to 3). In the Starting group, occurrence of co-medication was time-coded at three levels according to the day of first occurrence (i.e. co-medication prescription before start with analgesics, at the same day or after start of analgesic treatment) (Table 2). In the Continuation group, occurrence of co-medication was recorded dichotomously (presence/absence), since it was impossible to distinguish occurrence of co-medication as before or at start of analgesic treatment (Table 3).

### Statistical analysis

First, we analysed the pattern of (de-) escalation in analgesic treatment by means of an

1  
2  
3  
4  
5  
6  
7 ordered logistic multivariable regression model with adjusted odds ratios (and 95%  
8 confidence interval) using SAS version 9<sup>26</sup>. Statistical significance for the model was defined  
9 at conventional alpha of 0.05. The dependent variable in this model was the development of  
10 a patient's analgesic treatment (de-escalation, neutral, escalation). Independent variables,  
11 entered simultaneously in the model, were demographic characteristics, neighbourhood  
12 deprivation, and urbanisation, use of psychotropic medication and use of somatic  
13 medication. In the Starting group, we also included first occurrence of co-medication. The  
14 modeling strategy was to build, first, a fully saturated model (including all variables), in order  
15 to avoid missing relevant information by leaving out non-significant variables. Second,  
16 backward elimination was carried out to find the best model fit.

17  
18  
19  
20  
21  
22  
23  
24  
25  
26  
27  
28 Models for Starter and Continuation groups were run separately, given different sample  
29 selection criteria. The ordered logistic multivariable regression model was chosen above the  
30 multinomial model, as the latter does not consider the natural order in our data regarding  
31 development of chronic pain treatment, ranging from de-escalation to neutral to escalation.

32  
33  
34  
35  
36 Proportional odds were assumed in the models of escalation and de-escalation of analgesic  
37 treatment, and analyses inspected for violation of this assumption. Test on the proportional  
38 odds assumption showed significance, which gave us the confidence to use the ordered  
39 logistic model. If a determinant was positively associated with escalation of analgesics,  
40 absence of this variable was associated negatively with escalation or positively with de-  
41 escalation in analgesic treatment (and vice versa). This offered advantage compared to  
42 separate models for escalation and de-escalation (such as consistency of model estimates)  
43 and avoided double use of patients with a neutral development of analgesic treatment.  
44  
45  
46  
47  
48  
49  
50  
51  
52  
53  
54  
55  
56  
57  
58  
59  
60

## Results

Overall, 449,410 patients were included, of which 166,374 were in the Starter group and 283,036 in the Continuation group. The baseline characteristics of both groups are shown in table 2.

**Table 2:** Baseline characteristics of the patient population with chronic analgesic treatment

|             |                                        | Starter group |                         |            | Continuation Group |            |            |
|-------------|----------------------------------------|---------------|-------------------------|------------|--------------------|------------|------------|
|             |                                        | Deprived      | Urbanicity <sup>1</sup> | Urbanicity | Deprived           | Urbanicity | Urbanicity |
|             |                                        | nb.hoods      | 1                       | 2-5        | nb. hoods          | 1          | 2-5        |
| Patients    | (Absolute)                             | 12,485        | 45,458                  | 120,916    | 21,799             | 78,358     | 204,678    |
| Change in   | Analgesics <sup>2</sup>                |               |                         |            |                    |            |            |
|             | De-escalation                          | 13.3%         | 12.1%                   | 10.4%      | 13.2%              | 12.5%      | 11.2%      |
|             | Neutral                                | 70.1%         | 71.6%                   | 74.5%      | 70.0%              | 71.4%      | 73.7%      |
|             | Escalation                             | 16.5%         | 16.3%                   | 15.1%      | 16.8%              | 16.1%      | 15.1%      |
| Gender      | Male                                   | 39.8%         | 39.3%                   | 40.3%      | 36.7%              | 35.2%      | 34.6%      |
|             | Female                                 | 60.2%         | 60.7%                   | 59.7%      | 63.3%              | 64.8%      | 65.4%      |
| Age (years) | 15-25                                  | 6.3%          | 6.1%                    | 6.5%       | 1.8%               | 1.6%       | 1.8%       |
|             | 26-40                                  | 23.8%         | 19.2%                   | 16.3%      | 14.0%              | 10.8%      | 9.7%       |
|             | 41-65                                  | 50.0%         | 49.6%                   | 50.9%      | 56.9%              | 53.4%      | 51.8%      |
|             | 65-85                                  | 19.8%         | 25.2%                   | 26.2%      | 27.3%              | 34.2%      | 36.7%      |
| First       | Analgesics                             |               |                         |            |                    |            |            |
|             | Level 1                                | 3.2%          | 3.9%                    | 4.0%       | 3.0%               | 3.8%       | 4.1%       |
|             | Level 2                                | 64.8%         | 66.6%                   | 72.6%      | 47.8%              | 47.1%      | 53.6%      |
|             | Level 3                                | 2.2%          | 2.5%                    | 2.6%       | 6.4%               | 8.1%       | 8.9%       |
|             | Level 4                                | 27.4%         | 24.2%                   | 18.3%      | 36.1%              | 33.9%      | 27.6%      |
|             | Level 5                                | 2.4%          | 2.9%                    | 2.6%       | 6.8%               | 7.2%       | 5.9%       |
|             | level 4/5                              | 29.8%         | 27.0%                   | 20.8%      | 42.8%              | 41.1%      | 33.5%      |
| Last        | Analgesics                             |               |                         |            |                    |            |            |
|             | Level 1                                | 3.4%          | 3.9%                    | 4.0%       | 3.4%               | 4.1%       | 4.3%       |
|             | Level 2                                | 61.9%         | 63.0%                   | 68.4%      | 44.5%              | 44.1%      | 50.1%      |
|             | Level 3                                | 3.0%          | 3.3%                    | 3.4%       | 7.0%               | 8.4%       | 9.2%       |
|             | Level 4                                | 27.6%         | 24.6%                   | 18.9%      | 36.8%              | 34.5%      | 28.4%      |
|             | Level 5                                | 4.1%          | 5.2%                    | 5.3%       | 8.3%               | 9.0%       | 7.9%       |
|             | Level 4/5                              | 31.7%         | 29.8%                   | 24.2%      | 45.1%              | 43.4%      | 36.3%      |
| Concomitant | Medication <sup>3</sup>                |               |                         |            |                    |            |            |
|             | Any concomitant drug                   | 78.8%         | 79.0%                   | 77.3%      | 89.3%              | 89.6%      | 88.0%      |
|             | Migraine medication                    | 3.9%          | 3.6%                    | 3.8%       | 5.9%               | 5.2%       | 5.1%       |
|             | Any psychotropic medication            | 35.1%         | 36.6%                   | 34.8%      | 51.6%              | 53.2%      | 50.2%      |
|             | TCA                                    | 5.2%          | 5.0%                    | 5.0%       | 9.5%               | 9.4%       | 9.6%       |
|             | Other AD                               | 2.4%          | 2.0%                    | 1.6%       | 4.0%               | 3.3%       | 2.7%       |
|             | Antipsychotics total                   | 4.1%          | 3.9%                    | 3.1%       | 6.7%               | 6.1%       | 4.9%       |
|             | Antipsychotics atypical                | 2.4%          | 2.2%                    | 1.5%       | 4.1%               | 3.5%       | 2.5%       |
|             | Antipsychotics classic                 | 2.0%          | 2.1%                    | 1.8%       | 3.2%               | 3.2%       | 2.7%       |
|             | Burpropion                             | 0.1%          | 0.1%                    | 0.1%       | 0.2%               | 0.2%       | 0.1%       |
|             | MAO inhibitors                         | 0.0%          | 0.0%                    | 0.1%       | 0.1%               | 0.1%       | 0.1%       |
|             | Mood stabilizers                       | 0.2%          | 0.3%                    | 0.2%       | 0.3%               | 0.4%       | 0.4%       |
|             | Sedatives                              | 27.0%         | 29.0%                   | 27.4%      | 41.5%              | 43.4%      | 40.6%      |
|             | SNRI                                   | 2.6%          | 2.4%                    | 2.2%       | 4.5%               | 4.0%       | 3.5%       |
|             | SSRI                                   | 7.5%          | 7.0%                    | 6.4%       | 10.3%              | 10.0%      | 9.0%       |
|             | Psycho-stimulants                      | 0.4%          | 0.5%                    | 0.5%       | 0.3%               | 0.5%       | 0.4%       |
|             | Any somatic medication                 | 72.3%         | 72.6%                   | 71.0%      | 83.0%              | 82.9%      | 81.7%      |
|             | Cardiovascular medication <sup>4</sup> | 30.9%         | 31.4%                   | 30.8%      | 35.2%              | 34.9%      | 34.9%      |
|             | Other Somatic medication <sup>5</sup>  | 65.2%         | 65.5%                   | 64.0%      | 76.9%              | 76.7%      | 75.4%      |

Legend: Patient characteristics are presented as percentages (e.g. age, gender, level of analgesic treatment, change in analgesic treatment (e.g. escalation, de-escalation, and neutral development of prescriptions), and concomitant medication). Absolute patient numbers are presented for the Starter and the Continuation group of chronic analgesic treatment concerning level of urbanicity and for neighbourhood deprivation.

- (1) Urbanicity = Urbanisation (level 1 = highest level of urbanisation; level 5 = rural environment)
- (2) Change in pain medication from first to last prescription (neutral = no change in level of potency, escalation = change to a higher level of analgesic potency, de-escalation = change to lower analgesic potency)
- (3) Concomitant drug use, observed during a period of 12 month
- (4) Cardiovascular medication: beta-blocker, calcium antagonist, ACE inhibitor, angiotensine II inhibitor
- (5) Gastro-intestinal medication: anti-diabetics, steroid-antiphogistics, respiratory medication

About 7.6% of all escalating patients were residing in a deprived neighbourhood, and approximately 27.6% were living in [an area of the highest level of urbanisation \(level 1\)](#) (Table 2). The majority [were](#) female, and there were more patients showing escalation (15.4%) than de-escalation (11.3%) of analgesic treatment. The majority of patients continued a neutral analgesic treatment regime (73.3%) (Table 2). Most of the patients were treated at level 2 or level 4 of analgesic potency. Almost all patients were using other medications, regardless of the different categories in table 1 (84.5%). Around half were using psychotropic medication (45.2%), most were using somatic co-medication (78.1%), and more than a third were using both (38.8%) (Table 2).

The Starter group mainly initiated an analgesic at level 2 (70.9%) and level 4 (19.9), whereas only 2.6% directly initiated at level 5. However, analgesic potency level 4 and 5 increased up to 20.5% respectively 5.2% by the time of the last prescription in the Starter group (Table 2).

1  
2  
3  
4  
5  
6  
7  
8  
9  
10  
11  
12  
13  
14  
15  
16  
17  
18  
19  
20  
21  
22  
23  
24  
25  
26  
27  
28  
29  
30  
31  
32  
33  
34  
35  
36  
37  
38  
39  
40  
41  
42  
43  
44  
45  
46  
47  
48  
49  
50  
51  
52  
53  
54  
55  
56  
57  
58  
59  
60

In the Continuation group, patients already received analgesics at a higher level of potency at inclusion compared to the last observed level of medication potency in the Starter group. Level 4 and 5 was observed in 35.6% at the start of the observation period, increasing to 38.3% at the end of observation period (Table 2).

Escalation of analgesic treatment was observed more often in deprived neighbourhoods and in areas of the highest levels of urbanisation (16.8% and 16.1% in the Continuation group, respectively 16.5% and 16.3% in the Starting group) compared to rural areas (15.1%) and non-deprived neighbourhoods (15.3%) (Table 2). The proportion of patients with neutral development of analgesic treatment was lower in deprived neighbourhoods and areas with the highest degree of urbanisation compared to less densely populated areas (Table 2).

In the Starter group, escalation was positively associated with lower level of first observed pain medication (highest adjusted Odds Ratio (OR) 58.23 at analgesic level 1; 95% Confidence Interval (CI) 53.60 to 63.27; lowest OR 1.36 at analgesic level 4; 95% CI 1.27 to 1.45; compared to reference level 5) (Table 3). Escalation was furthermore associated, in a dose-response fashion, with level of urbanisation (highest adjusted OR 1.24 at urbanisation level 1; 95% CI 1.18 to 1.30; compared to reference level 5) (Table 3). Furthermore, a weak but independent association existed between escalation and neighbourhood deprivation (OR 1.06; 95% CI 1.02 to 1.11) (Table 3). Use of tricyclic antidepressants (TCA), mood stabilizers (OR 1.36; 95% CI 1.07 to 1.42), sedatives, cardiovascular medication (OR 1.16; 95% CI 1.13 to 1.19) and medications for other somatic conditions was associated with analgesics escalation, when prescribed *before* start of analgesics (Table 3). Similarly, in the Starter group, escalation of analgesic treatment was also associated with the use of selective

1  
2  
3  
4  
5  
6  
7 noradrenalin serotonin reuptake inhibitors (SNRI), sedatives (OR 1.82; 95% CI 1.74 to 1.89),  
8  
9 TCA (OR 2.19; 95% CI 2.03 to 2.36), and antipsychotics (OR 2.43; 95% CI 2.19 to 2.68) when  
10  
11 prescribed *after* start of analgesics (Table 3). Negative associations with escalation (i.e.  
12  
13 positive association with de-escalation) were apparent for younger age, female sex, and  
14  
15 pharmacological migraine treatment. Furthermore, use of antipsychotics was negatively  
16  
17 associated with escalation if started *simultaneously* with analgesic treatment (OR 0.70; 95%  
18  
19 CI 0.58 to 0.84) (Table 3).

20  
21  
22 The use of selective serotonin reuptake inhibitors (SSRI), before, at or after start of  
23  
24 analgesic treatment was not associated with escalation of analgesics in the Starter group  
25  
26 (Table 3).

27  
28 In the Starter group, the original fully saturated model and the model after backward  
29  
30 elimination revealed the same variables associated significantly with escalation in chronic  
31  
32 pharmacological pain treatment (Table 3).

33  
34  
35 **Table 3: Associations with escalation in pharmacological pain treatment for the Starter**  
36  
37 **Group of chronic analgesic treatment**

| Exposure                  |                                         | Adj. Odds Ratio | 95% CI <sup>1</sup> |       |
|---------------------------|-----------------------------------------|-----------------|---------------------|-------|
|                           |                                         |                 | Lower               | Upper |
| Analgesics <sup>2</sup>   | Level 1                                 | 58.23           | 53.60               | 63.27 |
|                           | Level 2                                 | 17.92           | 16.75               | 19.16 |
|                           | Level 3                                 | 4.66            | 4.23                | 5.14  |
|                           | Level 4                                 | 1.36            | 1.27                | 1.45  |
|                           | Level 5                                 | Reference       | -                   | -     |
| Gender                    | Female                                  | 0.97            | 0.95                | 0.99  |
|                           | Male                                    | Reference       | 0.00                | 0.00  |
| Age (years)               | 15-25                                   | 0.73            | 0.69                | 0.77  |
|                           | 26-40                                   | 0.81            | 0.78                | 0.84  |
|                           | 41-65                                   | 0.87            | 0.85                | 0.90  |
|                           | 66-85                                   | Reference       | -                   | -     |
|                           |                                         |                 |                     |       |
| Urbanization <sup>3</sup> | 1                                       | 1.24            | 1.18                | 1.30  |
|                           | 2                                       | 1.16            | 1.11                | 1.22  |
|                           | 3                                       | 1.11            | 1.06                | 1.17  |
|                           | 4                                       | 1.07            | 1.02                | 1.13  |
|                           | 5                                       | Reference       | -                   | -     |
| Deprived                  | Yes                                     | 1.07            | 1.02                | 1.11  |
| Neighbourhood             | No                                      | Reference       | -                   | -     |
| SNRI                      | <sup>4</sup> Before start of analgesics | 1.05            | 0.96                | 1.14  |
|                           | Same start date                         | 1.28            | 0.97                | 1.69  |
|                           | After analgesics started                | 1.26            | 1.09                | 1.45  |
|                           | None                                    | Reference       | -                   | -     |
| SSRI                      | Before start of analgesics              | 0.97            | 0.92                | 1.02  |
|                           | Same start date                         | 0.97            | 0.83                | 1.15  |
|                           | After analgesics started                | 1.07            | 0.97                | 1.18  |
|                           | None                                    | Reference       | -                   | -     |
| TCA                       | Before start of analgesics              | 1.23            | 1.15                | 1.32  |
|                           | Same start date                         | 1.32            | 1.12                | 1.54  |
|                           | After analgesics started                | 2.19            | 2.03                | 2.36  |
|                           | None                                    | Reference       | -                   | -     |
| Other AD                  | Before start of analgesics              | 1.03            | 0.93                | 1.15  |
|                           | Same start date                         | 0.93            | 0.71                | 1.21  |
|                           | After analgesics started                | 1.22            | 1.06                | 1.42  |
|                           | None                                    | Reference       | -                   | -     |
| Antipsychotics            | Before start of analgesics              | 0.92            | 0.85                | 1.01  |
|                           | Same start date                         | 0.69            | 0.58                | 0.83  |
|                           | After analgesics started                | 2.42            | 2.18                | 2.67  |
|                           | None                                    | Reference       | -                   | -     |
| Mood stabilizers          | Before start of analgesics              | 1.40            | 1.10                | 1.79  |
|                           | Same start date                         | 0.91            | 0.43                | 1.89  |
|                           | After analgesics started                | 0.71            | 0.39                | 1.31  |
|                           | None                                    | Reference       | -                   | -     |
| Sedatives                 | Before start of analgesics              | 1.24            | 1.20                | 1.28  |
|                           | Same start date                         | 1.25            | 1.18                | 1.33  |
|                           | After analgesics started                | 1.82            | 1.74                | 1.89  |
|                           | None                                    | Reference       | -                   | -     |
| Cardio-Vascular drugs     | Before start of analgesics              | 1.16            | 1.13                | 1.19  |
|                           | Same start date                         | 0.86            | 0.79                | 0.95  |
|                           | After analgesics started                | 1.35            | 1.26                | 1.45  |
|                           | None                                    | Reference       | -                   | -     |
| Other Somatic drugs       | Before start of analgesics              | 1.25            | 1.22                | 1.29  |
|                           | Same start date                         | 1.11            | 1.07                | 1.15  |
|                           | After analgesics started                | 1.19            | 1.15                | 1.23  |
|                           | None                                    | Reference       | -                   | -     |
| Migraine medication       | Before start of analgesics              | 0.83            | 0.77                | 0.89  |
|                           | Same start date                         | 0.95            | 0.78                | 1.17  |
|                           | After analgesics started                | 0.91            | 0.81                | 1.02  |
|                           | None                                    | Reference       | -                   | -     |



## Legend:

- (1) 95% CI: confidence interval
- (2) Escalation = change to a higher level of analgesic potency, level 5 = highest level
- (3) 1 = highest level of urbanisation, 5 = rural environment
- (4) Starting date of medication (before, at the same day or after start of analgesics)

In the Continuation group, escalation of analgesics was positively associated with

lowest levels of first observed analgesics (highest adjusted OR 16.00 at analgesic level 1; 95% CI 15.20 to 16.85; lowest OR 1.55 at analgesic level 4; 95% CI 1.50 to 1.61; compared to reference level 5) (Table 4). Furthermore, escalation was associated with level of urbanisation in a dose response fashion (highest adjusted OR 1.19 at level 1; 95% CI 1.14 to 1.23; compared to reference level 5) (Table 4). There was also an association between escalation and deprived neighbourhoods, use of SSRI, SNRI, TCA, all antipsychotics, and sedatives (OR 1.31; 95% CI 1.29 to 1.33) as well as use of somatic co-medication (OR 1.12; 95% CI 1.10 to 1.14) (Table 4). De-escalation was associated with female sex, younger age, treatment of migraine, and use of second-generation antipsychotics (OR 0.80; 95% CI 0.70 to 0.91) (Table 4).

The saturated model showed that 22 out of 29 variables had significant associations. All these variables remained significant in the backward elimination approach. One additional variable displayed a significant association after backward elimination: 'TCA high dosage'. The OR's did not (16 variables), or only minimally (6 variables) differ between the fully saturated model and the backward elimination model. The only variable showing a degree of difference was 'TCA total' (fully saturated model: OR = 1.19 (CI: 1.06 – 1.32); backward elimination model: OR = 1.33 (CI: 1.29 – 1.36)) (Table 4).

**Table 4: Associations with escalation in pharmacological pain treatment for the Continuation Group of chronic analgesic treatment**

| Exposure                   |                            | Adjusted Odds Ratio | 95% CI <sup>1</sup> |       |
|----------------------------|----------------------------|---------------------|---------------------|-------|
|                            |                            |                     | Lower               | Upper |
| Analgesics <sup>2</sup>    | Level 1                    | 16.00               | 15.20               | 16.85 |
|                            | Level 2                    | 7.87                | 7.59                | 8.16  |
|                            | Level 3                    | 3.14                | 3.00                | 3.28  |
|                            | Level 4                    | 1.55                | 1.50                | 1.61  |
|                            | Level 5                    | Reference           | -                   | -     |
| Gender                     | Female                     | 0.96                | 0.94                | 0.98  |
|                            | Male                       | Reference           | -                   | -     |
| Age (years)                | 15-25                      | 0.91                | 0.85                | 0.97  |
|                            | 26-40                      | 0.98                | 0.95                | 1.01  |
|                            | 41-65                      | 0.99                | 0.97                | 1.01  |
|                            | 66-85                      | Reference           | -                   | -     |
| Urbanization <sup>3</sup>  | 1                          | 1.18                | 1.14                | 1.23  |
|                            | 2                          | 1.14                | 1.10                | 1.17  |
|                            | 3                          | 1.08                | 1.04                | 1.12  |
|                            | 4                          | 1.05                | 1.01                | 1.09  |
|                            | 5                          | Reference           | -                   | -     |
| Deprived Neighbourhood     | Yes                        | 1.04                | 1.01                | 1.08  |
|                            | No                         | Reference           | -                   | -     |
| SNRI                       |                            | 1.19                | 1.02                | 1.40  |
| SSRI                       |                            | 1.03                | 1.004               | 1.07  |
| TCA <sup>4</sup>           |                            | 1.19                | 1.06                | 1.32  |
| Other AD                   |                            | 1.08                | 1.03                | 1.14  |
| Antipsychotics             | Total                      | 1.24                | 1.08                | 1.43  |
|                            | 1 <sup>st</sup> generation | 1.01                | 0.88                | 1.15  |
|                            | 2 <sup>nd</sup> generation | 0.80                | 0.70                | 0.91  |
| Mood stabilizers           |                            | 0.97                | 0.85                | 1.10  |
| Sedatives                  |                            | 1.31                | 1.29                | 1.34  |
| Migraine                   |                            | 0.95                | 0.91                | 0.99  |
| Cardio Vascular Drugs      |                            | 1.12                | 1.10                | 1.14  |
| Other Somatic Drug classes |                            | 1.12                | 1.10                | 1.14  |

Legend:

(1) 95% CI: confidence interval

(2) Escalation = change to a higher level of analgesic potency, level 5 = highest level

(3) 1 = highest level of urbanisation, 5 = rural environment

(4) TCA total (fully saturated model: OR = 1.19 (CI: 1.06 – 1.32); BWE model: OR = 1.33 (CI: 1.29 – 1.36))

Over time, the escalation process continues even after the first 6 months of chronic analgesic treatment. In the Starter group, opioid-analgesics (level 4/5) were dispensed in 29.8% of patients living in a deprived neighbourhood. In contrast, 42.8% of patients in deprived neighbourhoods used opioids in the Continuation group, after one year of prescription. A similar, but attenuated development was seen at urbanisation level 1 and level 2 to 5 (Table 2).

## Discussion

Escalation of chronic analgesic treatment was observed more often in urban areas and deprived neighbourhoods within urban areas, suggesting pain outcomes either are associated with individual characteristics that are more prevalent in urban and deprived areas, or subject to contextual influences, like area-level stress or social fragmentation, regardless of individual level characteristics. One individual level variable that may explain part of the association with urbanicity and deprivation is socio-economic status<sup>27 28</sup>, which was not available for inclusion in the model. Nevertheless, the fact that the association with urbanicity remained with deprivation adjusted for in the same model, suggests that urban effects may not be reducible entirely to individual-level socio-economic status. However, the findings could also be attributed to reverse causation, i.e. patients with worsening pain may move into more urban and deprived neighbourhoods as a consequence of being disabled due to ill health. Although unlikely to entirely explain the current findings, it cannot be excluded.

Regardless of the underlying mechanism, results clearly echo findings of unconfounded higher rates of poor mental health in areas of higher levels of urbanisation and greater neighbourhood deprivation<sup>11 29</sup>, and suggest that the outcome of mental disorder comorbidity associated with somatic disorders shows similar predictable variation. Functional pain syndromes and psychiatric disorders show high levels of interdependency<sup>30-35</sup>, and psychiatric conditions enhance severity of somatic symptoms<sup>36</sup>. Thus, part of the mechanism underlying the association between pharmacological pain escalation and urban environment may be explained by urbanisation increasing the risk for mental ill health. This hypothesis is supported by the findings, as in both the Starter and the Continuation groups, escalation of chronic analgesic treatment was associated not only with urban environment

1  
2  
3  
4  
5  
6  
7 and neighbourhood deprivation, but also with prescription of various psychotropic  
8  
9 medications prescribed in association. In general, the positive association of escalating  
10  
11 analgesic treatment with psychotropic medication was as strong or even stronger than the  
12  
13 association with prescribed somatic co-medication, with the exception of the observed de-  
14  
15 escalating effect, in the Continuation group, of second-generation antipsychotics, which  
16  
17 possess powerful analgesic properties<sup>37,38</sup>. This is accordance with the literature, given the  
18  
19 fact that psychiatric conditions can enhance symptom severity in somatic patients<sup>36</sup>, which  
20  
21 sometimes may impact even more that the somatic condition itself<sup>39</sup>.

22  
23  
24 Although the absolute difference between analgesic escalation in the urban vs. less  
25  
26 urban environment was small, this difference may be relevant from a public health  
27  
28 perspective, given the high rate of painful conditions in the general population.

29  
30 Furthermore, prevention of persistent pain states is relevant with regard to costs<sup>40</sup>. A more  
31  
32 effective treatment of persistent pain, including treatment of psychiatric comorbidity, may  
33  
34 have a cost-saving effect. Targeting populations with painful conditions for early recognition  
35  
36 and treatment of mental health problems may not only be cost-effective from a public  
37  
38 health perspective, but also represent an area of considerable unmet clinical need, since  
39  
40 opioid escalation is a frequent inflationary development in the treatment of painful  
41  
42 conditions<sup>41,42</sup>. Moreover, broadening the pain agenda to a better understanding of  
43  
44 associated mental health problems could minimize failed surgery outcomes, for example in  
45  
46 patients with undetected mental disorders. For instance, new surgical procedures were  
47  
48 found to be more common in chronic back pain (CBP) patients *with* Post-traumatic Stress  
49  
50 Disorder compared to CBP patients without<sup>43</sup>. Similarly, depression was demonstrated in  
51  
52 47.4 % of patients with low back pain who had no surgery, in 50% of those with one surgical  
53  
54 procedure, and in 62.5 % of those who had undergone surgery more than once<sup>44</sup>. Influencing

1  
2  
3  
4  
5  
6  
7 central pain sensitization by [providing](#) adequate antidepressant treatment in depressive  
8 conditions may help [prevent](#) surgical [escalation](#).  
9

10  
11 [Odds ratios for escalation of analgesics in relation to original level of analgesics may](#)  
12 [represent ceiling effects in both starter and continuation groups - patients already at level 5](#)  
13 [have nowhere stronger to go; treatment of patients at level 1 at baseline can escalate to](#)  
14 [stronger medication. Ceiling effects may reflect the pattern of prescribing analgesics in](#)  
15 [general practice. Given these, it has been suggested that the WHO analgesic ladder is in](#)  
16 [need of updating](#)<sup>45</sup>. For example, Vargas-Schaffer is broadening the ladder with a 4<sup>th</sup> surgical  
17 [step; in the current article, however, we guide attention to treatment aspects related to](#)  
18 [underestimated mental disorder comorbidity in persistent pain states.](#)  
19  
20  
21  
22  
23  
24  
25  
26  
27

28 The ~~speculative~~ question remains to what degree escalation of analgesic treatment  
29 and its association with psychotropic medication reflects therapeutic [paradigms](#) to remedy  
30 pain, treatment of psychiatric comorbidity, or a cause of psychopathology. In the Starter  
31 and the Continuation group of chronic analgesic treatment, escalation of analgesics was  
32 consistently and positively associated with the use of TCA. This prescription habit may reflect  
33 routine [off-label](#) paradigms in the pharmacological treatment of pain syndromes<sup>10 46-48</sup>.  
34 However, given the evidence regarding TCA's efficacy in pain conditions, negative rather  
35 than positive associations with escalation of analgesics should have been expected. More  
36 likely, since the association with TCAs was as strong as the association of sedatives with  
37 analgesic escalation, it may be a reflection of affective or addictive comorbidity in persistent  
38 pain, for instance in vulnerable cases of opiate-induced sensitization, tolerance and  
39 hyperalgesia<sup>49-55</sup>. [Our data indicate that escalation may represent an ongoing process after](#)  
40 [even months of treatment, which occurs not exclusively in the context of environmental](#)  
41  
42  
43  
44  
45  
46  
47  
48  
49  
50  
51  
52  
53  
54  
55

1  
2  
3  
4  
5  
6  
7 deprivation. Escalation may also be driven to a degree by patient factors such as opioid  
8 tolerance, opioid-induced hyperalgesia<sup>52</sup>, or disease progression.

9  
10  
11 Given the literature on this topic<sup>46-50 56</sup>, negative associations of particularly  
12 antidepressants with escalation of chronic analgesic treatment would have been expected.  
13 Nevertheless, negative associations between escalation of chronic analgesic treatment were  
14 also found, for example with migraine treatment (Tables 3 and 4). Moreover, the use of  
15 antipsychotics was negatively associated with analgesic escalation in the Starter group - if  
16 prescribed after start of analgesic treatment. In the Continuation group, de-escalation was  
17 specifically associated with the use of second-generation antipsychotics. This outcome is  
18 interesting and deserves further investigation, given that limited evidence for the efficacy of  
19 antipsychotics in pain conditions already exists<sup>37 38</sup>.

20  
21  
22  
23  
24  
25  
26  
27  
28  
29  
30  
31 The results of the current study should be seen in the light of several limitations. The  
32 use of routine data rather than a targeted data collection could have caused more random  
33 error resulting in type II error. Unidentified confounding may have played a role, as  
34 randomization was not possible and pre-post designs are sensitive to effects of unmeasured  
35 changes affecting outcome measures over time. Another limitation is the lack of outcomes  
36 other than urbanization, psychotropic medication or somatic co-medication. For instance,  
37 there were no estimates regarding care consumption or illness-related sick leave. Changes in  
38 patient-related outcomes like illness severity, global functioning, quality of life and  
39 treatment satisfaction should also form part of prospective evaluations. The type of data  
40 used is subject to the possibility of ecological fallacy: people whose pharmacy is in a  
41 deprived or urban neighbourhood do not necessarily experience that level of deprivation or  
42 urbanicity. Furthermore, this study only collected data over a twelve-month period. Affect

1  
2  
3  
4  
5  
6  
7 and pain monitoring deserves longer evaluation. Finally, due to the study design,  
8  
9 associations do not allow for causal inference.

#### 10 11 WHAT IS ALREADY KNOWN ON THIS TOPIC

12  
13  
14 Numerous observational studies have observed higher rates of poor mental health in  
15  
16 urban and deprived neighbourhood environments.  
17

18  
19  
20 Pain syndromes and [mental](#) disorders show high levels of interdependency, and  
21  
22 [mental disorders are known to](#) enhance severity of somatic symptoms.  
23  
24

#### 25 26 WHAT THIS STUDY ADDS

27  
28  
29 Escalation of chronic analgesic treatment in persistent pain [states](#) is associated with  
30  
31 urban environments and deprived neighbourhoods, and occurs in a context of  
32  
33 increased levels of psychotropic medication [prescribing](#), suggesting persistent pain  
34  
35 outcomes are associated with area influences affecting mental health.  
36  
37

38  
39 *Contributors:* CL, SB and JvO were principal investigators of the study. SB analysed the data  
40  
41 in collaboration with CL, JvO, and JS. CL and JvO drafted the paper. All authors contributed to  
42  
43 subsequent drafts of the paper, including the final version. JvO is guarantor.  
44  
45

46  
47 *External funding:* Eli Lilly provided funding to IMS Health for data analysis. External funding  
48  
49 did not support any other aspect of the study. All authors contributed independently from  
50  
51 funders to this study; and all authors had full access to and can take responsibility for the  
52  
53 data and analyses.  
54

1  
2  
3  
4  
5  
6  
7 *Competing interests:* All authors have completed the Unified Competing Interest form at  
8 [www.icmje.org/coi\\_disclosure.pdf](http://www.icmje.org/coi_disclosure.pdf) (available on request from the corresponding author) and  
9 declare: no support from any organisation for the submitted work, with the exception of  
10 above-mentioned funding to IMS Health for data analysis; no financial relationships with any  
11 organisation that might have an interest in the submitted work; and no other relationships  
12 or activities that could appear to have influenced the submitted work.  
13  
14  
15  
16  
17

18  
19 *License for publication:* All authors grant an exclusive license (or non exclusive for  
20 government employees) on a worldwide basis to the BMJ Publishing Group LTD and its  
21 licensees, to permit this article (if accepted) to be published in BMJ editions and any other  
22 BMJPG products and to exploit all subsidiary rights, as set out on:  
23  
24  
25  
26 <http://resources.bmj.com/bmj/authors/checklists-forms/license-for-publication>.  
27  
28  
29  
30  
31  
32  
33  
34  
35  
36  
37  
38  
39  
40  
41  
42  
43  
44  
45  
46  
47  
48  
49  
50  
51  
52  
53  
54  
55  
56  
57  
58  
59  
60



## References

1. Lofors J, Sundquist K. Low-linking social capital as a predictor of mental disorders: a cohort study of 4.5 million Swedes. *Social science & medicine* 2007;64(1):21-34.
2. Thomas H, Weaver N, Patterson J, et al. Mental health and quality of residential environment. *Br J Psychiatry* 2007;191:500-5.
3. Ivory VC CS, Blakely T, Dew K. When does neighbourhood matter? Multilevel relationships between neighbourhood social fragmentation and mental health. *Social science & medicine* 2011;72:1993-2002.
4. Lederbogen F, Kirsch P, Haddad L, et al. City living and urban upbringing affect neural stress processing in humans. *Nature* 2011;474(7352):498-501.
5. Hubbard CS Labus JS, Bueller J, et al. Corticotropin-releasing factor receptor 1 antagonist alters regional activation and effective connectivity in an emotional-arousal circuit during expectation of abdominal pain. *J Neurosci* 2011;31(35):12491-500.
6. Murrough JW, Huang Y, Hu J, et al. Reduced amygdala serotonin transporter binding in posttraumatic stress disorder. *Biol Psychiatry* 2011(Aug 17):[Epub ahead of print].
7. Smith HS HR, Clauw D. Fibromyalgia: an afferent processing disorder leading to a complex pain generalized syndrome. *Pain Physician* 2011;14(2):E217-45.
8. Price DD CJ, Zhou Q, Verne GN, et al. Widespread hyperalgesia in irritable bowel syndrome is dynamically maintained by tonic visceral impulse input and placebo/nocebo factors: evidence from human psychophysics, animal models and neuroimaging. *Neuroimage* 2009;47(3):995-1001.
9. Wise TN, Fishbain DA, Holder-Perkins V. Painful physical symptoms in depression: a clinical challenge. *Pain medicine* 2007;8 Suppl 2:S75-82.
10. Goldenberg DL. Pain/Depression dyad: a key to a better understanding and treatment of functional somatic syndromes. *Am J Med* 2010;123(8):675-82.
11. [Peen J, Schoevers RA, Beekman AT, et al. The current status of urban-rural differences in psychiatric disorders. \*Acta Psychiatr Scand\* 2010;121\(2\):84-93.](#)
12. Crump C, Sundquist K, Sundquist J, et al. Neighborhood deprivation and psychiatric medication prescription: a Swedish national multilevel study. *Ann Epidemiol*;21(4):231-7.
13. Netelenbos JC, Geusens PP, Ypma G, et al. Adherence and profile of non-persistence in patients treated for osteoporosis--a large-scale, long-term retrospective study in The Netherlands. *Osteoporos Int*;22(5):1537-46.
14. Buurma H, Bouvy ML, De Smet PA, et al. Prevalence and determinants of pharmacy shopping behaviour. *J Clin Pharm Ther* 2008;33(1):17-23.
15. <http://www.sfk.nl/nieuws-publicaties/PW/2003/2003-15.htm>.
16. [World Health Organization. \*Traitement de la douleur cancéreuse\*. Geneva, Switzerland: World Health Organization; 1987.](#)
17. [Wiffen PJ, Derry S, Moore RA, et al. Carbamazepine for acute and chronic pain in adults. \*Cochrane Database Sys Rev\* 2011;\(1\):CD005451.](#)
18. [Wiffen PJ, Derry S, Moore RA, et al. Lamotrigine for acute and chronic pain. \*Cochrane Database Sys Rev\* 2011;\(2\):CD006044.](#)
19. [Moore RA, Wiffen PJ, Derry S, et al. Gabapentin for chronic neuropathic pain and fibromyalgia in adults. \*Cochrane Database Sys Rev\* 2011;\(3\):CD007938.](#)
20. [Moore RA, Straube S, Wiffen PJ, et al. Pregabalin for acute and chronic pain in adults. \*Cochrane Database Sys Rev\* 2009;\(3\):CD007076.](#)

1  
2  
3  
4  
5  
6  
7  
8  
9  
10  
11  
12  
13  
14  
15  
16  
17  
18  
19  
20  
21  
22  
23  
24  
25  
26  
27  
28  
29  
30  
31  
32  
33  
34  
35  
36  
37  
38  
39  
40  
41  
42  
43  
44  
45  
46  
47  
48  
49  
50  
51  
52  
53  
54  
55  
56  
57  
58  
59  
60

21. Perucca E, Tomson T. The pharmacological treatment of epilepsy in adults. *Lancet Neurol* 2011;10(5):446-56.
22. Van Os J, Hanssen M, Bijl RV, et al. Prevalence of psychotic disorder and community level of psychotic symptoms: an urban-rural comparison. *Arch Gen Psychiatry* Jul 2001;58:663-668.
23. Central Bureau of Statistics. Bevolking der gemeenten van Nederland. *The Hague, The Netherlands: CBS Publications* 1993.
24. Wieggers TA DW. Herijking stedelijke achterstandsgebieden. *Utrecht, The Netherlands: NIVEL publications* 2008.
25. Nza, tariefbeschikking 5000-1900-09-3, 30 juni 2009. <http://www.naz.nl/>.
26. <http://www.sas.com/>.
27. Drukker M, van Os J. Mediators of neighbourhood socioeconomic deprivation and quality of life. *Soc Psychiatry Psychiatric Epidemiol* 2003;38(12):698-706.
28. Skapinakis P, Weich S, Lewis G, et al. Socio-economic position and common mental disorders. Longitudinal study in the general population in the UK. *Br J Psychiatry* 2006;189:109-17.
29. March D, Hatch SL, Morgan C, et al. Psychosis and place. *Epidemiol Rev* 2008;30:84-100.
30. Hotopf M, Mayou R, Wadsworth M, et al. Temporal relationships between physical symptoms and psychiatric disorder. Results from a national birth cohort. *Br J Psychiatry* 1998;173:255-61.
31. Kroenke K, Jackson JL, Chamberlin J. Depressive and anxiety disorders in patients presenting with physical complaints: clinical predictors and outcome. *Am J Med* 1997;103(5):339-47.
32. Barsky AJ, Orav EJ, Bates DW. Somatization increases medical utilization and costs independent of psychiatric and medical comorbidity. *Archives Gen Psychiatry* 2005;62(8):903-10.
33. Fink P, Hansen MS, Oxhøj ML. The prevalence of somatoform disorders among internal medical inpatients. *J Psychosom Res* 2004;56(4):413-8.
34. Levy RL, Olden KW, Naliboff BD, et al. Psychosocial aspects of the functional gastrointestinal disorders. *Gastroenterology* 2006;130(5):1447-58.
35. Leue C, Driessen G, Strik JJ, et al. Managing complex patients on a medical psychiatric unit: an observational study of university hospital costs associated with medical service use, length of stay, and psychiatric intervention. *J Psychosom Res* 2010;68(3):295-302.
36. Meyer T, Klemme H, Herrmann C. Depression but not anxiety is a significant predictor of physicians' assessments of medical status in physically ill patients. *Psychother Psychosom* 2000;69(3):147-54.
37. Freedendfeld RN, Murray M, Fuchs PN, et al. Decreased pain and improved quality of life in fibromyalgia patients treated with olanzapine, an atypical neuroleptic. *Pain Pract* 2006;6(2):112-8.
38. Seidel S, Aigner M, Ossege M, et al. Antipsychotics for acute and chronic pain in adults. *Cochrane Database Sys Rev* 2008(4):CD004844.
39. Kim KW, Han JW, Cho HJ, et al. Association between comorbid depression and osteoarthritis symptom severity in patients with knee osteoarthritis. *J Bone Joint Surg Am* 2011;93(6):556-63.
40. Maniadakis N, Gray A. The economic burden of back pain in the UK. *Pain* 2000;84:95-103.

- 1
- 2
- 3
- 4
- 5
- 6
- 7 [41. Seal KH, Shi Y, Cohen BE, et al. Association of mental health disorders with prescription](#)
- 8 [opioids and high-risk opioid use in US veterans of Iraq and Afghanistan. \*JAMA\*](#)
- 9 [2012;307\(9\):940-7.](#)
- 10 [42. Bohnert AS, Valenstein M, Bair MJ, et al. Association between opioid prescribing patterns](#)
- 11 [and opioid overdose-related deaths. \*JAMA\* 2011;305\(13\):1315-21.](#)
- 12 [43. Dersh J et al. Chronic pain and psychopathology: research findings and theoretical](#)
- 13 [considerations. \*Psychosom Med\* 2002;64:773-86.](#)
- 14 [44. Edit V, Eva S, Maria K, et al. Psychosocial, educational, and somatic factors in chronic](#)
- 15 [non-specific low back pain. \*Rheumatol Int\* 2012 Apr 3.\[Epub ahead of print\]](#)
- 16 [45. Vargas-Schaffer G. Is the WHO analgesic ladder still valid? – Twenty-four years of](#)
- 17 [experience. \*Can Fam Physician\* 2010;56:514-7.](#)
- 18 46. Hauser W, Bernardy K, Uceyler N, et al. Treatment of fibromyalgia syndrome with
- 19 antidepressants: a meta-analysis. *JAMA* 2009;301(2):198-209.
- 20 47. Ford AC, Talley NJ, Schoenfeld PS, et al. Efficacy of antidepressants and psychological
- 21 therapies in irritable bowel syndrome: systematic review and meta-analysis. *Gut*
- 22 2009;58(3):367-78.
- 23 48. Saarto T, Wiffen PJ. Antidepressants for neuropathic pain. *Cochrane Database Sys Rev*
- 24 2007(4):CD005454.
- 25 49. Krebs EE, Gaynes BN, Gartlehner G, et al. Treating the physical symptoms of depression
- 26 with second-generation antidepressants: a systematic review and metaanalysis.
- 27 *Psychosomatics* 2008;49(3):191-8.
- 28 50. Arnold LM, Hudson JI, Wang F, et al. Comparisons of the efficacy and safety of duloxetine
- 29 for the treatment of fibromyalgia in patients with versus without major depressive
- 30 disorder. *Clin J Pain* 2009;25(6):461-8.
- 31 51. Arnold LM, Hudson JI, Keck PE, et al. Comorbidity of fibromyalgia and psychiatric
- 32 disorders. *J Clin Psychiatry* 2006;67(8):1219-25.
- 33 52. Bekhit MH. Opioid-induced hyperalgesia and tolerance. *Am J Ther* 2010;17(5):498-510.
- 34 53. Berton O, McClung CA, Dileone RJ, et al. Essential role of BDNF in the mesolimbic
- 35 dopamine pathway in social defeat stress. *Science* 2006;311(5762):864-8.
- 36 54. Upadhyay J, Maleki N, Potter J, et al. Alterations in brain structure and functional
- 37 connectivity in prescription opioid-dependent patients. *Brain* 2010;133(Pt 7):2098-
- 38 114.
- 39 55. Angst MS, Clark JD. Opioid-induced hyperalgesia: a qualitative systematic review.
- 40 *Anesthesiology* 2006;104(3):570-87.
- 41 56. Rayner L, Price A, Evans A, et al. Antidepressants for depression in physically ill people.
- 42 *Cochrane Database Sys Rev* 2010(3):CD007503.
- 43
- 44
- 45
- 46
- 47
- 48
- 49
- 50
- 51
- 52
- 53
- 54
- 55
- 56
- 57
- 58
- 59
- 60



**Observational evidence that urbanisation and neighbourhood deprivation are associated with escalation in chronic pharmacological pain treatment - a longitudinal population-based study in the Netherlands**

|                                 |                                                                                                                                                                                                                                                                                                                                                                                                                                                                                                                                  |
|---------------------------------|----------------------------------------------------------------------------------------------------------------------------------------------------------------------------------------------------------------------------------------------------------------------------------------------------------------------------------------------------------------------------------------------------------------------------------------------------------------------------------------------------------------------------------|
| Journal:                        | <i>BMJ Open</i>                                                                                                                                                                                                                                                                                                                                                                                                                                                                                                                  |
| Manuscript ID:                  | bmjopen-2011-000731.R2                                                                                                                                                                                                                                                                                                                                                                                                                                                                                                           |
| Article Type:                   | Research                                                                                                                                                                                                                                                                                                                                                                                                                                                                                                                         |
| Date Submitted by the Author:   | 22-Jun-2012                                                                                                                                                                                                                                                                                                                                                                                                                                                                                                                      |
| Complete List of Authors:       | Leue, Carsten; Maastricht University Medical Centre, Department of Psychiatry and Medical Psychology<br>Buijs, Servaas; IMS Helath,<br>Strik, Jacqueline; Maastricht University Medical Centre, Psychiatry and Medical Psychology<br>Lousberg, Richel; Maastricht University Medical Centre, Psychiatry and Medical Psychology<br>Smit, Jasper; IMS Health,<br>van Kleef, Maarten; Maastricht University Medical Centre, Anaesthesiology<br>van Os, Jim; Maastricht University Medical Centre, Psychiatry and Medical Psychology |
| <b>Primary Subject Heading</b>: | General practice / Family practice                                                                                                                                                                                                                                                                                                                                                                                                                                                                                               |
| Secondary Subject Heading:      | Mental health, Health services research, Medical management, Anaesthesia, Pharmacology and therapeutics                                                                                                                                                                                                                                                                                                                                                                                                                          |
| Keywords:                       | Pain management < ANAESTHETICS, MENTAL HEALTH, PAIN MANAGEMENT, PRIMARY CARE, Substance misuse < PSYCHIATRY                                                                                                                                                                                                                                                                                                                                                                                                                      |
|                                 |                                                                                                                                                                                                                                                                                                                                                                                                                                                                                                                                  |

SCHOLARONE™  
Manuscripts

# Please wait...

If this message is not eventually replaced by the proper contents of the document, your PDF viewer may not be able to display this type of document.

You can upgrade to the latest version of Adobe Reader for Windows®, Mac, or Linux® by visiting <http://www.adobe.com/products/acrobat/readstep2.html>.

For more assistance with Adobe Reader visit <http://www.adobe.com/support/products/acrreader.html>.

Windows is either a registered trademark or a trademark of Microsoft Corporation in the United States and/or other countries. Mac is a trademark of Apple Inc., registered in the United States and other countries. Linux is the registered trademark of Linus Torvalds in the U.S. and other countries.

# Please wait...

If this message is not eventually replaced by the proper contents of the document, your PDF viewer may not be able to display this type of document.

You can upgrade to the latest version of Adobe Reader for Windows®, Mac, or Linux® by visiting <http://www.adobe.com/products/acrobat/readstep2.html>.

For more assistance with Adobe Reader visit <http://www.adobe.com/support/products/acrreader.html>.

Windows is either a registered trademark or a trademark of Microsoft Corporation in the United States and/or other countries. Mac is a trademark of Apple Inc., registered in the United States and other countries. Linux is the registered trademark of Linus Torvalds in the U.S. and other countries.

# Please wait...

If this message is not eventually replaced by the proper contents of the document, your PDF viewer may not be able to display this type of document.

You can upgrade to the latest version of Adobe Reader for Windows®, Mac, or Linux® by visiting <http://www.adobe.com/products/acrobat/readstep2.html>.

For more assistance with Adobe Reader visit <http://www.adobe.com/support/products/acrreader.html>.

Windows is either a registered trademark or a trademark of Microsoft Corporation in the United States and/or other countries. Mac is a trademark of Apple Inc., registered in the United States and other countries. Linux is the registered trademark of Linus Torvalds in the U.S. and other countries.

# Please wait...

If this message is not eventually replaced by the proper contents of the document, your PDF viewer may not be able to display this type of document.

You can upgrade to the latest version of Adobe Reader for Windows®, Mac, or Linux® by visiting <http://www.adobe.com/products/acrobat/readstep2.html>.

For more assistance with Adobe Reader visit <http://www.adobe.com/support/products/acrreader.html>.

Windows is either a registered trademark or a trademark of Microsoft Corporation in the United States and/or other countries. Mac is a trademark of Apple Inc., registered in the United States and other countries. Linux is the registered trademark of Linus Torvalds in the U.S. and other countries.



# Please wait...

If this message is not eventually replaced by the proper contents of the document, your PDF viewer may not be able to display this type of document.

You can upgrade to the latest version of Adobe Reader for Windows®, Mac, or Linux® by visiting <http://www.adobe.com/products/acrobat/readstep2.html>.

For more assistance with Adobe Reader visit <http://www.adobe.com/support/products/acrreader.html>.

Windows is either a registered trademark or a trademark of Microsoft Corporation in the United States and/or other countries. Mac is a trademark of Apple Inc., registered in the United States and other countries. Linux is the registered trademark of Linus Torvalds in the U.S. and other countries.

# Please wait...

If this message is not eventually replaced by the proper contents of the document, your PDF viewer may not be able to display this type of document.

You can upgrade to the latest version of Adobe Reader for Windows®, Mac, or Linux® by visiting <http://www.adobe.com/products/acrobat/readstep2.html>.

For more assistance with Adobe Reader visit <http://www.adobe.com/support/products/acrreader.html>.

Windows is either a registered trademark or a trademark of Microsoft Corporation in the United States and/or other countries. Mac is a trademark of Apple Inc., registered in the United States and other countries. Linux is the registered trademark of Linus Torvalds in the U.S. and other countries.

# Please wait...

If this message is not eventually replaced by the proper contents of the document, your PDF viewer may not be able to display this type of document.

You can upgrade to the latest version of Adobe Reader for Windows®, Mac, or Linux® by visiting <http://www.adobe.com/products/acrobat/readstep2.html>.

For more assistance with Adobe Reader visit <http://www.adobe.com/support/products/acrreader.html>.

Windows is either a registered trademark or a trademark of Microsoft Corporation in the United States and/or other countries. Mac is a trademark of Apple Inc., registered in the United States and other countries. Linux is the registered trademark of Linus Torvalds in the U.S. and other countries.

|                              | Item No | Recommendation                                                                                                                                                                                                                                                                                                                                                                                                                                                                                                                |
|------------------------------|---------|-------------------------------------------------------------------------------------------------------------------------------------------------------------------------------------------------------------------------------------------------------------------------------------------------------------------------------------------------------------------------------------------------------------------------------------------------------------------------------------------------------------------------------|
| <b>Title and abstract</b>    | 1       | (a) Indicate the study's design with a commonly used term in the title or the abstract DONE                                                                                                                                                                                                                                                                                                                                                                                                                                   |
|                              |         | (b) Provide in the abstract an informative and balanced summary of what was done and what was found DONE                                                                                                                                                                                                                                                                                                                                                                                                                      |
| <b>Introduction</b>          |         |                                                                                                                                                                                                                                                                                                                                                                                                                                                                                                                               |
| Background/rationale         | 2       | Explain the scientific background and rationale for the investigation being reported DONE                                                                                                                                                                                                                                                                                                                                                                                                                                     |
| Objectives                   | 3       | State specific objectives, including any prespecified hypotheses DONE                                                                                                                                                                                                                                                                                                                                                                                                                                                         |
| <b>Methods</b>               |         |                                                                                                                                                                                                                                                                                                                                                                                                                                                                                                                               |
| Study design                 | 4       | Present key elements of study design early in the paper DONE                                                                                                                                                                                                                                                                                                                                                                                                                                                                  |
| Setting                      | 5       | Describe the setting, locations, and relevant dates, including periods of recruitment, exposure, follow-up, and data collection DONE                                                                                                                                                                                                                                                                                                                                                                                          |
| Participants                 | 6       | (a) <i>Cohort study</i> —Give the eligibility criteria, and the sources and methods of selection of participants. Describe methods of follow-up DONE<br><i>Case-control study</i> —Give the eligibility criteria, and the sources and methods of case ascertainment and control selection. Give the rationale for the choice of cases and controls<br><i>Cross-sectional study</i> —Give the eligibility criteria, and the sources and methods of selection of participants                                                   |
|                              |         | (b) <i>Cohort study</i> —For matched studies, give matching criteria and number of exposed and unexposed<br><i>Case-control study</i> —For matched studies, give matching criteria and the number of controls per case                                                                                                                                                                                                                                                                                                        |
| Variables                    | 7       | Clearly define all outcomes, exposures, predictors, potential confounders, and effect modifiers. Give diagnostic criteria, if applicable DONE                                                                                                                                                                                                                                                                                                                                                                                 |
| Data sources/<br>measurement | 8*      | For each variable of interest, give sources of data and details of methods of assessment (measurement). Describe comparability of assessment methods if there is more than one group DONE                                                                                                                                                                                                                                                                                                                                     |
| Bias                         | 9       | Describe any efforts to address potential sources of bias DONE                                                                                                                                                                                                                                                                                                                                                                                                                                                                |
| Study size                   | 10      | Explain how the study size was arrived at DONE                                                                                                                                                                                                                                                                                                                                                                                                                                                                                |
| Quantitative variables       | 11      | Explain how quantitative variables were handled in the analyses. If applicable, describe which groupings were chosen and why DONE                                                                                                                                                                                                                                                                                                                                                                                             |
| Statistical methods          | 12      | (a) Describe all statistical methods, including those used to control for confounding DONE<br>(b) Describe any methods used to examine subgroups and interactions<br>(c) Explain how missing data were addressed<br>(d) <i>Cohort study</i> —If applicable, explain how loss to follow-up was addressed<br><i>Case-control study</i> —If applicable, explain how matching of cases and controls was addressed<br><i>Cross-sectional study</i> —If applicable, describe analytical methods taking account of sampling strategy |
|                              |         | (e) Describe any sensitivity analyses                                                                                                                                                                                                                                                                                                                                                                                                                                                                                         |

**Results**

|                  |     |                                                                                                                                                                                                                                                                                                                                                                                                                         |
|------------------|-----|-------------------------------------------------------------------------------------------------------------------------------------------------------------------------------------------------------------------------------------------------------------------------------------------------------------------------------------------------------------------------------------------------------------------------|
| Participants     | 13* | (a) Report numbers of individuals at each stage of study—eg numbers potentially eligible, examined for eligibility, confirmed eligible, included in the study, completing follow-up, and analysed DONE<br>(b) Give reasons for non-participation at each stage<br>(c) Consider use of a flow diagram DONE                                                                                                               |
| Descriptive data | 14* | (a) Give characteristics of study participants (eg demographic, clinical, social) and information on exposures and potential confounders DONE<br>(b) Indicate number of participants with missing data for each variable of interest<br>(c) <i>Cohort study</i> —Summarise follow-up time (eg, average and total amount) DONE                                                                                           |
| Outcome data     | 15* | <i>Cohort study</i> —Report numbers of outcome events or summary measures over time DONE<br><i>Case-control study</i> —Report numbers in each exposure category, or summary measures of exposure<br><i>Cross-sectional study</i> —Report numbers of outcome events or summary measures                                                                                                                                  |
| Main results     | 16  | (a) Give unadjusted estimates and, if applicable, confounder-adjusted estimates and their precision (eg, 95% confidence interval). Make clear which confounders were adjusted for and why they were included DONE<br>(b) Report category boundaries when continuous variables were categorized DONE<br>(c) If relevant, consider translating estimates of relative risk into absolute risk for a meaningful time period |
| Other analyses   | 17  | Report other analyses done—eg analyses of subgroups and interactions, and sensitivity analyses                                                                                                                                                                                                                                                                                                                          |

**Discussion**

|                  |    |                                                                                                                                                                                 |
|------------------|----|---------------------------------------------------------------------------------------------------------------------------------------------------------------------------------|
| Key results      | 18 | Summarise key results with reference to study objectives DONE                                                                                                                   |
| Limitations      | 19 | Discuss limitations of the study, taking into account sources of potential bias or imprecision. Discuss both direction and magnitude of any potential bias DONE                 |
| Interpretation   | 20 | Give a cautious overall interpretation of results considering objectives, limitations, multiplicity of analyses, results from similar studies, and other relevant evidence DONE |
| Generalisability | 21 | Discuss the generalisability (external validity) of the study results DONE                                                                                                      |

**Other information**

|         |    |                                                                                                                                                                    |
|---------|----|--------------------------------------------------------------------------------------------------------------------------------------------------------------------|
| Funding | 22 | Give the source of funding and the role of the funders for the present study and, if applicable, for the original study on which the present article is based DONE |
|---------|----|--------------------------------------------------------------------------------------------------------------------------------------------------------------------|

1  
2  
3  
4  
5  
6  
7  
8  
9  
10  
11  
12  
13  
14  
15  
16  
17  
18  
19  
20  
21  
22  
23  
24  
25  
26  
27  
28  
29  
30  
31  
32  
33  
34  
35  
36  
37  
38  
39  
40  
41  
42  
43  
44  
45  
46  
47  
48  
49  
50  
51  
52  
53  
54  
55  
56  
57  
58  
59  
60

|                            |  | Time (months)               |   |   |   |   |   |                    |             |   |    |         |         |
|----------------------------|--|-----------------------------|---|---|---|---|---|--------------------|-------------|---|----|---------|---------|
|                            |  | period prior to observation |   |   |   |   |   | observation period |             |   |    |         |         |
|                            |  | 1                           | 2 | 3 | 4 | 5 | 6 | 7                  | 8           | 9 | 10 | 11      | 12      |
| <b>starting patients</b>   |  | no Rx for analgesics        |   |   |   |   |   | first Rx           | Rx - Rx ... |   |    |         | last Rx |
| <b>continuing patients</b> |  | first Rx                    |   |   |   |   |   | Rx - Rx - Rx ...   |             |   |    | last Rx |         |

For peer review only

1  
2  
3  
4  
5  
6  
7  
8  
9  
10  
11  
12  
13  
14  
15  
16  
17  
18  
19  
20  
21  
22  
23  
24  
25  
26  
27  
28  
29  
30  
31  
32  
33  
34  
35  
36  
37  
38  
39  
40  
41  
42  
43  
44  
45  
46  
47  
48  
49  
50  
51  
52  
53  
54  
55  
56  
57  
58  
59  
60

For peer review only



1  
2  
3  
4  
5  
6  
7 **Original article**

8  
9 **Observational evidence that urbanisation and neighbourhood deprivation are**  
10 **associated with escalation in chronic pharmacological pain treatment - a longitudinal**  
11 **population-based study in the Netherlands**  
12  
13

14  
15 Carsten Leue, consultant\*<sup>1</sup>, Servaas Buijs, statistician<sup>2</sup>, Jacqueline Strik, consultant<sup>1</sup>, Richel  
16 Lousberg, lecturer<sup>1</sup>, Jasper Smit, statistician<sup>2</sup>, Maarten van Kleef, professor<sup>3</sup>, Jim van Os,  
17 professor<sup>1,4</sup>  
18  
19  
20  
21

22  
23  
24 <sup>1</sup>Department of Psychiatry and Psychology, South Limburg Mental Health Research and  
25 Teaching Network, EURON, Maastricht University Medical Centre, Maastricht, The  
26 Netherlands.  
27  
28

29  
30  
31 <sup>2</sup>IMS Health BV, Capelle aan den IJssel, The Netherlands.  
32  
33

34 <sup>3</sup>Department of Anaesthesiology, Maastricht University Medical Centre, Maastricht, The  
35 Netherlands.  
36  
37

38  
39 <sup>4</sup>King's College London, King's Health Partners, Department of Psychosis Studies, Institute of  
40 Psychiatry, London, United Kingdom.  
41  
42  
43  
44

45  
46 \*Correspondence:  
47

48  
49 C. Leue, Department of Psychiatry and Medical Psychology, Maastricht University Medical  
50 Centre, PO BOX 616 (DRT 10), NL 6200 MD Maastricht, The Netherlands. Tel: ++31-43-  
51 3877444. Fax: ++31-43-3875444. E-mail: [c.leue@mumc.nl](mailto:c.leue@mumc.nl)  
52  
53  
54



**Abstract:**

*Objective:* To examine, [in the light of the association between urban environment and poor mental health](#), whether urbanisation and neighbourhood deprivation are associated with analgesic escalation in chronic pharmacological pain treatment, and whether escalation is associated with prescriptions of psychotropic medication.

*Design:* Longitudinal analysis of a population-based routine dispensing database in the Netherlands.

*Setting:* Representative sample of pharmacies, covering 73% of the Dutch nationwide medication consumption in the primary care and hospital outpatient settings.

*Participants:* 449,410 patients aged 15-85 years were included, of whom 166,374 were in the *Starter group* and 283,036 in the *Continuation group* of chronic analgesic treatment.

*Main outcome measure:* Escalation of analgesics (i.e. change to a higher level of analgesic potency, classified [across](#) five levels) in association with urbanisation (five levels) and dichotomous neighbourhood deprivation analysed over a six-month observation period.

*Methods:* Ordered logistic multivariate model evaluating analgesic treatment.

*Results:* In both *Starter* and *Continuation* groups, escalation was positively associated with urbanisation in a dose-response fashion (*Starter group*: OR (urbanisation level 1 compared to level 5): 1.24; 95% CI 1.18 to 1.30; *Continuation group*: OR 1.19; 95% CI 1.14 to 1.23). [An additional](#) association was apparent with neighbourhood deprivation (*Starter group*: OR 1.06; 95% CI 1.02 to 1.11; *Continuation group*: OR 1.04; 95% CI 1.01 to 1.08). Use of somatic and particularly psychotropic co-medication was associated with escalation in both groups.

1  
2  
3  
4  
5  
6  
7 *Conclusion:* Escalation of chronic analgesic treatment is associated with urban and deprived  
8 environments, and occurs in a context of adding psychotropic medication prescriptions.  
9  
10 These findings suggest that pain outcomes and mental health outcomes share factors that  
11 increase risk and remedy suffering.  
12  
13  
14  
15  
16  
17  
18  
19  
20  
21  
22  
23  
24  
25  
26  
27  
28  
29  
30  
31  
32  
33  
34  
35  
36  
37  
38  
39  
40  
41  
42  
43  
44  
45  
46  
47  
48  
49  
50  
51  
52  
53  
54  
55  
56  
57  
58  
59  
60

## Introduction

The validity of the well-known epidemiological association between urban environment and mental health<sup>1-3</sup> is supported by work showing that urban living is associated with increased amygdala activity<sup>4</sup>, a key region in the regulation of stress, affective experience and pain<sup>5,6</sup>. Pain is the natural comorbid mental experience of somatic conditions<sup>7,8</sup>. In turn, pain is strongly influenced by comorbid common mental disorders particularly affective disorders<sup>9,10</sup>. Given evidence of urban impact on risk for common mental disorders<sup>11</sup>, including psychiatric medication prescriptions<sup>12</sup>, we hypothesized that pain outcomes, indexed through prescriptions, would be poorer in urban environments and disadvantaged urban neighbourhoods. Pain outcomes were examined at the level of primary care and specialist outpatient care and defined in two ways: (i) escalation of analgesic treatment (i.e. prescription of more potent analgesics) and (ii) co-prescription of psychotropic medication in addition to analgesic treatment.

## Objective

We examined the hypothesis that chronic pharmacological pain treatment of hospital outpatients and patients in primary care would show escalation of analgesics in association with the level of urbanisation and neighbourhood index of deprivation. It was predicted that the highest levels of urbanisation and neighbourhood deprivation would be associated with escalation of analgesic treatment to more potent pain medication (e.g. tramadol, morphine, methadone, etc.). Furthermore, we examined the hypothesis that prescriptions of psychotropic medication (e.g. antidepressants, antipsychotics, mood stabilizers, etc.) would

1  
2  
3  
4  
5  
6  
7 be associated with escalation or de-escalation of analgesics in patients prescribed chronic  
8 analgesic treatment. Study hypotheses were specified before inspection of the data.  
9

## 10 11 12 13 14 **Method**

### 15 16 *Data collection*

17  
18  
19 The investigation was carried out by analysing records pertaining to Dutch routine general  
20 practice and hospital outpatient treatment settings. Data were obtained from the IMS  
21 Health's longitudinal prescription database (Lifelink, affiliate Capelle ad IJssel, The  
22 Netherlands)<sup>13</sup>. This data source consists of anonymous longitudinal prescription records  
23 from a representative sample of pharmacies and dispensing GPs, covering 73% of the Dutch  
24 nationwide medication consumption of outpatients and primary care patients. The  
25 computerized *medication-dispensing histories* contain data regarding dispensed  
26 medications, type of prescriber, dispensing date, dispensed amount of medication,  
27 prescribed dosage, and length of prescription. Data for each patient were anonymously and  
28 independently sampled without linkage of prescriptions to the same patient across  
29 pharmacies, because patients in the Netherlands are usually loyal to a single pharmacy<sup>14</sup>.  
30 Furthermore, research from the Dutch Foundation for Pharmaceutical Statistics (SFK)  
31 revealed that in the Netherlands, almost all patients make use of a pharmacy located in their  
32 area of living. Eighty-two percent of patients are living in a radius of 3 kilometres from their  
33 pharmacy<sup>15</sup>. Potential bias caused by patients getting hospitalized, moving to another  
34 address or dying was minimized by studying chronic pharmacological pain treatment,  
35 because there were dispensing records for these patients during the whole study period.  
36  
37  
38  
39  
40  
41  
42  
43  
44  
45  
46  
47  
48  
49  
50  
51  
52  
53  
54  
55  
56  
57  
58  
59  
60

1  
2  
3  
4  
5  
6  
7 *Patient groups*

8  
9 Patient selection started with the identification of chronic users of analgesic medication  
10 during a six-month prescription period (hereafter: observation period). Chronic use was  
11 defined as in receipt of analgesic pharmacotherapy during at least two distinct moments  
12 covering an interval of at least two months. In order to track medication for other  
13 therapeutic indications (i.e. psychotropic medication and pharmaco-treatment for somatic  
14 disorders), patients were observed for a period of six months prior to initiation of analgesic  
15 treatment. Next, the cohort with chronic use of analgesics was divided into two groups.  
16  
17 *Starters* were defined as patients who had not received any analgesics during the six-month  
18 period prior to the observation period (hereafter: *Starter group*). Patients who *continued*  
19 with pain medication that was already prescribed in the six month before the observation  
20 period formed the second group (hereafter: *Continuation group*). The latter group consisted  
21 of all patients who had already received analgesics in the first month of the six-month period  
22 prior to the observation period, in order to define chronic analgesic treatment before  
23 observation. All data captured a calendar period from May 2008 to September 2009 (Figure  
24 1).

25  
26  
27  
28  
29  
30  
31  
32  
33  
34  
35  
36  
37  
38  
39  
40  
41 **Figure 1: Starter group and Continuation group of chronic analgesic treatment**

42  
43  
44  
45 Insert Figure 1

46  
47  
48  
49  
50 Legend: Schedule of prescriptions (Rx) in Starter group (top) and Continuation group (bottom) of  
51 chronic analgesic treatment covering a 12 month period. Months 7 to 12 are the observation period;  
52 months 1 to 6 are the pre-observation period. Patients in the Continuation group received first  
53 prescription of analgesics in month 1 of the pre-observation period; there was no follow-up whether  
54 analgesics were continued over the entire six-month interval prior to the observation period. The  
55

1  
2  
3  
4  
5  
6  
7 Starter group did not use any analgesics during the six month interval prior to the observation  
8 period.  
9

10  
11 Data were obtained from the LRx database from month one to twelve as depicted in  
12 Figure 1.. Use of other medications (e.g. psychotropic medication and medication for a broad  
13 spectrum of somatic conditions) was collected for all patients as well, covering the period of  
14 twelve months, consisting of (i) the pre-observation period (month one to six) and (ii) the  
15 observation period (month seven to twelve).  
16  
17  
18  
19  
20  
21

#### 22 23 24 25 *Escalation of pharmacological pain treatment* 26

27  
28 All individual prescriptions of analgesics were observed for each patient in both the Starter  
29 and Continuation groups during the observation period and during the six months prior to  
30 the observation period. At each dispensing date, analgesics were classified *a priori* in five  
31 levels, in order of analgesic potency (Figure 2). Five escalation levels were provided, based  
32 on a minor adaptation of the 3-step WHO-analgesic ladder<sup>16</sup>. Level 5 and 4 are identical to  
33 WHO steps 3 (strong opioids) and 2 (weak opioids), respectively. WHO step 1 (non-opioid  
34 analgesics) was refined, in order to enable further and clinically relevant differentiation  
35 between non-opioid analgesics (level 1: paracetamol, level 2: prostaglandin inhibitors, level  
36 3: anticonvulsants)<sup>16-20</sup>. Furthermore, anti-epileptics were divided in anticonvulsants  
37 predominantly prescribed in pain conditions (level 3a: gabapentin and pregabalin) and  
38 anticonvulsants with best evidence for epilepsy treatment (level 3b: carbamazepine, valproic  
39 acid, lamotrigine)<sup>19-21</sup>. In order to avoid prescription for indications of mood stabilisation or  
40  
41  
42  
43  
44  
45  
46  
47  
48  
49  
50  
51  
52  
53  
54  
55  
56  
57  
58  
59  
60

1  
2  
3  
4  
5  
6  
7 epilepsy, the latter group was classified at level 3b only if prescribed in combination with  
8  
9 analgesic medication at level 1 or 2 (i.e. pain indication) (Figure 2).

10  
11 **Figure 2: 5 levels of analgesic potency, modified from the WHO-analgesic ladder<sup>16</sup>**  
12  
13

14  
15  
16 Insert Figure 2  
17  
18  
19

20 Legend:

- 21 Level 1 (i.e. lowest potency) to level 5 (i.e. highest potency)  
22 (a) Gabapentine, pregabalin in the absence of other anti-epileptic drugs  
23 (b) Carbamazepine, valproic acid, lamotrigine in combination with medication at level 1 or 2  
24 (c) Tramadol, codeine  
25 (d) Methadone, oxycodone, hydromorphone, morphine, buprenorphine, fentanyl, sufentanil,  
26 pethidine  
27  
28

29 Confirmation of escalation was based on the comparison of analgesic potency at the first  
30 dispensing day and the last dispensing day within the observation period.  
31  
32

33  
34 The comparison of first and last prescription of analgesics resulted in the following  
35 categories of analgesic escalation: neutral (i.e. no change of analgesic potency), escalation in  
36 analgesic treatment (i.e. change to a higher level of analgesic potency), or de-escalation in  
37 pharmacological pain treatment (i.e. change to a lower analgesic potency) (Table 1).  
38  
39  
40  
41

42  
43 If patients received several analgesics on the same day, both the highest and the  
44 second highest level of analgesic potency were included in the analyses, in order to define  
45 escalation categories (e.g. a change from level 5 plus level 2 to level 5 plus level 3 indicating  
46 that escalation had occurred).  
47  
48  
49  
50  
51  
52  
53  
54  
55

### *Determinants of escalation in analgesic treatment*

Three groups of variables hypothesized to act as mediators or confounders were included in the analyses. The first group were patient characteristics such as sex (0=men, 1=women), age (in years) and the location of patient's pharmacy (defined by postal code). The latter variable defined the level of urbanisation following the definition of the Dutch Central Bureau of Statistics (CBS). [Conform previous work, and in line with the classification developed by CBS, level of urbanisation was defined by CBS as the number of addresses relative to area surface<sup>22</sup>](#). Level 1 (i.e. highest level of urbanisation) consists of more than 2500 addresses per square-kilometre (km<sup>2</sup>); [level 2 = 1500 to 2500 addresses/km<sup>2</sup>, level 3 = 1000 to 1500 addresses/km<sup>2</sup>, level 4 = 500 to 1000 addresses/km<sup>2</sup>]. Level 5 (i.e. rural environment) consists of less than 500 addresses/km<sup>2</sup>; described in more detail elsewhere<sup>23</sup>. More over, neighbourhood deprivation was defined dichotomously (0=no, 1=yes). The dichotomous measure of neighbourhood deprivation was developed by the Netherlands Institute of Research in Healthcare (NIVEL), using socio-economic indicators such as unemployment rate, average income, population density and ethnic variation. On the basis of empirical research in the Netherlands, NIVEL 's neighbourhood deprivation index (NDI) is calculated as follows:  $NDI = ((\ln \text{percentage unemployed people} - 3.0236)/0.37706) - ((\ln \text{average income} - 2.8641)/0.14441) + ((\ln \text{population density} - 7.0132)/1.06699) + ((\ln \text{percentage people of "non-western" ethnicity})/1.11147)$ . NDIs were expressed continuously by NIVEL from low to high. Furthermore, NIVEL defined a dichotomous measure of deprivation at a cut-off of 5.5% (i.e. 885,000 people), in order to assess trends in the proportion of the Dutch population inhabiting an area with the highest NDI and for use in epidemiological research<sup>24</sup>. Healthcare professionals receive higher levels of funding for their services in these deprived areas<sup>25</sup>. Neighbourhood deprivation was associated with



level of urbanisation: 86% of the sample living in deprived neighbourhoods lived in an area with the highest level of urbanisation. The other patients (14%) living in deprived neighbourhoods lived in an area with the second highest level of urbanisation. The majority (76%) of those living in an area of the highest level of urbanisation did not live in a deprived neighbourhood (Table 1).

**Table 1: Sample, stratified by Urbanisation and Neighbourhood Deprivation**

| Type of patient    | Urbanisation level | Deprived Neighbourhood |        |            |         | % within Deprived Neighbourh. |
|--------------------|--------------------|------------------------|--------|------------|---------|-------------------------------|
|                    |                    | No (patients)          | No (%) | Yes (pat.) | Yes (%) |                               |
| Starter Group      | 1                  | 34662                  | 76.3%  | 10796      | 23.7%   | 86.5%                         |
|                    | 2                  | 48673                  | 96.6%  | 1689       | 3.4%    | 13.5%                         |
|                    | 3                  | 31107                  | 100.0% | 0          | 0.0%    | -                             |
|                    | 4                  | 28283                  | 100.0% | 0          | 0.0%    | -                             |
|                    | 5                  | 11164                  | 100.0% | 0          | 0.0%    | -                             |
|                    | total              | 153889                 | 92.5%  | 12485      | 7.5%    | 100.0%                        |
| Continuation Group | 1                  | 59714                  | 76.2%  | 18644      | 23.8%   | 85.5%                         |
|                    | 2                  | 81406                  | 96.3%  | 3155       | 3.7%    | 14.5%                         |
|                    | 3                  | 50853                  | 100.0% | 0          | 0%      | -                             |
|                    | 4                  | 48511                  | 100.0% | 0          | 0%      | -                             |
|                    | 5                  | 20754                  | 100.0% | 0          | 0%      | -                             |
|                    | total              | 261237                 | 92.3%  | 21799      | 7.7%    | 100.0%                        |
| Total Patients     |                    | 415126                 | 92.4%  | 34284      | 7.6%    |                               |

Legend: The sample is described in absolute numbers for the Starter and the Continuation group, stratified by living in an urbanised area (level 1 to 5), and a dichotomous measure of neighbourhood deprivation. Furthermore, in the last column, tabulation is presented for living in a deprived neighbourhood as a function of level of urbanisation (e.g. in the Starter group, 86.5% of the sample living in deprived neighbourhoods lived in an area with urbanisation level 1).

Furthermore, psychotropic co-medication was classified into its different classes, and somatic co-medication was similarly grouped in 10 classes (ACE inhibitors, angiotensine II

1  
2  
3  
4  
5  
6  
7 inhibitors; antidiabetics; beta-blockers; calcium antagonists; functional bowel drugs;  
8  
9 laxatives; migraine medication; respiratory medication; steroid-antiphlogistics; stomach  
10 protectors) (Table 1 to 3). In the Starting group, occurrence of co-medication was time-  
11 coded at three levels according to the day of first occurrence (i.e. co-medication prescription  
12 before start with analgesics, at the same day or after start of analgesic treatment) (Table 3).  
13  
14 In the Continuation group, occurrence of co-medication was recorded dichotomously  
15 (presence/absence), since it was impossible to distinguish occurrence of co-medication as  
16 before or at start of analgesic treatment (Table 4).  
17  
18  
19  
20  
21  
22  
23  
24  
25

### 26 *Statistical analysis*

27  
28  
29 First, we analysed the pattern of (de-) escalation in analgesic treatment by means of an  
30 ordered logistic multivariable regression model with adjusted odds ratios (and 95%  
31 confidence interval) using SAS version 9<sup>26</sup>. Statistical significance for the model was defined  
32 at conventional alpha of 0.05. The dependent variable in this model was the development of  
33 a patient's analgesic treatment (de-escalation, neutral, escalation). Independent variables,  
34 entered simultaneously in the model, were demographic characteristics, neighbourhood  
35 deprivation, and urbanisation, use of psychotropic medication and use of somatic  
36 medication. In the Starter group, we also included first occurrence of co-medication. The  
37 modeling strategy was to build, first, a fully saturated model (including all variables), in order  
38 to avoid missing relevant information by leaving out non-significant variables. Second,  
39 backward elimination was carried out to find the best model fit.  
40  
41  
42  
43  
44  
45  
46  
47  
48  
49  
50

51  
52 Models for Starter and Continuation groups were run separately, given different sample  
53 selection criteria. The ordered logistic multivariable regression model was chosen above the  
54  
55

1  
2  
3  
4  
5  
6  
7 multinomial model, as the latter does not consider the natural order in our data regarding  
8 development of chronic pain treatment, ranging from de-escalation to neutral to escalation.  
9 Proportional odds were assumed in the models of escalation and de-escalation of analgesic  
10 treatment, and analyses inspected for violation of this assumption. Test on the proportional  
11 odds assumption showed significance, which gave us the confidence to use the ordered  
12 logistic model. If a determinant was positively associated with escalation of analgesics,  
13 absence of this variable was associated negatively with escalation or positively with de-  
14 escalation in analgesic treatment (and vice versa). This offered advantage compared to  
15 separate models for escalation and de-escalation (such as consistency of model estimates)  
16 and avoided double use of patients with a neutral development of analgesic treatment.  
17  
18  
19  
20  
21  
22  
23  
24  
25  
26  
27  
28  
29

### 30 **Results**

31  
32  
33 Overall, 449,410 patients were included, of which 166,374 were in the Starter group and  
34 283,036 in the Continuation group. The baseline characteristics of both groups are shown in  
35 table 2.  
36  
37  
38  
39

#### 40 **Table 2: Baseline characteristics of the patient population with chronic analgesic treatment**

|             |                                           | Starter group     |                           |                |                    | Continuation group |              |                |                    |
|-------------|-------------------------------------------|-------------------|---------------------------|----------------|--------------------|--------------------|--------------|----------------|--------------------|
|             |                                           | Deprived Nb.hoods | Urbanicity <sup>1</sup> 1 | Urbanicity 2-5 | Non Depr. Nb.hoods | Deprived Nb.hoods  | Urbanicity 1 | Urbanicity 2-5 | Non Depr. Nb.hoods |
| Patients    | (Absolute)                                | 12485             | 45458                     | 120916         | 153889             | 21799              | 78358        | 204678         | 261237             |
| Change in   | Analgesics <sup>2</sup>                   |                   |                           |                |                    |                    |              |                |                    |
|             | De-escalation                             | 13.3%             | 12.1%                     | 10.4%          | 10.7%              | 13.2%              | 12.5%        | 11.2%          | 11.4%              |
|             | Neutral                                   | 70.1%             | 71.6%                     | 74.5%          | 74.0%              | 70.0%              | 71.4%        | 73.7%          | 73.3%              |
|             | Escalation                                | 16.5%             | 16.3%                     | 15.1%          | 15.3%              | 16.8%              | 16.1%        | 15.1%          | 15.3%              |
| Gender      | Male                                      | 39.8%             | 39.3%                     | 40.3%          | 40.0%              | 36.7%              | 35.2%        | 34.6%          | 34.6%              |
|             | Female                                    | 60.2%             | 60.7%                     | 59.7%          | 60.0%              | 63.3%              | 64.8%        | 65.4%          | 65.4%              |
| Age (years) | 15-25                                     | 6.3%              | 6.1%                      | 6.5%           | 6.4%               | 1.8%               | 1.6%         | 1.8%           | 1.7%               |
|             | 26-40                                     | 23.8%             | 19.2%                     | 16.3%          | 16.6%              | 14.0%              | 10.8%        | 9.7%           | 9.7%               |
|             | 41-65                                     | 50.0%             | 49.6%                     | 50.9%          | 50.6%              | 56.9%              | 53.4%        | 51.8%          | 51.9%              |
|             | 65-85                                     | 19.8%             | 25.2%                     | 26.2%          | 26.4%              | 27.3%              | 34.2%        | 36.7%          | 36.7%              |
| First       | Analgesics                                |                   |                           |                |                    |                    |              |                |                    |
|             | Level 1                                   | 3.2%              | 3.9%                      | 4.0%           | 4.0%               | 3.0%               | 3.8%         | 4.1%           | 4.1%               |
|             | Level 2                                   | 64.8%             | 66.6%                     | 72.6%          | 71.4%              | 47.8%              | 47.1%        | 53.6%          | 52.1%              |
|             | Level 3                                   | 2.2%              | 2.5%                      | 2.6%           | 2.6%               | 6.4%               | 8.1%         | 8.9%           | 8.8%               |
|             | Level 4                                   | 27.4%             | 24.2%                     | 18.3%          | 19.3%              | 36.1%              | 33.9%        | 27.6%          | 28.8%              |
|             | Level 5                                   | 2.4%              | 2.9%                      | 2.6%           | 2.7%               | 6.8%               | 7.2%         | 5.9%           | 6.2%               |
|             | level 4/5                                 | 29.8%             | 27.0%                     | 20.8%          | 21.9%              | 42.8%              | 41.1%        | 33.5%          | 35.0%              |
| Last        | Analgesics                                |                   |                           |                |                    |                    |              |                |                    |
|             | Level 1                                   | 3.4%              | 3.9%                      | 4.0%           | 4.0%               | 3.4%               | 4.1%         | 4.3%           | 4.3%               |
|             | Level 2                                   | 61.9%             | 63.0%                     | 68.4%          | 67.4%              | 44.5%              | 44.1%        | 50.1%          | 48.8%              |
|             | Level 3                                   | 3.0%              | 3.3%                      | 3.4%           | 3.4%               | 7.0%               | 8.4%         | 9.2%           | 9.1%               |
|             | Level 4                                   | 27.6%             | 24.6%                     | 18.9%          | 19.9%              | 36.8%              | 34.5%        | 28.4%          | 29.6%              |
|             | Level 5                                   | 4.1%              | 5.2%                      | 5.3%           | 5.3%               | 8.3%               | 9.0%         | 7.9%           | 8.2%               |
|             | Level 4/5                                 | 31.7%             | 29.8%                     | 24.2%          | 25.2%              | 45.1%              | 43.4%        | 36.3%          | 37.7%              |
| Concomitant | Medication <sup>3</sup>                   |                   |                           |                |                    |                    |              |                |                    |
|             | Any concomitant medication                | 78.8%             | 79.0%                     | 77.3%          | 77.7%              | 89.3%              | 89.6%        | 88.0%          | 88.4%              |
|             | Migraine medication                       | 3.9%              | 3.6%                      | 3.8%           | 3.7%               | 5.9%               | 5.2%         | 5.1%           | 5.1%               |
|             | Any psychotropic medication               | 35.1%             | 36.6%                     | 34.8%          | 35.3%              | 51.6%              | 53.2%        | 50.2%          | 51.0%              |
|             | Sedatives                                 | 27.0%             | 29.0%                     | 27.4%          | 27.9%              | 41.5%              | 43.4%        | 40.6%          | 41.4%              |
|             | Mood stabilizers                          | 0.2%              | 0.3%                      | 0.2%           | 0.3%               | 0.3%               | 0.4%         | 0.4%           | 0.4%               |
|             | Antipsychotics total                      | 4.1%              | 3.9%                      | 3.1%           | 3.2%               | 6.7%               | 6.1%         | 4.9%           | 5.1%               |
|             | Antipsychotics 2 <sup>nd</sup> generation | 2.4%              | 2.2%                      | 1.5%           | 1.6%               | 4.1%               | 3.5%         | 2.5%           | 2.7%               |
|             | Antipsychotics classic                    | 2.0%              | 2.1%                      | 1.8%           | 1.8%               | 3.2%               | 3.2%         | 2.7%           | 2.8%               |
|             | Bupropion                                 | 0.1%              | 0.1%                      | 0.1%           | 0.1%               | 0.2%               | 0.2%         | 0.1%           | 0.1%               |
|             | MAO inhibitors                            | 0.0%              | 0.0%                      | 0.1%           | 0.0%               | 0.1%               | 0.1%         | 0.1%           | 0.1%               |
|             | TCA                                       | 5.2%              | 5.0%                      | 5.0%           | 5.0%               | 9.5%               | 9.4%         | 9.6%           | 9.6%               |
|             | Other antidepressants <sup>4</sup>        | 2.4%              | 2.0%                      | 1.6%           | 1.7%               | 4.0%               | 3.3%         | 2.7%           | 2.8%               |
|             | SNRI                                      | 2.6%              | 2.4%                      | 2.2%           | 2.2%               | 4.5%               | 4.0%         | 3.5%           | 3.6%               |
|             | SSRI                                      | 7.5%              | 7.0%                      | 6.4%           | 6.5%               | 10.3%              | 10.0%        | 9.0%           | 9.2%               |
|             | Psycho-stimulants                         | 0.4%              | 0.5%                      | 0.5%           | 0.5%               | 0.3%               | 0.5%         | 0.4%           | 0.5%               |
|             | Any somatic medication                    | 72.3%             | 72.6%                     | 71.0%          | 71.4%              | 83.0%              | 82.9%        | 81.7%          | 81.9%              |
|             | Cardiovascular medication <sup>5</sup>    | 30.9%             | 31.4%                     | 30.8%          | 30.9%              | 35.2%              | 34.9%        | 34.9%          | 34.9%              |
|             | Other Somatic medication <sup>6</sup>     | 65.2%             | 65.5%                     | 64.0%          | 64.3%              | 76.9%              | 76.7%        | 75.4%          | 75.6%              |

1  
2  
3  
4  
5  
6  
7 Legend: Patient characteristics are presented as percentages (e.g. age, gender, level of analgesic  
8 treatment, change in analgesic treatment (e.g. escalation, de-escalation, and neutral development of  
9 prescriptions), and concomitant medication). Absolute patient numbers are presented for the Starter  
10 and the Continuation group of chronic analgesic treatment concerning level of urbanicity and for  
11 neighbourhood deprivation.

12 (1) Urbanicity = Urbanisation (level 1 = highest level of urbanisation; level 5 = rural environment)

13 ~~(1)~~(2) Change in pain medication from first to last prescription (neutral = no change in level of  
14 potency, escalation = change to a higher level of analgesic potency, de-escalation = change to  
15 lower analgesic potency)

16  
17 ~~(1)~~(3) Concomitant drug use, observed during a period of 12 month

18 (4) Other than Bupropion, MAO inhibitors, SNRI, SSRI, and TCA

19  
20 (5) Cardiovascular medication: beta-blocker, calcium antagonist, ACE inhibitor, angiotensine II  
21 inhibitor

22  
23 (6) Gastro-intestinal medication: anti-diabetics, steroid-antiphogistics, respiratory medication  
24  
25  
26

27 About 7.6% of all escalating patients were residing in a deprived neighbourhood, and  
28 approximately 27.6% were living in an area of the highest level of urbanisation (level 1)  
29 (Table 2). The majority were female, and there were more patients showing escalation  
30 (15.4%) than de-escalation (11.3%) of analgesic treatment. The majority of patients  
31 continued a neutral analgesic treatment regime (73.3%) (Table 2). Most of the patients were  
32 treated at level 2 or level 4 of analgesic potency. Almost all patients were using other  
33 medications, regardless of the different categories in table 2 (84.5%). Around half were using  
34 psychotropic medication (45.2%), most were using somatic co-medication (78.1%), and more  
35 than a third were using both (38.8%) (Table 2).  
36  
37  
38  
39  
40  
41  
42  
43  
44

45  
46 The Starter group mainly initiated an analgesic at level 2 (70.9%) and level 4 (19.9%),  
47 whereas only 2.6% directly initiated at level 5. However, analgesic potency level 4 and 5  
48 increased up to 20.5% respectively 5.2% by the time of the last prescription in the Starter  
49 group (Table 2).  
50  
51  
52  
53  
54  
55

1  
2  
3  
4  
5  
6  
7 In the Continuation group, patients already received analgesics at a higher level of  
8  
9 potency at inclusion compared to the last observed level of medication potency in the  
10  
11 Starter group. Level 4 and 5 was observed in 35.6% at the start of the observation period,  
12  
13 increasing to 38.3% at the end of observation period (Table 2).  
14

15  
16 Escalation of analgesic treatment was observed more often in deprived  
17  
18 neighbourhoods and in areas of the highest levels of urbanisation (16.8% and 16.1% in the  
19  
20 Continuation group, respectively 16.5% and 16.3% in the Starter group) compared to rural  
21  
22 areas (15.1%) and non-deprived neighbourhoods (15.3%) (Table 2). The proportion of  
23  
24 patients with neutral development of analgesic treatment was lower in deprived  
25  
26 neighbourhoods and areas with the highest degree of urbanisation compared to less densely  
27  
28 populated areas (Table 2).  
29

30  
31 In the Starter group, escalation was positively associated with lower level of first  
32  
33 observed pain medication (highest adjusted Odds Ratio (OR) 58.23 at analgesic level 1; 95%  
34  
35 Confidence Interval (CI) 53.60 to 63.27; lowest OR 1.36 at analgesic level 4; 95% CI 1.27 to  
36  
37 1.45; compared to reference level 5) (Table 3). Escalation was furthermore associated, in a  
38  
39 dose-response fashion, with level of urbanisation (highest adjusted OR 1.24 at urbanisation  
40  
41 level 1; 95% CI 1.18 to 1.30; compared to reference level 5) (Table 3). Furthermore, a weak  
42  
43 but additional association existed between escalation and neighbourhood deprivation (OR  
44  
45 1.06; 95% CI 1.02 to 1.11) (Table 3). Use of tricyclic antidepressants (TCA), mood stabilizers  
46  
47 (OR 1.36; 95% CI 1.07 to 1.42), sedatives, cardiovascular medication (OR 1.16; 95% CI 1.13 to  
48  
49 1.19) and medications for other somatic conditions was associated with analgesics  
50  
51 escalation, when prescribed *before* start of analgesics (Table 3). Similarly, in the Starter  
52  
53 group, escalation of analgesic treatment was also associated with the use of selective  
54  
55

1  
2  
3  
4  
5  
6  
7  
8  
9  
10  
11  
12  
13  
14  
15  
16  
17  
18  
19  
20  
21  
22  
23  
24  
25  
26  
27  
28  
29  
30  
31  
32  
33  
34  
35  
36  
37  
38  
39  
40  
41  
42  
43  
44  
45  
46  
47  
48  
49  
50  
51  
52  
53  
54  
55  
56  
57  
58  
59  
60

noradrenalin serotonin reuptake inhibitors (SNRI), sedatives (OR 1.82; 95% CI 1.74 to 1.89), TCA (OR 2.19; 95% CI 2.03 to 2.36), and antipsychotics (OR 2.43; 95% CI 2.19 to 2.68) when prescribed *after* start of analgesics (Table 3). Negative associations with escalation (i.e. positive association with de-escalation) were apparent for younger age, female sex, and pharmacological migraine treatment. Furthermore, use of antipsychotics was negatively associated with escalation if started *simultaneously* with analgesic treatment (OR 0.70; 95% CI 0.58 to 0.84) (Table 3).

The use of selective serotonin reuptake inhibitors (SSRI), before, at or after start of analgesic treatment was not associated with escalation of analgesics in the Starter group (Table 3).

In the Starter group, the original fully saturated model and the model after backward elimination revealed the same variables associated significantly with escalation in chronic pharmacological pain treatment (Table 3).

**Table 3: Associations with escalation in pharmacological pain treatment for the Starter group of chronic analgesic treatment**

| Exposure                  |                                         | Adj. Odds Ratio | 95% CI <sup>1</sup> |       |
|---------------------------|-----------------------------------------|-----------------|---------------------|-------|
|                           |                                         |                 | Lower               | Upper |
| Analgesics <sup>2</sup>   | Level 1                                 | 58.23           | 53.60               | 63.27 |
|                           | Level 2                                 | 17.92           | 16.75               | 19.16 |
|                           | Level 3                                 | 4.66            | 4.23                | 5.14  |
|                           | Level 4                                 | 1.36            | 1.27                | 1.45  |
|                           | Level 5                                 | Reference       | -                   | -     |
| Gender                    | Female                                  | 0.97            | 0.95                | 0.99  |
|                           | Male                                    | Reference       | 0.00                | 0.00  |
| Age (years)               | 15-25                                   | 0.73            | 0.69                | 0.77  |
|                           | 26-40                                   | 0.81            | 0.78                | 0.84  |
|                           | 41-65                                   | 0.87            | 0.85                | 0.90  |
|                           | 66-85                                   | Reference       | -                   | -     |
| Urbanisation <sup>3</sup> | 1                                       | 1.24            | 1.18                | 1.30  |
|                           | 2                                       | 1.16            | 1.11                | 1.22  |
|                           | 3                                       | 1.11            | 1.06                | 1.17  |
|                           | 4                                       | 1.07            | 1.02                | 1.13  |
|                           | 5                                       | Reference       | -                   | -     |
| Deprived                  | Yes                                     | 1.07            | 1.02                | 1.11  |
| Neighbourhood             | No                                      | Reference       | -                   | -     |
| SNRI                      | Before start of analgesics <sup>4</sup> | 1.05            | 0.96                | 1.14  |
|                           | Same start date                         | 1.28            | 0.97                | 1.69  |
|                           | After analgesics started                | 1.26            | 1.09                | 1.45  |
|                           | None                                    | Reference       | -                   | -     |
| SSRI                      | Before start of analgesics              | 0.97            | 0.92                | 1.02  |
|                           | Same start date                         | 0.97            | 0.83                | 1.15  |
|                           | After analgesics started                | 1.07            | 0.97                | 1.18  |
|                           | None                                    | Reference       | -                   | -     |
| TCA                       | Before start of analgesics              | 1.23            | 1.15                | 1.32  |
|                           | Same start date                         | 1.32            | 1.12                | 1.54  |
|                           | After analgesics started                | 2.19            | 2.03                | 2.36  |
|                           | None                                    | Reference       | -                   | -     |
| Other AD                  | Before start of analgesics              | 1.03            | 0.93                | 1.15  |
|                           | Same start date                         | 0.93            | 0.71                | 1.21  |
|                           | After analgesics started                | 1.22            | 1.06                | 1.42  |
|                           | None                                    | Reference       | -                   | -     |
| Antipsychotics            | Before start of analgesics              | 0.92            | 0.85                | 1.01  |
|                           | Same start date                         | 0.69            | 0.58                | 0.83  |
|                           | After analgesics started                | 2.42            | 2.18                | 2.67  |
|                           | None                                    | Reference       | -                   | -     |
| Mood stabilizers          | Before start of analgesics              | 1.40            | 1.10                | 1.79  |
|                           | Same start date                         | 0.91            | 0.43                | 1.89  |
|                           | After analgesics started                | 0.71            | 0.39                | 1.31  |
|                           | None                                    | Reference       | -                   | -     |
| Sedatives                 | Before start of analgesics              | 1.24            | 1.20                | 1.28  |
|                           | Same start date                         | 1.25            | 1.18                | 1.33  |
|                           | After analgesics started                | 1.82            | 1.74                | 1.89  |
|                           | None                                    | Reference       | -                   | -     |
| Cardio-Vascular drugs     | Before start of analgesics              | 1.16            | 1.13                | 1.19  |
|                           | Same start date                         | 0.86            | 0.79                | 0.95  |
|                           | After analgesics started                | 1.35            | 1.26                | 1.45  |
|                           | None                                    | Reference       | -                   | -     |
| Other Somatic drugs       | Before start of analgesics              | 1.25            | 1.22                | 1.29  |
|                           | Same start date                         | 1.11            | 1.07                | 1.15  |
|                           | After analgesics started                | 1.19            | 1.15                | 1.23  |
|                           | None                                    | Reference       | -                   | -     |
| Migraine medication       | Before start of analgesics              | 0.83            | 0.77                | 0.89  |
|                           | Same start date                         | 0.95            | 0.78                | 1.17  |
|                           | After analgesics started                | 0.91            | 0.81                | 1.02  |
|                           | None                                    | Reference       | -                   | -     |



## Legend:

- (1) 95% CI: confidence interval  
 (2) Escalation = change to a higher level of analgesic potency, level 5 = highest level  
 (3) 1 = highest level of urbanisation, 5 = rural environment  
 (4) Starting date of medication (before, at the same day or after start of analgesics)

In the Continuation group, escalation of analgesics was positively associated with lowest levels of first observed analgesics (highest adjusted OR 16.00 at analgesic level 1; 95% CI 15.20 to 16.85; lowest OR 1.55 at analgesic level 4; 95% CI 1.50 to 1.61; compared to reference level 5) (Table 4). Furthermore, escalation was associated with level of urbanisation in a dose response fashion (highest adjusted OR 1.19 at level 1; 95% CI 1.14 to 1.23; compared to reference level 5) (Table 4). There was also an association between escalation and deprived neighbourhoods, use of SSRI, SNRI, TCA, all antipsychotics, and sedatives (OR 1.31; 95% CI 1.29 to 1.33) as well as use of somatic co-medication (OR 1.12; 95% CI 1.10 to 1.14) (Table 4). De-escalation was associated with female sex, younger age, treatment of migraine, and use of second-generation antipsychotics (OR 0.80; 95% CI 0.70 to 0.91) (Table 4).

The saturated model showed that 22 out of 29 variables had significant associations. All these variables remained significant in the backward elimination approach. One additional variable displayed a significant association after backward elimination: 'TCA high dosage'. The OR's did not (16 variables), or only minimally (6 variables) differ between the fully saturated model and the backward elimination model. The only variable showing a degree of difference was 'TCA total' (fully saturated model: OR = 1.19 (CI: 1.06 – 1.32); backward elimination model: OR = 1.33 (CI: 1.29 – 1.36)) (Table 4).

**Table 4: Associations with escalation in pharmacological pain treatment for the Continuation group of chronic analgesic treatment**

| Exposure                   |                            | Adjusted Odds Ratio | 95% CI <sup>1</sup> |       |
|----------------------------|----------------------------|---------------------|---------------------|-------|
|                            |                            |                     | Lower               | Upper |
| Analgesics <sup>2</sup>    | Level 1                    | 16.00               | 15.20               | 16.85 |
|                            | Level 2                    | 7.87                | 7.59                | 8.16  |
|                            | Level 3                    | 3.14                | 3.00                | 3.28  |
|                            | Level 4                    | 1.55                | 1.50                | 1.61  |
|                            | Level 5                    | Reference           | -                   | -     |
| Gender                     | Female                     | 0.96                | 0.94                | 0.98  |
|                            | Male                       | Reference           | -                   | -     |
| Age (years)                | 15-25                      | 0.91                | 0.85                | 0.97  |
|                            | 26-40                      | 0.98                | 0.95                | 1.01  |
|                            | 41-65                      | 0.99                | 0.97                | 1.01  |
|                            | 66-85                      | Reference           | -                   | -     |
| Urbanisation <sup>3</sup>  | 1                          | 1.18                | 1.14                | 1.23  |
|                            | 2                          | 1.14                | 1.10                | 1.17  |
|                            | 3                          | 1.08                | 1.04                | 1.12  |
|                            | 4                          | 1.05                | 1.01                | 1.09  |
|                            | 5                          | Reference           | -                   | -     |
| Deprived Neighbourhood     | Yes                        | 1.04                | 1.01                | 1.08  |
|                            | No                         | Reference           | -                   | -     |
| SNRI                       |                            | 1.19                | 1.02                | 1.40  |
| SSRI                       |                            | 1.03                | 1.004               | 1.07  |
| TCA <sup>4</sup>           |                            | 1.19                | 1.06                | 1.32  |
| Other AD                   |                            | 1.08                | 1.03                | 1.14  |
| Antipsychotics             | Total                      | 1.24                | 1.08                | 1.43  |
|                            | 1 <sup>st</sup> generation | 1.01                | 0.88                | 1.15  |
|                            | 2 <sup>nd</sup> generation | 0.80                | 0.70                | 0.91  |
| Mood stabilizers           |                            | 0.97                | 0.85                | 1.10  |
| Sedatives                  |                            | 1.31                | 1.29                | 1.34  |
| Migraine                   |                            | 0.95                | 0.91                | 0.99  |
| Cardio Vascular Drugs      |                            | 1.12                | 1.10                | 1.14  |
| Other Somatic Drug classes |                            | 1.12                | 1.10                | 1.14  |

Legend:

(1) 95% CI: confidence interval

(2) Escalation = change to a higher level of analgesic potency, level 5 = highest level

(3) 1 = highest level of urbanisation, 5 = rural environment

(4) TCA total (fully saturated model: OR = 1.19 (CI: 1.06 – 1.32); BWE model: OR = 1.33 (CI: 1.29 – 1.36))

Over time, the escalation process continues even after the first 6 months of chronic analgesic treatment. In the Starter group, opioid-analgesics (level 4/5) were dispensed in 29.8% of patients living in a deprived neighbourhood. In contrast, 42.8% of patients in deprived neighbourhoods used opioids in the Continuation group, after one year of prescription. A similar, but attenuated development was seen at urbanisation level 1 and level 2 to 5 (Table 2).

## Discussion

Escalation of chronic analgesic treatment was observed more often in urban areas and deprived neighbourhoods within urban areas, suggesting pain outcomes either are associated with individual characteristics that are more prevalent in urban and deprived areas, or subject to contextual influences, like area-level stress or social fragmentation, regardless of individual level characteristics. One individual level variable that may explain part of the association with urbanicity and deprivation is socio-economic status<sup>27 28</sup>, which was not available for inclusion in the model. Nevertheless, the fact that the association with urbanicity remained with deprivation adjusted for in the same model, suggests that urban effects may not be reducible entirely to individual-level socio-economic status. Furthermore, although neighbourhood deprivation and urbanicity are correlated, additional association of deprivation with escalation of analgesics exists over and above urbanisation, indicating that other parameters than population density are involved too. However, the findings could also be attributed to reverse causation, i.e. patients with worsening pain may move into more urban and deprived neighbourhoods as a consequence of being disabled due to ill health.

Although unlikely to entirely explain the current findings, it cannot be excluded.

Regardless of the underlying mechanism, results clearly echo findings of unconfounded higher rates of poor mental health in areas of higher levels of urbanisation and greater neighbourhood deprivation<sup>11 29</sup>, and suggest that the outcome of mental disorder comorbidity associated with somatic disorders may show similar predictable variation. Functional pain syndromes and psychiatric disorders show high levels of interdependency<sup>30-35</sup>, and psychiatric conditions enhance severity of somatic symptoms<sup>36</sup>. Thus, part of the mechanism underlying the association between pharmacological pain escalation and urban environment may be explained by urbanisation increasing the risk for mental ill health. This

1  
2  
3  
4  
5  
6  
7 hypothesis is supported by the findings, as in both the Starter and the Continuation groups,  
8  
9 escalation of chronic analgesic treatment was associated not only with urban environment  
10  
11 and neighbourhood deprivation, but also with prescription of various psychotropic  
12  
13 medications prescribed in association. In general, the positive association of escalating  
14  
15 analgesic treatment with psychotropic medication was as strong or even stronger than the  
16  
17 association with prescribed somatic co-medication, with the exception of the observed de-  
18  
19 escalating effect, in the Continuation group, of second-generation antipsychotics, which  
20  
21 possess powerful analgesic properties<sup>37 38</sup>. This is accordance with the literature, given the  
22  
23 fact that psychiatric conditions can enhance symptom severity in somatic patients<sup>36</sup>, which  
24  
25 sometimes may impact even more that the somatic condition itself<sup>39</sup>.

26  
27  
28 Although the absolute difference between analgesic escalation in the urban vs. less  
29  
30 urban environment was small, this difference may be relevant from a public health  
31  
32 perspective, given the high rate of painful conditions in the general population.

33  
34 Furthermore, prevention of persistent pain states is relevant with regard to costs<sup>40</sup>. Given  
35  
36 the well known increase of health care costs in complex patients with frequent utilization of  
37  
38 health care, with or with out psychiatric comorbidity, only a small number of patients is  
39  
40 required to cause relevant clinical cost changes<sup>41</sup>. A more effective treatment of persistent  
41  
42 pain, including treatment of psychiatric comorbidity, may have a cost-saving effect.

43  
44 Targeting populations with painful conditions for early recognition and treatment of mental  
45  
46 health problems may not only be cost-effective from a public health perspective, but also  
47  
48 represent an area of considerable unmet clinical need, since opioid escalation is an  
49  
50 inflationary development in the treatment of painful conditions<sup>42 43</sup>. Moreover, broadening  
51  
52 the pain agenda to a better understanding of associated mental health problems could  
53  
54 minimize failed surgery outcomes, for example in patients with undetected mental  
55

1  
2  
3  
4  
5  
6  
7 disorders. For instance, new surgical procedures were found to be more common in chronic  
8  
9 back pain (CBP) patients with Post-traumatic Stress Disorder compared to CBP patients  
10  
11 without<sup>44</sup>. Similarly, depression was demonstrated in 47.4 % of patients with low back pain  
12  
13 who had no surgery, in 50% of those with one surgical procedure, and in 62.5 % of those  
14  
15 who had undergone surgery more than once<sup>45</sup>. Influencing central pain sensitization by  
16  
17 providing adequate antidepressant treatment in depressive conditions may help prevent  
18  
19 surgical escalation.

20  
21 Odds ratios for escalation of analgesics in relation to original level of analgesics may  
22  
23 represent ceiling effects in both starter and continuation groups - patients already at level 5  
24  
25 have nowhere stronger to go; treatment of patients at level 1 at baseline can escalate to  
26  
27 stronger medication. Ceiling effects may reflect the pattern of prescribing analgesics in  
28  
29 general practice. Given these, it has been suggested that the WHO analgesic ladder is in  
30  
31 need of updating<sup>46</sup>. For example, Vargas-Schaffer is broadening the ladder with a 4<sup>th</sup> surgical  
32  
33 step; in the current article, however, we guide attention to treatment aspects related to  
34  
35 underestimated mental disorder comorbidity in persistent pain states.

36  
37  
38 The speculative question remains to what degree escalation of analgesic treatment  
39  
40 and its association with psychotropic medication reflects therapeutic paradigms to remedy  
41  
42 pain, treatment of psychiatric comorbidity, or a cause of psychopathology. For instance, in  
43  
44 the Starter and the Continuation group of chronic analgesic treatment, escalation of  
45  
46 analgesics was consistently and positively associated with the use of TCA. This prescription  
47  
48 habit may reflect routine off-label paradigms in the pharmacological treatment of pain  
49  
50 syndromes<sup>10 47-49</sup>. However, given the evidence regarding TCA's efficacy in pain conditions,  
51  
52 negative rather than positive associations with escalation of analgesics should have been  
53  
54

1  
2  
3  
4  
5  
6  
7 expected. More likely, since the association with TCAs was as strong as the association of  
8  
9 sedatives with analgesic escalation, it may be a reflection of affective or addictive  
10  
11 comorbidity in persistent pain, for example in vulnerable cases of opiate-induced  
12  
13 sensitization, tolerance and hyperalgesia<sup>50-56</sup>. Our data indicate that escalation of analgesics  
14  
15 may represent an ongoing process after even months of treatment, which occurs not  
16  
17 exclusively in the context of environmental deprivation. Since prescriptions of psychotropic  
18  
19 and (attenuated) somatic medication show a similar pattern over time, escalation may also  
20  
21 be driven to a degree by patient factors such as opioid tolerance, opioid-induced  
22  
23 hyperalgesia<sup>53</sup>, or disease progression.

24  
25  
26 Given the literature on this topic<sup>47-51 57</sup>, negative associations of particularly  
27  
28 antidepressants with escalation of chronic analgesic treatment would have been expected.  
29  
30 Nevertheless, negative associations between escalation of chronic analgesic treatment were  
31  
32 also found, for example with migraine treatment (Tables 3 and 4). Moreover, the use of  
33  
34 antipsychotics was negatively associated with analgesic escalation in the Starter group - if  
35  
36 prescribed after start of analgesic treatment. In the Continuation group, de-escalation was  
37  
38 specifically associated with the use of second-generation antipsychotics. This outcome is  
39  
40 interesting and deserves further investigation, given that limited evidence for the efficacy of  
41  
42 antipsychotics in pain conditions already exists<sup>37 38</sup>.

43  
44  
45 The results of the current study should be seen in the light of several limitations. The  
46  
47 use of routine data rather than a targeted data collection could have caused more random  
48  
49 error resulting in type II error. Unidentified confounding may have played a role, as  
50  
51 randomization was not possible and pre-post designs are sensitive to effects of unmeasured  
52  
53 changes affecting outcome measures over time. Another limitation is the lack of outcomes  
54

1  
2  
3  
4  
5  
6  
7  
8  
9  
10  
11  
12  
13  
14  
15  
16  
17  
18  
19  
20  
21  
22  
23  
24  
25  
26  
27  
28  
29  
30  
31  
32  
33  
34  
35  
36  
37  
38  
39  
40  
41  
42  
43  
44  
45  
46  
47  
48  
49  
50  
51  
52  
53  
54  
55  
56  
57  
58  
59  
60

other than urbanisation, psychotropic medication or somatic co-medication. For instance, there were no estimates regarding care consumption or illness-related sick leave. Changes in patient-related outcomes like illness severity, global functioning, quality of life and treatment satisfaction should also form part of prospective evaluations. The type of data used is subject to the possibility of ecological fallacy: people whose pharmacy is in a deprived or urban neighbourhood do not necessarily experience that level of deprivation or urbanicity. Furthermore, this study only collected data over a twelve-month period. Affect and pain monitoring deserves longer evaluation. Finally, due to the study design, associations do not allow for causal inference.

#### WHAT IS ALREADY KNOWN ON THIS TOPIC

Numerous observational studies have observed higher rates of poor mental health in urban and deprived neighbourhood environments.

Pain syndromes and mental disorders show high levels of interdependency, and mental disorders are known to enhance severity of somatic symptoms.

#### WHAT THIS STUDY ADDS

Escalation of chronic analgesic treatment in persistent pain is associated with urban environments and deprived neighbourhoods, and occurs in a context of increased levels of psychotropic medication prescribing, suggesting persistent pain outcomes are associated with area influences affecting mental health.

*Contributors:* CL, SB and JvO were principal investigators of the study. SB analysed the data

1  
2  
3  
4  
5  
6  
7 in collaboration with CL, JvO, and JS. CL and JvO drafted the paper. All authors contributed to  
8  
9 subsequent drafts of the paper, including the final version. JvO is guarantor.

10  
11  
12 *External funding:* Eli Lilly provided funding to IMS Health for data analysis. External funding  
13  
14 did not support any other aspect of the study. All authors contributed independently from  
15  
16 funders to this study; and all authors had full access to and can take responsibility for the  
17  
18 data and analyses.

19  
20  
21 *Competing interests:* All authors have completed the Unified Competing Interest form at  
22  
23 [www.icmje.org/coi\\_disclosure.pdf](http://www.icmje.org/coi_disclosure.pdf) (available on request from the corresponding author) and  
24  
25 declare: no support from any organisation for the submitted work, with the exception of  
26  
27 above-mentioned funding to IMS Health for data analysis; no financial relationships with any  
28  
29 organisation that might have an interest in the submitted work; and no other relationships  
30  
31 or activities that could appear to have influenced the submitted work.

32  
33  
34 *License for publication:* All authors grant an exclusive license (or non exclusive for  
35  
36 government employees) on a worldwide basis to the BMJ Publishing Group LTD and its  
37  
38 licensees, to permit this article (if accepted) to be published in BMJ editions and any other  
39  
40 BMJPG products and to exploit all subsidiary rights, as set out on:  
41  
42 <http://resources.bmj.com/bmj/authors/checklists-forms/license-for-publication>.

43  
44  
45 [Statement on ethical approval: Data were anonymous, reflecting routine general practice. In](#)  
46  
47 [the Netherlands, no ethical commission approval is required for analyses using anonymous](#)  
48  
49 [data acquired in routine practice.](#)  
50



## References

1. Lofors J, Sundquist K. Low-linking social capital as a predictor of mental disorders: a cohort study of 4.5 million Swedes. *Social science & medicine* 2007;64(1):21-34.
2. Thomas H, Weaver N, Patterson J, et al. Mental health and quality of residential environment. *Br J Psychiatry* 2007;191:500-5.
3. Ivory VC CS, Blakely T, Dew K. When does neighbourhood matter? Multilevel relationships between neighbourhood social fragmentation and mental health. *Social science & medicine* 2011;72:1993-2002.
4. Lederbogen F KP, Haddad L, Streit F, et al. City living and urban upbringing affect neural stress processing in humans. *Nature* 2011;474(7352):498-501.
5. Hubbard Cs LJ, Bueller J, Stains J, et al. Corticotropin-releasing factor receptor 1 antagonist alters regional activation and effective connectivity in an emotional-arousal circuit during expectation of abdominal pain. *J Neurosci* 2011;31(35):12491-500.
6. Murrough JW, Huang Y, Hu J, et al. Reduced amygdala serotonin transporter binding in posttraumatic stress disorder. *Biol Psychiatry* 2011(Aug 17):[Epub ahead of print].
7. Smith HS HR, Clauw D. Fibromyalgia: an afferent processing disorder leading to a complex pain generalized syndrome. *Pain Physician* 2011;14(2):E217-45.
8. Price DD CJ, Zhou Q, Verne GN, et al. Widespread hyperalgesia in irritable bowel syndrome is dynamically maintained by tonic visceral impulse input and placebo/nocebo factors: evidence from human psychophysics, animal models and neuroimaging. *Neuroimage* 2009;47(3):995-1001.
9. Wise TN, Fishbain DA, Holder-Perkins V. Painful physical symptoms in depression: a clinical challenge. *Pain medicine* 2007;8 Suppl 2:S75-82.
10. Goldenberg DL. Pain/Depression dyad: a key to a better understanding and treatment of functional somatic syndromes. *The American journal of medicine* 2010;123(8):675-82.
11. Peen J, Schoevers RA, Beekman AT, et al. The current status of urban-rural differences in psychiatric disorders. *Acta Psychiatr Scand* 2010;121(2):84-93.
12. Crump C, Sundquist K, Sundquist J, et al. Neighborhood deprivation and psychiatric medication prescription: a Swedish national multilevel study. *Ann Epidemiol*;21(4):231-7.
13. Netelenbos JC, Geusens PP, Ypma G, et al. Adherence and profile of non-persistence in patients treated for osteoporosis--a large-scale, long-term retrospective study in The Netherlands. *Osteoporos Int*;22(5):1537-46.
14. Buurma H, Bouvy ML, De Smet PA, et al. Prevalence and determinants of pharmacy shopping behaviour. *Journal of clinical pharmacy and therapeutics* 2008;33(1):17-23.
15. <http://www.sfk.nl/nieuws-publicaties/PW/2003/2003-15.htm>.
16. World Health Organization. Traitement de la douleur cancéreuse. Geneva, Switzerland: *World Health Organization*; 1987.
17. Wiffen PJ, Derry S, Moore RA, et al. Carbamazepine for acute and chronic pain in adults. *Cochrane Database Sys Rev* 2011;(1):CD005451.
18. Wiffen PJ, Derry S, Moore RA, et al. Lamotrigine for acute and chronic pain. *Cochrane Database Sys Rev* 2011;(2):CD006044.
19. Moore RA, Wiffen PJ, Derry S, et al. Gabapentin for chronic neuropathic pain and fibromyalgia in adults. *Cochrane Database Sys Rev* 2011;(3):CD007938.

20. Moore RA, Straube S, Wiffen PJ, et al. Pregabalin for acute and chronic pain in adults. *Cochrane Database Sys Rev* 2009;(3):CD007076.
21. Perucca E, Tomson T. The pharmacological treatment of epilepsy in adults. *Lancet Neurol* 2011;10(5):446-56.
22. Van Os J, Hanssen M, Bijl RV, et al. Prevalence of psychotic disorder and community level of psychotic symptoms: an urban-rural comparison. *Arch Gen Psychiatry* 2001;58:663-668.
23. Central Bureau of Statistics. Bevolking der gemeenten van Nederland. *The Hague, The Netherlands: CBS Publications* 1993.
24. Wiegers TA DW. Herijking stedelijke achterstandsgebieden. *Utrecht, The Netherlands: NIVEL publications* 2008.
25. Nza, tariefbeschikking 5000-1900-09-3, 30 juni 2009. <http://www.naz.nl/>.
26. <http://www.sas.com/>.
27. Drukker M, van Os J. Mediators of neighbourhood socioeconomic deprivation and quality of life. *Social psychiatry and psychiatric epidemiology* 2003;38(12):698-706.
28. Skapinakis P, Weich S, Lewis G, et al. Socio-economic position and common mental disorders. Longitudinal study in the general population in the UK. *Br J Psychiatry* 2006;189:109-17.
29. March D, Hatch SL, Morgan C, et al. Psychosis and place. *Epidemiol Rev* 2008;30:84-100.
30. Hotopf M, Mayou R, Wadsworth M, et al. Temporal relationships between physical symptoms and psychiatric disorder. Results from a national birth cohort. *Br J Psychiatry* 1998;173:255-61.
31. Kroenke K, Jackson JL, Chamberlin J. Depressive and anxiety disorders in patients presenting with physical complaints: clinical predictors and outcome. *The American journal of medicine* 1997;103(5):339-47.
32. Barsky AJ, Orav EJ, Bates DW. Somatization increases medical utilization and costs independent of psychiatric and medical comorbidity. *Archives of general psychiatry* 2005;62(8):903-10.
33. Fink P, Hansen MS, Oxhøj ML. The prevalence of somatoform disorders among internal medical inpatients. *Journal of psychosomatic research* 2004;56(4):413-8.
34. Levy RL, Olden KW, Naliboff BD, et al. Psychosocial aspects of the functional gastrointestinal disorders. *Gastroenterology* 2006;130(5):1447-58.
35. Leue C, Driessen G, Strik JJ, et al. Managing complex patients on a medical psychiatric unit: an observational study of university hospital costs associated with medical service use, length of stay, and psychiatric intervention. *Journal of psychosomatic research* 2010;68(3):295-302.
36. Meyer T, Klemme H, Herrmann C. Depression but not anxiety is a significant predictor of physicians' assessments of medical status in physically ill patients. *Psychotherapy and psychosomatics* 2000;69(3):147-54.
37. Freeddenfeld RN, Murray M, Fuchs PN, et al. Decreased pain and improved quality of life in fibromyalgia patients treated with olanzapine, an atypical neuroleptic. *Pain Pract* 2006;6(2):112-8.
38. Seidel S, Aigner M, Ossege M, et al. Antipsychotics for acute and chronic pain in adults. *Cochrane database of systematic reviews* 2008(4):CD004844.

1  
2  
3  
4  
5  
6  
7  
8  
9  
10  
11  
12  
13  
14  
15  
16  
17  
18  
19  
20  
21  
22  
23  
24  
25  
26  
27  
28  
29  
30  
31  
32  
33  
34  
35  
36  
37  
38  
39  
40  
41  
42  
43  
44  
45  
46  
47  
48  
49  
50  
51  
52  
53  
54  
55  
56  
57  
58  
59  
60

39. Kim KW, Han JW, Cho HJ, et al. Association between comorbid depression and osteoarthritis symptom severity in patients with knee osteoarthritis. *J Bone Joint Surg Am* 2011;93(6):556-63.
40. Maniadakis N, Gray A. The economic burden of back pain in the UK. *Pain* 2000;84:95-103.
41. [de Jonge P, Huysse FJ, Stiefel FC. Case and Care Complexity in the Medically Ill. \*Med Clin N Am\* 2006;90:679-92.](#)
42. Seal KH, Shi Y, Cohen BE, et al. Association of mental health disorders with prescription opioids and high-risk opioid use in US veterans of Iraq and Afghanistan. *JAMA* 2012;307(9):940-7.
43. Bohnert AS, Valenstein M, Bair MJ, et al. Association between opioid prescribing patterns and opioid overdose-related deaths. *JAMA* 2011;305(13):1315-21.
44. Dersh J et al. Chronic pain and psychopathology: research findings and theoretical considerations. *Psychosom Med* 2002;64:773-86.
45. Edit V, Eva S, Maria K, et al. Psychosocial, educational, and somatic factors in chronic non-specific low back pain. *Rheumatol Int* 2012 Apr 3. [Epub ahead of print]
46. Vargas-Schaffer G. Is the WHO analgesic ladder still valid? – Twenty-four years of experience. *Can Fam Physician* 2010;56:514-7.
47. Hauser W, Bernardy K, Uceyler N, et al. Treatment of fibromyalgia syndrome with antidepressants: a meta-analysis. *JAMA* 2009;301(2):198-209.
48. Ford AC, Talley NJ, Schoenfeld PS, et al. Efficacy of antidepressants and psychological therapies in irritable bowel syndrome: systematic review and meta-analysis. *Gut* 2009;58(3):367-78.
49. Saarto T, Wiffen PJ. Antidepressants for neuropathic pain. *Cochrane database of systematic reviews* 2007(4):CD005454.
50. Krebs EE, Gaynes BN, Gartlehner G, et al. Treating the physical symptoms of depression with second-generation antidepressants: a systematic review and metaanalysis. *Psychosomatics* 2008;49(3):191-8.
51. Arnold LM, Hudson JI, Wang F, et al. Comparisons of the efficacy and safety of duloxetine for the treatment of fibromyalgia in patients with versus without major depressive disorder. *Clin J Pain* 2009;25(6):461-8.
52. Arnold LM, Hudson JI, Keck PE, et al. Comorbidity of fibromyalgia and psychiatric disorders. *J Clin Psychiatry* 2006;67(8):1219-25.
53. Bekhit MH. Opioid-induced hyperalgesia and tolerance. *Am J Ther* 2010;17(5):498-510.
54. Berton O, McClung CA, Dileone RJ, et al. Essential role of BDNF in the mesolimbic dopamine pathway in social defeat stress. *Science* 2006;311(5762):864-8.
55. Upadhyay J, Maleki N, Potter J, et al. Alterations in brain structure and functional connectivity in prescription opioid-dependent patients. *Brain* 2010;133(Pt 7):2098-114.
56. Angst MS, Clark JD. Opioid-induced hyperalgesia: a qualitative systematic review. *Anesthesiology* 2006;104(3):570-87.
57. Rayner L, Price A, Evans A, et al. Antidepressants for depression in physically ill people. *Cochrane database of systematic reviews* 2010(3):CD007503.

1  
2  
3 *Reply to reviewer's comments regarding Manuscript ID BMJopen-2011-*  
4 *000731.R1 entitled "Observational evidence that urbanisation and*  
5 *neighbourhood deprivation are associated with escalation in chronic*  
6 *pharmacological pain treatment - a longitudinal population-based study in the*  
7 *Netherlands" (after reviewer's recommendation for publication).*  
8  
9

10 Changes in the original manuscript are marked with "track changes".  
11

12  
13  
14 **Reviewer Udo Reulbach**

15  
16 The authors have responded sufficiently to all my queries. I have no further comments. From  
17 my point of view, the quality of the article has greatly improved.  
18

19  
20  
21 **Reviewer A.K. Mantel-Teeuwisse**

22 -The manuscript has been improved by the clarifications given and changes made by the  
23 authors. In my view, the paper still lacks sufficient focus, especially in the discussion section.  
24 It is clear that the authors advocate to "broaden the pain agenda to an understanding that  
25 includes mental health perspectives". However, at least I missed a clear and concise link  
26 with the aim of this study – to assess whether the level of urbanization and neighbourhood  
27 deprivation are associated with analgesic escalation.  
28

29  
30 One may hypothesise that mental illness comes into play, but this has not been studied as  
31 such in detail. For example, the authors conclude "Escalation of chronic analgesic treatment  
32 is associated with urban and deprived environments, and occurs in a context of adding  
33 psychotropic medications, suggesting pain outcomes in part reflect area influences affecting  
34 mental health." I am not sure the last part of this sentence can be concluded from the  
35 presented data. The increased risk of escalation when using psychotropic medication is an  
36 independent risk, adjusted for many factors including level of urbanization and  
37 neighbourhood deprivation. Similarly, both urbanization and neighbourhood deprivation are  
38 independently associated with escalation as well (although I am not sure the remark by Dr  
39 Kirkbride about the high correlation between these two has been sufficiently addressed).  
40 But this does not necessarily mean that low level of urbanization and neighbourhood  
41 deprivation lead to use of psychotropic medication (as a proxy for mental illness) which then  
42 leads to dose escalation. Maybe I am missing the point here; I would be happy if the authors  
43 could further share their thoughts on this.  
44

45  
46 **Reply:** We agree this needs further clarification. Our argument was based not only on the  
47 independent risks linking urban environment and escalation on the one hand and  
48 psychotropic medication and escalation on the other, but also on published findings on links  
49 between urban environment and mental health on the one hand and urban environment  
50 and use of psychotropic medication on the other (Peen J, Schoevers RA, Beekman AT, et al.  
51 The current status of urban-rural differences in psychiatric disorders. *Acta Psychiatr Scand*  
52 2010;121(2):84-93. Crump C, Sundquist K, Sundquist J, et al. Neighborhood deprivation and  
53 psychiatric medication prescription: a Swedish national multilevel study. *Ann*  
54 *Epidemiol*;21(4):231-7.). Given these findings, the abstract conclusion now reads as follows:  
55 "Escalation of chronic analgesic treatment is associated with urban and deprived  
56 environments, and occurs in a context of adding psychotropic medication prescriptions."  
57  
58  
59  
60

1  
2  
3 **These findings suggest that pain outcomes and mental health outcomes share factors that**  
4 **increase risk and remedy suffering”.**  
5  
6  
7

8 -I am also still a bit puzzled by the definition of “continuous use”. I now understand that the  
9 authors wish to compare starters with those who have started 6 months earlier. Did all of  
10 the continuous users use analgesics during the whole period of six months prior to the  
11 observation period? If that was a requirement (I suppose so), it may be helpful to amend  
12 Figure 1 to reflect this use during all of these months.  
13

14 **Reply:** In order to ensure comparability, we measured analgesics’ escalation during an  
15 interval of the same length for the Starter and the Continuation group. Regarding  
16 “continuous use”, yes, we wished to compare starters with those who had started analgesic  
17 treatment six months earlier. No, we did not follow up whether the Continuation group used  
18 analgesics over the entire six month interval prior to the observation period. The Starter  
19 group, however, did not use any analgesics during the six month interval prior to the  
20 observation period. Technically, we could have measured escalation of continuing patients  
21 over a longer time interval, but then the definition of escalation between both groups would  
22 be different and a direct comparison of starters and continuing patients would have become  
23 difficult.  
24

25 We added the following text to the legend of Figure 1: **“Patients in the Continuation group**  
26 **received first prescription of analgesics in month 1 of the pre-observation period; there**  
27 **was no follow-up whether analgesics were continued over the entire six-month interval**  
28 **prior to the observation period. The Starter group did not use any analgesics during the six**  
29 **month interval prior to the observation period”.**  
30  
31

32  
33 -Table 2: I do understand that the authors need to make some choices in which data to  
34 present. However, I feel that the main study outcome, % of escalation, neutral or de-  
35 escalation is now a bit “hidden” in table 2. The justification for comparing level 1 with levels  
36 2-5 is still lacking (why not another combination?). Ideally, these % would therefore be  
37 presented for each level and for neighbourhood deprivation yes/no. In the current table, %  
38 is not displayed for those not living in a deprived neighbourhood, which hampers proper  
39 interpretation of the % escalation in deprived neighbourhoods.  
40

41 **Reply:** We added a column % of escalation in “non deprived neighbourhoods” to Table 2.  
42 Given the small difference with column “urbanicity level 2-5” our choice to summarize levels  
43 of urbanisation is justifiable. Please note that we had to make choices regarding data  
44 presentation in order to guarantee overview and to avoid diluted results. In our opinion, this  
45 table now makes for comfortable reading, without withholding any relevant information.  
46 Thus, table 2 now reads:  
47 (On the following page)  
48  
49  
50  
51  
52  
53  
54  
55  
56  
57  
58  
59  
60

|             |                                           | Starter group        |                              |                   |                          | Continuation group    |                 |                   |                          |
|-------------|-------------------------------------------|----------------------|------------------------------|-------------------|--------------------------|-----------------------|-----------------|-------------------|--------------------------|
|             |                                           | Deprived<br>Nb.hoods | Urbanicity <sup>1</sup><br>1 | Urbanicity<br>2-5 | Non<br>Depr.<br>Nb.hoods | Deprived<br>Nb. hoods | Urbanicity<br>1 | Urbanicity<br>2-5 | Non<br>Depr.<br>Nb.hoods |
| Patients    | (Absolute)                                | 12485                | 45458                        | 120916            | 153889                   | 21799                 | 78358           | 204678            | 261237                   |
| Change in   | Analgesics <sup>2</sup>                   |                      |                              |                   |                          |                       |                 |                   |                          |
|             | De-escalation                             | 13.3%                | 12.1%                        | 10.4%             | 10.7%                    | 13.2%                 | 12.5%           | 11.2%             | 11.4%                    |
|             | Neutral                                   | 70.1%                | 71.6%                        | 74.5%             | 74.0%                    | 70.0%                 | 71.4%           | 73.7%             | 73.3%                    |
|             | Escalation                                | 16.5%                | 16.3%                        | 15.1%             | 15.3%                    | 16.8%                 | 16.1%           | 15.1%             | 15.3%                    |
| Gender      | Male                                      | 39.8%                | 39.3%                        | 40.3%             | 40.0%                    | 36.7%                 | 35.2%           | 34.6%             | 34.6%                    |
|             | Female                                    | 60.2%                | 60.7%                        | 59.7%             | 60.0%                    | 63.3%                 | 64.8%           | 65.4%             | 65.4%                    |
| Age (years) | 15-25                                     | 6.3%                 | 6.1%                         | 6.5%              | 6.4%                     | 1.8%                  | 1.6%            | 1.8%              | 1.7%                     |
|             | 26-40                                     | 23.8%                | 19.2%                        | 16.3%             | 16.6%                    | 14.0%                 | 10.8%           | 9.7%              | 9.7%                     |
|             | 41-65                                     | 50.0%                | 49.6%                        | 50.9%             | 50.6%                    | 56.9%                 | 53.4%           | 51.8%             | 51.9%                    |
|             | 65-85                                     | 19.8%                | 25.2%                        | 26.2%             | 26.4%                    | 27.3%                 | 34.2%           | 36.7%             | 36.7%                    |
| First       | Analgesics                                |                      |                              |                   |                          |                       |                 |                   |                          |
|             | Level 1                                   | 3.2%                 | 3.9%                         | 4.0%              | 4.0%                     | 3.0%                  | 3.8%            | 4.1%              | 4.1%                     |
|             | Level 2                                   | 64.8%                | 66.6%                        | 72.6%             | 71.4%                    | 47.8%                 | 47.1%           | 53.6%             | 52.1%                    |
|             | Level 3                                   | 2.2%                 | 2.5%                         | 2.6%              | 2.6%                     | 6.4%                  | 8.1%            | 8.9%              | 8.8%                     |
|             | Level 4                                   | 27.4%                | 24.2%                        | 18.3%             | 19.3%                    | 36.1%                 | 33.9%           | 27.6%             | 28.8%                    |
|             | Level 5                                   | 2.4%                 | 2.9%                         | 2.6%              | 2.7%                     | 6.8%                  | 7.2%            | 5.9%              | 6.2%                     |
|             | level 4/5                                 | 29.8%                | 27.0%                        | 20.8%             | 21.9%                    | 42.8%                 | 41.1%           | 33.5%             | 35.0%                    |
| Last        | Analgesics                                |                      |                              |                   |                          |                       |                 |                   |                          |
|             | Level 1                                   | 3.4%                 | 3.9%                         | 4.0%              | 4.0%                     | 3.4%                  | 4.1%            | 4.3%              | 4.3%                     |
|             | Level 2                                   | 61.9%                | 63.0%                        | 68.4%             | 67.4%                    | 44.5%                 | 44.1%           | 50.1%             | 48.8%                    |
|             | Level 3                                   | 3.0%                 | 3.3%                         | 3.4%              | 3.4%                     | 7.0%                  | 8.4%            | 9.2%              | 9.1%                     |
|             | Level 4                                   | 27.6%                | 24.6%                        | 18.9%             | 19.9%                    | 36.8%                 | 34.5%           | 28.4%             | 29.6%                    |
|             | Level 5                                   | 4.1%                 | 5.2%                         | 5.3%              | 5.3%                     | 8.3%                  | 9.0%            | 7.9%              | 8.2%                     |
|             | Level 4/5                                 | 31.7%                | 29.8%                        | 24.2%             | 25.2%                    | 45.1%                 | 43.4%           | 36.3%             | 37.7%                    |
| Concomitant | Medication <sup>3</sup>                   |                      |                              |                   |                          |                       |                 |                   |                          |
|             | Any concomitant medication                | 78.8%                | 79.0%                        | 77.3%             | 77.7%                    | 89.3%                 | 89.6%           | 88.0%             | 88.4%                    |
|             | Migraine medication                       | 3.9%                 | 3.6%                         | 3.8%              | 3.7%                     | 5.9%                  | 5.2%            | 5.1%              | 5.1%                     |
|             | Any psychotropic medication               | 35.1%                | 36.6%                        | 34.8%             | 35.3%                    | 51.6%                 | 53.2%           | 50.2%             | 51.0%                    |
|             | Sedatives                                 | 27.0%                | 29.0%                        | 27.4%             | 27.9%                    | 41.5%                 | 43.4%           | 40.6%             | 41.4%                    |
|             | Mood stabilizers                          | 0.2%                 | 0.3%                         | 0.2%              | 0.3%                     | 0.3%                  | 0.4%            | 0.4%              | 0.4%                     |
|             | Antipsychotics total                      | 4.1%                 | 3.9%                         | 3.1%              | 3.2%                     | 6.7%                  | 6.1%            | 4.9%              | 5.1%                     |
|             | Antipsychotics 2 <sup>nd</sup> generation | 2.4%                 | 2.2%                         | 1.5%              | 1.6%                     | 4.1%                  | 3.5%            | 2.5%              | 2.7%                     |
|             | Antipsychotics classic                    | 2.0%                 | 2.1%                         | 1.8%              | 1.8%                     | 3.2%                  | 3.2%            | 2.7%              | 2.8%                     |
|             | Bupropion                                 | 0.1%                 | 0.1%                         | 0.1%              | 0.1%                     | 0.2%                  | 0.2%            | 0.1%              | 0.1%                     |
|             | MAO inhibitors                            | 0.0%                 | 0.0%                         | 0.1%              | 0.0%                     | 0.1%                  | 0.1%            | 0.1%              | 0.1%                     |
|             | TCA                                       | 5.2%                 | 5.0%                         | 5.0%              | 5.0%                     | 9.5%                  | 9.4%            | 9.6%              | 9.6%                     |
|             | Other antidepressants <sup>4</sup>        | 2.4%                 | 2.0%                         | 1.6%              | 1.7%                     | 4.0%                  | 3.3%            | 2.7%              | 2.8%                     |
|             | SNRI                                      | 2.6%                 | 2.4%                         | 2.2%              | 2.2%                     | 4.5%                  | 4.0%            | 3.5%              | 3.6%                     |
|             | SSRI                                      | 7.5%                 | 7.0%                         | 6.4%              | 6.5%                     | 10.3%                 | 10.0%           | 9.0%              | 9.2%                     |
|             | Psycho-stimulants                         | 0.4%                 | 0.5%                         | 0.5%              | 0.5%                     | 0.3%                  | 0.5%            | 0.4%              | 0.5%                     |
|             | Any somatic medication                    | 72.3%                | 72.6%                        | 71.0%             | 71.4%                    | 83.0%                 | 82.9%           | 81.7%             | 81.9%                    |
|             | Cardiovascular medication <sup>5</sup>    | 30.9%                | 31.4%                        | 30.8%             | 30.9%                    | 35.2%                 | 34.9%           | 34.9%             | 34.9%                    |
|             | Other Somatic medication <sup>6</sup>     | 65.2%                | 65.5%                        | 64.0%             | 64.3%                    | 76.9%                 | 76.7%           | 75.4%             | 75.6%                    |

-Tables 3-4: If the editor agrees I would prefer to present unadjusted ORs as well.



**Reply:** Of course we remain open to editorial advice in this issue. As we stated earlier, we decided to leave out crude ORs, as in our view they do not add information since they're not corrected for coincidental variation in the other variables. Given the already large amount of figures/tables, and the amount of information that would need to be added, we refrained from adding non-vital information. With regard to the complexity of the tables, as mentioned earlier by reviewer Mantel-Teeuwisse and Reulbach, our aim is to guarantee overview and readability.

-The absolute risk difference of (approximately) 1.5% in escalation between different levels of urbanicity would mean that for every 67 patients treated with analgesics, 1 additional escalation would be expected in the lowest level of urbanicity as compared to levels 2-5. One may indeed argue that this is important from a public health perspective. The discussion of the clinical implications of this finding could be a bit more focused in my opinion. The authors now directly assume that this is due to mental illness and elaborate on that (e.g. page 21, lines 46 and further). But I am not completely convinced this can be concluded – see comment above – and would therefore refrain from too much elaboration in that direction.

**Reply:** Given the well-known increase of health care costs in complex patients with frequent utilization of health care, with or with out psychiatric comorbidity, only a small number of patients is required to cause relevant clinical cost changes (de Jonge P, Huyse FJ, Stiefel FC. Case and Care Complexity in the Medically Ill. *Med Clin N Am* 2006;90:679-92.). Thus, even without psychiatric comorbidity, escalation of analgesics in chronic pain states is of clinical relevance.

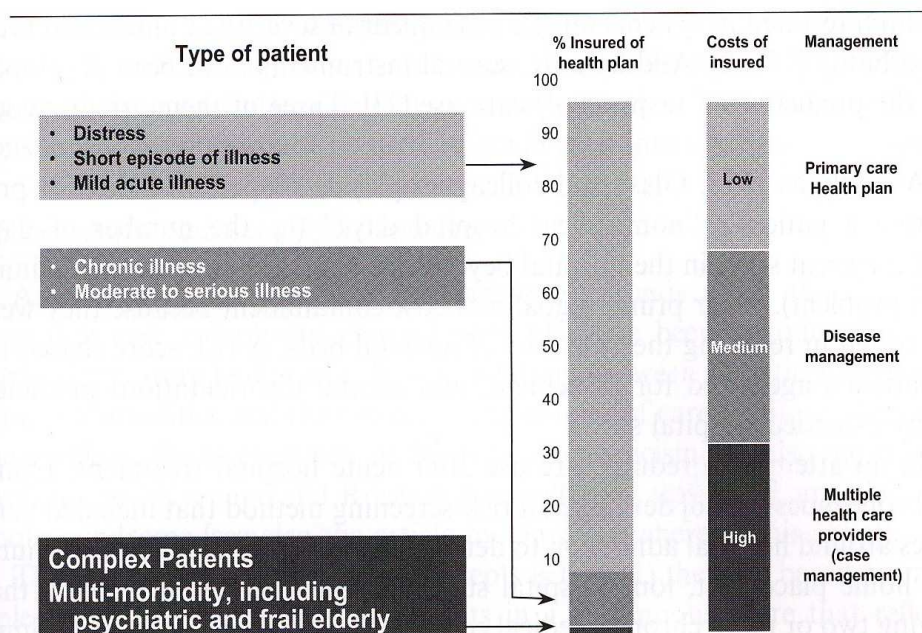

Fig. 1. Matching levels of case complexity to complexity of care in the management of the medically ill.

Adapted from de Jonge et al. *Med Clin N Am* 2006.

Regarding somatic and psychiatric multi-morbidity, please see our reply above on first comment of reviewer Mantel-Teeuwisse.

1  
2  
3 We added a sentence to the discussion (page 21, lines 13 to 16 of the original manuscript):  
4 **“Given the well known increase of health care costs in complex patients with frequent**  
5 **utilization of health care, with or without psychiatric comorbidity, only a small number of**  
6 **patients is required to cause relevant clinical cost changes<sup>41</sup>”.**  
7  
8

9  
10 **Reviewer James B Kirkbride**

11  
12 1. P9, line 7-9: the new sentence beginning “Urbanisation is defined by CBS...” does not read  
13 correctly in English after the comma, and should be corrected.

14  
15 **Reply:** P9, original manuscript line 6-8 reads correctly in English now: **“Conform previous**  
16 **work, and in line with the classification developed by CBS, level of urbanisation was**  
17 **defined as the number of addresses relative to area surface<sup>22</sup>”.**  
18

19  
20 2. Neighbourhood Deprivation Index – thank you for providing the additional information  
21 about this variable. However, I am unsure of the utility of using this variable in your analysis.  
22 This dichotomized variable only distinguishes between the upper most deprived  
23 neighbourhoods (5.5%) and the remainder. It would be preferable to use the raw scores  
24 from NIVEL, rather than this dichotomous variable. Furthermore, the NDI includes  
25 population density in it as a measure, which means your urbanicity and deprivation variables  
26 are likely to be highly correlated.  
27

28  
29 **Reply:** Unfortunately, as we stated in the reply to reviewers’ comments regarding  
30 Manuscript ID BMJopen-2011-000731 (03-May-2012), we do not have raw NDI scores from  
31 NIVEL. Although neighbourhood deprivation and urbanicity are correlated, additional  
32 association of deprivation with escalation of analgesics exists over and above urbanisation,  
33 indicating that other parameters than population density are involved too.  
34 We added a sentence to the discussion (page 20, lines 10 to 13 of the original manuscript):  
35 **“Furthermore, although neighbourhood deprivation and urbanicity are correlated,**  
36 **additional association of deprivation with escalation of analgesics exists over and above**  
37 **urbanisation, indicating that other parameters than population density are involved too”.**  
38

39  
40 3. Table 1 – the presentation of the data in this table is very unclear. I cannot see easily how  
41 the %s add up or why the NDI only appears on the first two rows of the urbanicity variable.  
42 This needs greater clarification  
43

44  
45 **Reply:**

46  
47 **Table 1** now reads: (on following page)  
48  
49  
50  
51  
52  
53  
54  
55  
56  
57  
58  
59  
60



| Type of patient    | Urbanisation level | Deprived Neighbourhood |        |            |         | % within Deprived Neighbourh. |
|--------------------|--------------------|------------------------|--------|------------|---------|-------------------------------|
|                    |                    | No (patients)          | No (%) | Yes (pat.) | Yes (%) |                               |
| Starter Group      | 1                  | 34662                  | 76.3%  | 10796      | 23.7%   | 86.5%                         |
|                    | 2                  | 48673                  | 96.6%  | 1689       | 3.4%    | 13.5%                         |
|                    | 3                  | 31107                  | 100.0% | 0          | 0.0%    | -                             |
|                    | 4                  | 28283                  | 100.0% | 0          | 0.0%    | -                             |
|                    | 5                  | 11164                  | 100.0% | 0          | 0.0%    | -                             |
|                    | total              | 153889                 | 92.5%  | 12485      | 7.5%    | 100.0%                        |
| Continuation Group | 1                  | 59714                  | 76.2%  | 18644      | 23.8%   | 85.5%                         |
|                    | 2                  | 81406                  | 96.3%  | 3155       | 3.7%    | 14.5%                         |
|                    | 3                  | 50853                  | 100.0% | 0          | 0%      | -                             |
|                    | 4                  | 48511                  | 100.0% | 0          | 0%      | -                             |
|                    | 5                  | 20754                  | 100.0% | 0          | 0%      | -                             |
|                    | total              | 261237                 | 92.3%  | 21799      | 7.7%    | 100.0%                        |
| Total Patients     |                    | 415126                 | 92.4%  | 34284      | 7.6%    |                               |

We hope the presentation of the data is clear now. The NDI itself is not available in our data but the dichotomous variable Neighbourhood Deprivation (yes/no) is. All percentages are added up to clarify their calculation. Adapted Table 1 and the legend are added to the original manuscript (original manuscript page 10, line 7 to 27).

The legend now reads: **“The sample is described in absolute numbers for the Starter and the Continuation group, stratified by living in an urbanised area (level 1 to 5), and a dichotomous measure of neighbourhood deprivation. Furthermore, in the last column, tabulation is presented for living in a deprived neighbourhood as a function of level of urbanisation (e.g. in the Starter group, 86.5% of the sample living in deprived neighbourhoods lived in an area with urbanisation level 1)”**.

4. P20, line 32-33. Line beginning “Although unlikely to entirely explain the current findings...”. Why would this be unlikely? It could be entirely possible. You have no way of deducing the strength of this possibility in the data you have presented. It is important to have acknowledged the possibility of reverse causation, thank you for doing so, but I would drop this line.

**Reply:** P20, line 13-15 of the original manuscript now reads: **“However, the findings could also be attributed to reverse causation, i.e. patients with worsening pain may move into more urban and deprived neighbourhoods as a consequence of being disabled due to ill health”**.

Thus, we dropped the line suggested by reviewer Kirkbride.

1  
2  
3  
4 5. A statement on ethical approval for this study is required according to the BMJ Open reviewer  
5 criteria, but I couldn't see one. This could be easily addressed, I'm sure.  
6

7 **Reply:** A statement on ethical approval is added at the end of the article now: "**Data were**  
8 **anonymous, reflecting routine general practice. In the Netherlands, no ethical commission**  
9 **approval is required for analyses using anonymous data acquired in routine practice"**  
10 (page 25, line 17 to 19 of the original manuscript). This statement is identical to what has  
11 been stated earlier (reply to reviewers' requests concerning manuscript ID BMJopen-2011-  
12 000731, and the submission format, which has already been noticed by the editor).  
13

14  
15  
16 -Well done again on all the changes, the paper reads extremely well now, and will be further  
17 improved after consideration of the above points.  
18

19 **Reply:** Thank you for the compliment!  
20  
21  
22  
23  
24  
25  
26  
27  
28  
29  
30  
31  
32  
33  
34  
35  
36  
37  
38  
39  
40  
41  
42  
43  
44  
45  
46  
47  
48  
49  
50  
51  
52  
53  
54  
55  
56  
57  
58  
59  
60
